# Supplementary material for: Precious1GPT: multimodal transformer-based transfer learning for aging clock development and feature importance analysis for aging and age-related disease target discovery
Source: Aging (Albany NY). 2023 Jun 13;15(11):4649–66. doi: 10.18632/aging.204788 (PMC10292881; doi:10.18632/aging.204788)
Supplement: Supplementary Tables 3-8 [file aging-15-204788-s003.xlsx]

## Sheet: Supplementary Table 3
Supplementary Table 3. Feature importance analysis for Aging clock.
Gene	SHAP
EYA4	0.305776
NRIP3	0.27496
FHL2	0.268575
ZNF208	0.233874
LMO3	0.224197
RPSAP58	0.214277
CCDC144A	0.210041
ALX1	0.202339
RHBDD1	0.200739
C10orf88	0.191126
HIST1H2AM	0.188136
CECR7	0.187309
ZMAT3	0.184809
VGF	0.182176
SIK1	0.18109
CECR1	0.178072
C9orf64	0.174393
PCDH17	0.170695
CYP1A1	0.170243
NPFF	0.165137
KCNS1	0.163404
ZNF518B	0.1609
SLC6A15	0.159487
ECHDC3	0.155807
NEFH	0.153717
ZNF77	0.148946
STXBP5L	0.148801
NPEPL1	0.148609
PCDHB2	0.148101
BCR	0.146961
BOK	0.14638
AARS2	0.14419
ABHD14B	0.141124
SHOX2	0.140879
SEZ6	0.137405
MOV10L1	0.136339
TDRD9	0.133521
TMEM181	0.133311
ZNF808	0.132791
ZNF530	0.131537
DDO	0.131011
NUP85	0.130802
BID	0.129728
CNR1	0.126589
ESM1	0.125149
HKR1	0.123187
PURG	0.122192
MAFA	0.122097
HIST1H2BH	0.121738
WNT16	0.120323
UBE2L3	0.119952
MESP2	0.119423
IGFN1	0.119058
SLC7A10	0.118405
CCNDBP1	0.118398
SLC14A1	0.118341
ALDH1A2	0.118216
SSPO	0.117821
PPM1E	0.117546
ZNF599	0.117325
SLC7A5	0.116992
SLC9A8	0.116451
PTP4A3	0.11645
S100Z	0.116406
CBS	0.115827
EYA2	0.114167
GUCA1A	0.114131
EIF2B3	0.114067
ZSWIM3	0.11367
SYNM	0.11367
FBXO39	0.113396
CPEB1	0.112946
ADRA2B	0.112839
DHX40	0.112309
C10orf35	0.112223
PCDHB19P	0.112209
TARBP1	0.112096
CTSG	0.112071
CDK10	0.112031
HOMER3	0.111017
TRIM74	0.110916
ARHGAP29	0.110886
CPNE1	0.110867
PRSS16	0.110594
AMIGO3	0.110515
ACYP1	0.110373
PRH1	0.110372
HOXD11	0.110343
CAPRIN2	0.11027
GSDMA	0.110099
LRFN5	0.109793
ZFP57	0.109652
POMC	0.109483
SEMA3E	0.109232
SDHAP2	0.109144
ZNF197	0.108982
KL	0.108568
KLF14	0.108506
TEKT3	0.108268
C2orf74	0.108034
PODXL2	0.108006
ST6GALNAC1	0.107276
F2RL3	0.107251
SLC37A3	0.107237
GTF2H4	0.106517
NEDD1	0.10649
C9orf40	0.106209
C22orf15	0.105611
BEND7	0.105601
NAAA	0.105332
MYO1C	0.104972
POU2F3	0.104772
OXT	0.104564
ENOSF1	0.104527
ASNS	0.104263
COLQ	0.10398
GLIPR1L2	0.103824
JPH2	0.103771
WBSCR27	0.103534
ESPNP	0.103511
TMEM206	0.103484
TRNT1	0.103368
GPR153	0.102762
SPAG6	0.102668
VASN	0.102657
MICB	0.102508
RRP7A	0.102384
REM1	0.102245
HDGF	0.102221
KIAA0355	0.102184
CHRNE	0.101283
C12orf43	0.101034
RAD54L2	0.101016
HLA-L	0.100758
AP1S1	0.100396
GPR21	0.10018
SIGLEC15	0.0999526
PRR25	0.0999428
PCDHB8	0.0997825
HERC6	0.0996367
FBXL21	0.0996269
SH2D4A	0.0993684
CALHM1	0.0993436
CSNK1E	0.0993335
PCDHB9	0.0992858
ANKMY1	0.0992141
KRTCAP3	0.0990894
KRTAP5-7	0.0989557
FRMD8	0.0989365
CIB2	0.0988861
ZNF483	0.0987255
CTF1	0.0986025
NEUROG2	0.0984502
DHX35	0.0982905
RGS5	0.0982735
GRM2	0.09826
ST8SIA5	0.0982183
WWOX	0.0981746
BARHL2	0.0981193
CTSF	0.0977648
S100A9	0.0977575
CELSR3	0.0976636
DSCR3	0.0976158
RXRG	0.0975589
GPR17	0.0974367
METTL4	0.0971917
PGBD2	0.097028
RHCE	0.0970022
CBLN2	0.0969306
FAM78B	0.096682
LONRF2	0.0965666
CBLB	0.0962592
ACOT4	0.0962149
HSD17B4	0.0961296
POLR3H	0.0959385
EPHA5	0.0958414
ZNF709	0.0957576
SLC22A3	0.0956407
NT5E	0.0956351
ZNF300	0.0955952
TEX101	0.0954346
PPWD1	0.0954206
TLE6	0.0953611
DNAJB4	0.0951896
CLEC4GP1	0.094985
PRR22	0.0949792
ZNF555	0.0948562
VSX2	0.0945388
ZNF629	0.0944725
VAX2	0.0942983
AEN	0.0942939
APOA4	0.094266
VENTX	0.0942625
FAM96B	0.0941872
COL9A2	0.0939586
DPYSL4	0.0938886
PWP2	0.0938206
PRRC1	0.0935588
FOXJ1	0.0935546
BMS1	0.0934723
HOXD10	0.093375
INSL6	0.0933731
NBPF3	0.0933631
C20orf141	0.0932257
INTS1	0.093224
KRTAP5-10	0.0931889
ARTN	0.0930757
TCF21	0.0930306
LBP	0.092891
WNK4	0.0927735
GBX2	0.0927354
PEX6	0.0927337
SND1	0.0926904
STK25	0.0926486
XKR9	0.0924875
SLC12A5	0.0924824
TCN2	0.0921609
PLA2G4C	0.0917427
ATG10	0.0917121
OLFML2A	0.091681
EPHA2	0.0914627
ZNF215	0.0914499
HSPBP1	0.0914042
ZNF233	0.0913784
TRIM6	0.0912665
TMPRSS6	0.0912087
CRMP1	0.0910927
CCT8	0.0910591
NDUFA4L2	0.0910196
FOXD3	0.0909958
PROSC	0.0909159
ARMC10	0.0908702
IL19	0.0907953
SPSB1	0.0906776
FBLN2	0.0906563
CRYGA	0.0906258
DRD2	0.0906031
TWF2	0.0905434
ZNF266	0.0905283
RAB27A	0.0905022
CPXM1	0.090452
SUSD2	0.0904469
C16orf89	0.0903864
PCDHA12	0.0903409
CCDC117	0.09013
PRR18	0.0901076
C10orf82	0.090014
TMEM200A	0.0898579
CYP4F3	0.0898334
MAP3K11	0.0897501
RFPL3	0.0896592
DEFB124	0.0896514
GPR78	0.0896293
RORB	0.0895356
STAB2	0.0895186
PKDREJ	0.0894275
CSMD2	0.0893586
ERP27	0.089005
LIMK2	0.0888972
RBM11	0.0888527
ASCL2	0.0888361
NUMBL	0.0885991
ACBD5	0.0884834
GDF15	0.0883908
CPNE7	0.0882984
CRYBB2	0.0878561
ZNF514	0.0878535
F5	0.0878487
C7orf25	0.0877568
SLC16A8	0.0877445
MRGPRE	0.0875765
HIST1H3E	0.0875263
SP9	0.0875159
IRX1	0.0874572
PAPLN	0.0873973
PLIN4	0.0873699
TYMS	0.0872984
ARMC4	0.0872532
LIME1	0.0869247
FOXI2	0.086918
GRIN2D	0.086796
FER1L4	0.0867901
CLEC9A	0.0867876
CPA1	0.0867514
NT5M	0.0865988
HIST1H2BK	0.0865474
MYO15A	0.0865147
SPRY1	0.0859894
SMPDL3A	0.0859761
PTH2R	0.0859721
CALB2	0.0858875
CRABP2	0.0857581
ZNF23	0.085611
MEST	0.0856074
SPATA5L1	0.0855854
FBXO43	0.0855634
RAB4A	0.0853851
LY75	0.0853764
SGCG	0.0853086
PDE4C	0.0852699
NRTN	0.0851711
CST6	0.0851031
TFEB	0.0850879
PTP4A1	0.0850634
PIK3C2B	0.0850488
KLF7	0.0848586
SLC26A5	0.0848345
ATP2A3	0.084762
SPRR2F	0.0846664
LIX1	0.0846641
PITPNA	0.0844797
HAUS5	0.0844616
CKB	0.0843722
LHFPL5	0.0843479
CPEB4	0.0842283
CNTN1	0.0841254
SPTBN5	0.0840861
PAQR9	0.0840383
NLRP2	0.0840112
GALR1	0.0840005
ASPG	0.083973
CLEC4M	0.0838465
POLH	0.0838285
NWD1	0.0837347
PLK3	0.0836774
PSTK	0.0836216
ZNF549	0.0836135
HIF3A	0.0835312
SHQ1	0.083289
ATP13A5	0.0832277
ZNF675	0.0831554
SLC35A1	0.083125
HOPX	0.0829244
C8orf74	0.0828996
EXOSC10	0.0828822
OTX1	0.0828586
GTSF1L	0.0828558
CRLF1	0.0827878
RPL36AL	0.0827153
PIWIL2	0.0826593
ZNF506	0.082604
SYT1	0.0824932
DYM	0.0823114
REN	0.0822803
ZNF268	0.082104
SMAD7	0.0821024
DDB2	0.0820459
ASXL3	0.0819703
CPLX3	0.0817788
SHISA2	0.0817596
POLI	0.0817072
LGR5	0.0817048
HRCT1	0.0817022
ZNF627	0.0816872
TOMM20L	0.0815621
CPT1C	0.0814933
SLC45A2	0.0814562
TNFRSF9	0.081454
SSTR1	0.0814061
TMEM169	0.0813365
KLRG2	0.0813014
KCNV1	0.081204
OBSCN	0.0811978
CD70	0.0811815
PAX1	0.0810885
ZC3H11A	0.0810812
TMEM86B	0.0810603
TRPC2	0.0810373
LTK	0.0809091
KIAA1429	0.0808544
FAM160A1	0.080844
EPHA6	0.0808423
TIPIN	0.0808261
SERPINF1	0.0807813
CRYGN	0.0807006
C21orf33	0.0806142
C6orf15	0.0805676
CD300LG	0.0805517
TBX4	0.0804995
SESN3	0.0803667
VARS2	0.0803534
CCDC116	0.0803404
IL9	0.080193
EEF1A1	0.0801239
CCDC17	0.0800852
TBX21	0.0800734
HPR	0.0800708
PADI4	0.0800585
IL20	0.0800135
PRX	0.0799323
KRTAP15-1	0.07992
PDE6B	0.07989
CNGA4	0.0798484
ZNF441	0.0798438
ALOX12B	0.0798103
HAPLN1	0.0797345
SSBP2	0.0796645
YY1AP1	0.0796406
MEGF6	0.0796351
IQCC	0.0795875
C8orf22	0.0794612
SPIRE1	0.0794439
SLC8A3	0.0792437
MRPS33	0.0792115
KIAA1683	0.0791843
ZNF718	0.0791531
RPS23	0.079112
UNG	0.0790944
PSPH	0.0789102
SGTB	0.0788648
NT5DC2	0.0787797
SAMD11	0.0787717
PI4KB	0.0787326
COL1A2	0.0786933
RAD18	0.0786483
HAUS3	0.0786475
EIF4E2	0.0786303
PHLDA1	0.0786298
FBXL4	0.0785871
ADAM28	0.0785833
TAC1	0.0785815
SCUBE2	0.0785796
BEST1	0.0785604
CYP3A43	0.0785206
OPN4	0.0784283
LILRB5	0.0782831
MAP3K6	0.0782531
CD101	0.0781697
TTC12	0.0781632
SYN3	0.0781217
GOLT1A	0.078074
PEX26	0.0780616
PRM2	0.0779858
PABPN1L	0.0779832
APLNR	0.0779698
CLVS1	0.0779388
SFI1	0.0779113
SOCS2	0.0778982
OR52W1	0.0778773
TGFB3	0.0776643
XPO1	0.0776608
RNF17	0.0776544
MTO1	0.077654
PRSS45	0.0776445
ZNF692	0.0776052
FGFBP3	0.0775694
TTC14	0.0774441
CCDC82	0.0774043
MRGPRF	0.077367
GPR37L1	0.0773544
WDR35	0.0773377
USP44	0.0772975
COX19	0.0772806
INSM2	0.077266
SEC61G	0.0772503
STYXL1	0.0771695
CSMD3	0.0771648
KDM3B	0.0771132
E2F5	0.0770197
WNT1	0.0769695
FAM180B	0.076952
SULF2	0.0769423
PRR16	0.0769185
CDH9	0.0769036
PRAME	0.0768944
GALNT13	0.0768941
AMD1	0.0768825
TRAK2	0.0768265
KIRREL3	0.0768215
LYPD6B	0.0768187
EHD2	0.0767996
SLC4A4	0.0767831
KRT40	0.0767449
ADCY5	0.0766501
NHLRC1	0.0766332
ELN	0.0766309
USP14	0.0765652
NUP62	0.0765209
KCTD8	0.0764438
CRYM	0.0763681
MRPL23	0.0763561
RP1L1	0.0763118
WNT10A	0.0763072
MRPL54	0.0763044
STAG3	0.0762828
GH1	0.0762802
UBD	0.0762627
HEBP2	0.0762568
RHBDL3	0.0761917
TPD52	0.0761885
IL11	0.0761477
CHEK2	0.0761456
FRMD4A	0.0761229
IGF2BP1	0.0760886
ESCO2	0.0760532
TMIGD2	0.0760066
DNAJC15	0.0759882
ADIPOQ	0.0759796
TDRD10	0.0759728
NRBP2	0.0759407
PAX5	0.0758854
MAML3	0.0758014
TDRD5	0.0757707
DPP3	0.0757305
RBCK1	0.0757042
NCKAP1	0.0756634
E2F8	0.0755634
FAM163A	0.0755373
CAV2	0.0754765
NUP107	0.0753783
POLR1B	0.0753774
ZDHHC11	0.0753582
SIAH3	0.0753456
SCO2	0.0751873
FEZ2	0.07513
PLEKHH2	0.0751234
WDR48	0.0751032
GSTM1	0.0750729
IRX6	0.0750564
RND1	0.0750271
PRDM1	0.0750153
SLC13A3	0.0750018
NKX2-4	0.0750016
CD109	0.0749734
COL19A1	0.0749625
NUPL2	0.074962
SPTBN2	0.0749425
SLC25A28	0.0749352
TC2N	0.0749227
PIGT	0.0749132
IL12RB2	0.0749021
ZNF541	0.074874
DNASE1L3	0.0747452
CXCL14	0.07474
TRIM66	0.0747209
ZNF34	0.0747158
EMID1	0.0747138
HTR3E	0.0747078
AHCYL1	0.0747013
MATN3	0.0746901
FAM57B	0.0745801
AURKB	0.0745656
SNX2	0.0744942
PPP1R1B	0.0744894
RGR	0.0744518
TRIM41	0.0744303
ZNF415	0.074413
ANKRD22	0.0744094
LZTS1	0.0743515
PLXDC1	0.0743022
FOXD4	0.0742781
CHRNA9	0.0742327
OBP2A	0.0742217
ARPC5L	0.0741603
SUB1	0.0740587
ETV1	0.0740425
ISL1	0.0740237
MLXIPL	0.0740205
ANKRD34B	0.0739616
DPP8	0.0739534
UBP1	0.0739344
ELANE	0.0739059
PPIL3	0.073871
TSSC1	0.0738225
COQ10A	0.0738213
BTNL2	0.0738099
SNRPN	0.0737627
ATF7	0.073738
XCL1	0.0737184
SHISA3	0.0736278
DNAI2	0.0735868
NLE1	0.0735606
F10	0.0734361
RPS9	0.0734195
SCGB1D4	0.0733539
ZNF556	0.073334
ZNF497	0.0733122
GPR176	0.0732223
DPY19L1	0.0731398
NPR1	0.0730239
CTHRC1	0.0729712
FAM126A	0.072966
PTGES	0.072915
C16orf59	0.072884
ALPL	0.072856
GAD1	0.0728239
FDXR	0.0727621
CPT1B	0.0727613
POU4F1	0.0727587
CABIN1	0.0726806
MXI1	0.0726633
CYP2C19	0.0726437
SIGLEC7	0.0726282
ZNF70	0.0726221
THADA	0.0725866
GLIS2	0.072565
RPUSD3	0.0725444
SLC25A21	0.0725017
BCL2L14	0.0724765
SOX8	0.0724731
FBLL1	0.0724481
MTMR12	0.0723002
VEGFA	0.072291
SKAP2	0.0722662
FES	0.0722559
LPAR6	0.0722192
PTCD2	0.0721567
MPP2	0.0721324
BIRC6	0.0721072
SLC30A10	0.0721051
RAB38	0.0720125
SLC25A20	0.0719704
TRIM44	0.0719639
FN3K	0.071921
CCL18	0.0718907
CHRNA3	0.0718668
CDKN1A	0.0718492
TTC36	0.0718248
ZUFSP	0.0718083
CATSPER3	0.0717707
COMMD5	0.0717671
NSD1	0.0717111
HEMK1	0.0717075
DMP1	0.0716632
ARHGAP8	0.0716099
GRIK2	0.0715814
CYP27A1	0.0715293
RBM28	0.0714518
NCSTN	0.0714005
MT3	0.0713972
ZNF518A	0.071397
ICAM1	0.0713568
DHX36	0.0713495
NCCRP1	0.0712908
HES7	0.0712863
C8orf86	0.0712184
PIK3CG	0.0711832
PKHD1L1	0.0711658
LIG1	0.0711587
ITPR3	0.0711522
IL15	0.0710694
GREM2	0.0710452
GDF7	0.0709732
ARPC1A	0.0709675
CREB5	0.0709647
TMEM80	0.0709025
TSFM	0.0708965
ZNF417	0.0708781
YPEL5	0.0708188
ATAD5	0.0707715
C5orf15	0.07077
ZNF565	0.0707245
RND3	0.070696
MAG	0.070687
SLC4A5	0.0706761
GHRL	0.0706742
CLC	0.0706644
AMBP	0.0706404
AGK	0.0706207
RBM8A	0.0705558
BLOC1S3	0.0705087
DYNLL1	0.070471
TP53I11	0.0704642
TMEM59L	0.0704638
CATSPERG	0.0704006
C2CD2L	0.0703902
RBM19	0.0703781
ZNF154	0.0703674
HSPA7	0.0703477
C4orf26	0.0702218
HMSD	0.0702019
ZNF24	0.0701974
BCL2L1	0.0701467
TNF	0.0700862
ZP3	0.0700132
SGTA	0.0699825
MYRIP	0.0699549
DPM3	0.0699273
OGDHL	0.0699068
VDR	0.0698137
TMEM167B	0.0697992
CIR1	0.0697878
NAT14	0.0697732
CSF1R	0.0697373
STK32A	0.0697257
HRASLS5	0.0697193
PRUNE2	0.0697019
GNRH2	0.069644
GNB4	0.0696041
VSIG10L	0.0695568
LTBP1	0.0695327
OLFML3	0.0695141
LRGUK	0.0694875
PDIA2	0.0694626
PM20D2	0.0694483
DPRXP4	0.069384
AQP10	0.0693346
TAS2R31	0.0693257
BTG2	0.069311
WARS	0.0692776
ZNF343	0.069268
PXN	0.0692209
TRPM3	0.0692131
CLCN7	0.0692072
ITLN1	0.0692025
AP3M1	0.0692
GPX3	0.0691639
TTC39C	0.0691598
SPACA3	0.0691572
CNPY1	0.0691535
ARL15	0.069132
PF4V1	0.0691169
BMPER	0.0691123
CCDC144NL	0.0690995
HOXB8	0.0690976
ARSA	0.069076
WBP2NL	0.0690517
PRCD	0.069036
PDE4B	0.0690258
MYEF2	0.0690178
GPIHBP1	0.0689916
RPH3AL	0.0689411
DHRS4	0.0689218
C16orf90	0.0689091
ZNF451	0.0688925
F7	0.0688729
PRRT1	0.0688409
HTR6	0.0688191
ZNF133	0.0688175
SPATA1	0.0688129
NECAP2	0.0688054
RPP21	0.0687667
CLIC6	0.068694
ADM	0.0686579
PCGF5	0.0686377
CELA2B	0.0686248
ZNF703	0.0686139
PIP5K1C	0.0686116
NINL	0.0685873
ZFAND1	0.0685555
GJB3	0.0685507
ZNF843	0.0685147
TMPRSS5	0.068496
ADAMTS19	0.0684534
PRM1	0.0684482
SYT6	0.0684467
PBK	0.0684068
RFX8	0.068395
IL21R	0.068389
RBM26	0.0683779
ABCG2	0.0683505
SNX15	0.0683151
ZNF251	0.0683071
SLC38A11	0.0682565
MIF	0.068224
LIG3	0.0682211
EFNB3	0.0682182
MRPL32	0.0682006
ANO4	0.0681794
XPC	0.0681769
TEF	0.0681666
ZNF683	0.0681494
TMEM2	0.0681402
RABGEF1	0.0681369
PRSS21	0.0681259
SLIT1	0.0681087
ZNF474	0.0681082
MAEA	0.0680947
TMEM128	0.0680608
PACSIN2	0.068024
TSPAN4	0.0680095
CCDC103	0.0679709
CLCN1	0.0679442
PDCD1LG2	0.067943
FAM65A	0.0679289
MARVELD2	0.0679059
ATP6V0D2	0.0679037
LGALS3BP	0.0678986
IL17RE	0.0678297
MMP15	0.0678144
C8orf48	0.0678132
CCDC8	0.0677444
ZNF569	0.067728
ANGEL1	0.0677084
UNKL	0.0676635
LAMA2	0.0676615
CALCA	0.0676281
SLC4A1AP	0.0675992
MRPL55	0.0675711
HCRT	0.0675705
CGB8	0.0675062
GLRX3	0.067498
STYK1	0.0674825
IKBKAP	0.0674136
SPSB2	0.0673575
PRKAA1	0.067326
OAT	0.0673029
FAM184A	0.0672867
THAP3	0.0672754
CBFB	0.0672691
USP33	0.0672173
MAT1A	0.06721
NOTCH2NL	0.0672075
OCLN	0.0671989
SESN2	0.0671815
IFRD2	0.0671147
C14orf80	0.0670856
COL5A3	0.0669998
TRIB2	0.0669985
CDH10	0.0669742
UNC5D	0.06697
MLF2	0.0669502
NLGN1	0.0669415
PLCG2	0.0669321
LGI1	0.0669173
KLHL21	0.0669126
TRIM28	0.0668901
ZDHHC22	0.0668684
ZNF174	0.0668627
ALG2	0.0668416
MFSD6L	0.0668404
TNFRSF11A	0.066822
CLINT1	0.0668084
TGM2	0.0668063
RUFY4	0.0668021
PLAC9	0.0667383
MRPL42	0.0666946
XRRA1	0.066683
FAM183A	0.06664
SV2A	0.066601
USH2A	0.0666009
ZHX2	0.0665715
FAM26F	0.0665625
MUC20	0.0665174
CCDC106	0.0665062
SLC16A11	0.0664805
LRRN4	0.0664586
PSMB1	0.0664351
CHODL	0.0664328
CEP192	0.0664126
SS18L2	0.066366
PDCL	0.0663467
CAMP	0.0663273
HADHB	0.066314
DUOX2	0.066297
C3orf52	0.0662913
LAYN	0.0662298
ACTC1	0.0662125
TMEM71	0.0662038
MGRN1	0.0661875
PCDHGA1	0.0661481
ZG16B	0.066147
SLC35B3	0.0661397
LTBP2	0.0661148
CDC20B	0.0660558
STAMBP	0.0660419
PHTF2	0.0660193
SLC30A3	0.0660065
IWS1	0.0659969
THBD	0.0659765
OTP	0.0659607
FER1L5	0.0659457
GCDH	0.065918
CLEC3B	0.0659039
MTUS1	0.0658809
USP31	0.0658394
LRCH4	0.0658238
PDE7B	0.0658144
FHOD1	0.0658069
FAM65C	0.0657954
ZNF652	0.0657619
PPP1R3B	0.0657407
TMEM61	0.0657235
TRAFD1	0.0656896
GLDN	0.0656879
ADPRH	0.0656853
ZNF616	0.0656813
CSNK1G1	0.065667
GFRA3	0.0656562
CDH13	0.0656338
PRG4	0.0656224
ABLIM2	0.065604
ALPI	0.065599
CYP2E1	0.0655721
TUT1	0.0655657
VIT	0.0655483
CLDN19	0.0655378
CRHBP	0.0655176
MACROD2	0.065494
GLB1L3	0.0654624
SYNGR3	0.065438
HYAL1	0.0653969
C16orf54	0.0653727
PCDHB14	0.065369
TAS2R38	0.0653672
RPS27L	0.0653546
DIXDC1	0.0653473
HS2ST1	0.0653416
CISH	0.0653002
CRELD1	0.0652914
ADCY7	0.0651585
MT1M	0.0651434
SMG7	0.065117
GLP1R	0.0651152
DSCAML1	0.0651091
THBS1	0.0650979
VCAN	0.0650264
NETO2	0.0649737
ZNF114	0.0649625
C7orf34	0.0649316
ADRA1A	0.0649252
PLK1	0.0648784
HLA-J	0.064876
RALYL	0.0648332
FBF1	0.0647671
NAALADL1	0.0647535
ADAMTS18	0.0647391
KCNMB2	0.0646925
PAPOLB	0.0646415
TM4SF5	0.0645924
TDRD1	0.0645743
ZNF540	0.0645725
C7orf50	0.0645691
RNF19B	0.0645403
ARF5	0.0645321
RIN1	0.0645084
RAP2A	0.0645017
INPP4B	0.0645016
FMO3	0.0644768
ODC1	0.0644685
FBXO32	0.0644599
HIST1H1C	0.0644253
CARS	0.0644098
NDUFV1	0.0643967
UIMC1	0.0643621
CHAF1A	0.0643537
TTF1	0.0643408
INSM1	0.0643245
C7orf31	0.0643201
CRTC2	0.0642877
DNAJC7	0.0642628
ST7	0.0642587
NOXO1	0.0642389
HAPLN3	0.0642333
KIF25	0.0642114
TMEM175	0.0641884
LGR6	0.0641715
PGLYRP2	0.0641661
AKR1E2	0.0641622
B4GALNT2	0.0641499
HSD17B12	0.0641472
MAP7	0.0641446
CSTB	0.0641405
AZIN1	0.0641358
CCDC85B	0.0641151
HSPH1	0.0641058
PPY	0.0640821
POLR2J	0.0640719
ISOC2	0.064032
SNX3	0.0640151
WNT5A	0.0639895
PIGW	0.063983
PODN	0.0639479
MTF2	0.0638271
TPCN1	0.0638204
ZNF761	0.0638198
PYGM	0.0637763
ZNF263	0.063764
TLN1	0.0637349
MAB21L2	0.0636323
DLX4	0.0636274
ATP5S	0.0636202
HSPB7	0.0636083
OR7G1	0.0636013
RAMP1	0.063593
INS-IGF2	0.0635419
EIF4A3	0.0634868
SEPT12	0.0634796
ELAVL3	0.0634792
NCDN	0.0634491
ZWINT	0.0634451
OXER1	0.0634203
DEPDC5	0.0634121
OAF	0.0634021
UCK1	0.0633918
RPS13	0.0633715
FBN3	0.0633497
RPL18AP3	0.0633451
GIPR	0.063345
RAB37	0.0633183
SEMA3F	0.0632636
RBM4	0.0632574
WRB	0.0632569
PLAUR	0.0632437
LRCH1	0.0632416
TXNDC15	0.0632352
LOXHD1	0.0632312
LRP1	0.0631977
MOXD1	0.0631777
GUCY2C	0.0631656
GIPC3	0.063129
EXOC6B	0.063102
FBLN5	0.0630943
SNRNP48	0.0630729
SENP5	0.0630729
H3F3B	0.0630643
KLHL6	0.0630525
BEND4	0.0630312
APOE	0.0630227
MED21	0.0630156
PLXNA4	0.0630108
SCGB3A2	0.0630025
U2AF1L4	0.0629932
CHURC1	0.0629863
HCG4	0.06296
TPI1	0.0629494
SPATA22	0.0629383
UNC45B	0.0629333
SWAP70	0.0629313
MRPL48	0.0629157
CORIN	0.0629072
RSPH9	0.0628694
OAZ3	0.0628681
FKBP11	0.0628581
ZDHHC2	0.0628521
STEAP1	0.0628349
GFPT1	0.0628074
SPDYE4	0.0627992
ARHGAP22	0.0627344
CRTC3	0.0627321
LRRC27	0.0627295
RGL3	0.0626821
SDCBP2	0.0626698
WDR63	0.0626505
PHB	0.0626207
NKAPL	0.0626147
FAM49A	0.0626127
CYP46A1	0.062593
SOCS3	0.0625859
TAF1C	0.0625635
KCNS3	0.0625522
PPP3CA	0.0625519
CARD14	0.0625492
LARP1B	0.0625267
GAL3ST2	0.0625208
ANO1	0.062512
PTRH1	0.0624901
RPL32P3	0.0624773
GLDC	0.0624455
SYCP1	0.0624428
SGK1	0.0624082
ZNF140	0.0623801
AGXT	0.0623766
FAM187B	0.0623637
SYT15	0.0623175
TOR1A	0.0622729
SLC38A8	0.0622519
CHRNB3	0.0622173
UCN	0.0621575
KISS1	0.0621468
ISG20	0.0621146
OPCML	0.0621061
NCR2	0.0620643
FREM1	0.0620617
UPK3A	0.062053
BCDIN3D	0.062032
THNSL2	0.0620242
UCHL1	0.0619617
RNF150	0.0619584
PI4KA	0.0619471
CECR6	0.0619374
TRIM10	0.061936
OR1F1	0.0619155
NUAK1	0.0619102
MYO1B	0.0619057
CSDAP1	0.0619002
SPOCK3	0.061878
CCDC105	0.0618642
POLR2B	0.0618386
NR2E1	0.0617781
SEPSECS	0.0617779
VPS16	0.0617778
ZBTB3	0.0617686
ZNF747	0.0617628
MPV17L2	0.0617524
HERC3	0.06174
MIOX	0.0617263
SCT	0.0617134
GPR37	0.0617129
DPYS	0.0616781
SCML4	0.061633
MEF2A	0.0616183
TBCC	0.061609
IGSF22	0.0615955
C2orf82	0.0615942
CR1	0.0615825
BAD	0.0615575
XBP1	0.0615478
PYGO1	0.0615322
HIST1H2AI	0.0614876
SEC14L2	0.061487
PHACTR2	0.0614805
RBX1	0.0614711
GPR179	0.0614693
FSD1	0.0614206
CHORDC1	0.0614198
CALCOCO2	0.061418
KLK15	0.0614167
GTF3C1	0.0614095
ESR2	0.0613935
NAE1	0.0613755
NRIP1	0.0613623
KIAA0100	0.0613616
STK11IP	0.0613331
FBXO17	0.0613185
PDE1B	0.0612947
ROBO2	0.0612933
PAX3	0.0612783
MAP3K10	0.0612663
NEK7	0.0612142
RESP18	0.0612085
EPC1	0.0611521
EIF4H	0.0611511
NPM3	0.0611198
HIST1H4L	0.0610677
NUDT15	0.0610534
DDHD2	0.0610304
ARPP19	0.06101
CHCHD5	0.0610094
SKA1	0.0609981
PDZK1	0.0609973
LRRC15	0.0609874
TMEM198	0.0609667
GDF10	0.060923
FAM20B	0.0609192
WIPF3	0.0608933
GIMAP2	0.0608606
ACOT1	0.0608381
NID1	0.0607993
KCNH2	0.060775
SMC4	0.0607664
TNFRSF10C	0.0607662
NEK2	0.0607305
KAT5	0.06073
CELA3B	0.0607153
RPS21	0.060698
EPHB1	0.0606902
NGDN	0.0606901
PSD4	0.0606822
ERCC6	0.0606657
PLD5	0.0606323
TXNDC5	0.0606001
RIC8A	0.060567
SERPINB8	0.060563
C12orf66	0.0605591
PLD3	0.0605582
CHD5	0.060468
NPPB	0.0604597
ODF3B	0.0604573
IPO9	0.0604361
RNF122	0.0604303
PRIM1	0.0604
PIM1	0.0603961
CYP26C1	0.0603842
PAFAH2	0.0603514
FGFBP2	0.0603428
ZNF418	0.0603357
GPR52	0.0603253
CD160	0.0603132
APOC4	0.060295
FAM92B	0.0602843
FNDC7	0.0602726
SMCP	0.0602601
SLC10A6	0.0602552
PEX5L	0.0602533
C17orf97	0.0602484
LRRC6	0.0602139
C11orf91	0.0602012
MKS1	0.0601876
ZSCAN1	0.0601601
CLIC3	0.0601314
MYH13	0.0601233
PER2	0.060091
STK19	0.0600875
COG1	0.0600741
ASXL2	0.0600577
ZNF688	0.0600548
FAM155A	0.0600379
PSMD8	0.0600344
KCNAB3	0.0600312
BMP7	0.0599418
SFRP2	0.0599333
STRA6	0.059933
SYNPR	0.0599229
DLGAP4	0.0599051
HIC1	0.0599044
PAFAH1B2	0.0599027
TSGA10IP	0.0598991
IL2RB	0.0598727
PRKAR1A	0.0598685
ARHGEF7	0.0598531
RHEBL1	0.0598209
HSBP1	0.0598153
HSPA2	0.0597825
MYBPHL	0.0597706
AATF	0.0597674
SGCB	0.0597652
C6orf106	0.0597648
RERG	0.0597642
HNRNPA0	0.0597621
SALL4	0.0597336
VWA5B1	0.0597203
VRK2	0.0597052
SURF4	0.0597043
DTHD1	0.059699
PCBP3	0.0596987
NOP2	0.0596985
ASAP3	0.0596388
CLCNKA	0.0596344
GCNT7	0.0596163
FABP5	0.0596061
ERGIC1	0.0596059
SNCG	0.0595814
CILP2	0.059576
ANXA3	0.0595733
PXK	0.0595687
RHPN2	0.0595564
ACADS	0.0595177
TRIM4	0.0594991
RSPH4A	0.0594866
GUK1	0.0594816
EDN3	0.0594366
BCCIP	0.0594116
FOXRED1	0.0593983
SP7	0.0593965
ICMT	0.0593871
ISL2	0.0593821
LY6K	0.0593571
SPNS3	0.0593449
EMX1	0.0593369
SLC7A5P1	0.0593227
USH1C	0.0592928
LCORL	0.0592699
C6orf201	0.0592526
TMEM55B	0.0592397
ABAT	0.059229
MPDU1	0.0591826
PPCS	0.0591612
CCL25	0.0591501
TRIM39	0.0591442
SLC35D3	0.0591197
TOX	0.059107
HN1L	0.0590797
SNX6	0.05905
SLCO2B1	0.0590269
RNASEH1	0.058997
TTC9B	0.058995
ATP6V0A2	0.0589699
CCND2	0.0589696
FSIP1	0.0589589
GABRR2	0.0589531
SLC12A2	0.0589391
CDC26	0.0589221
HOXA5	0.0589207
C12orf45	0.0589181
ANGPTL4	0.0589071
DUSP23	0.058888
RNF8	0.0588625
PDE1C	0.0588605
CSPG4	0.0588549
CNTN2	0.0588401
GPR148	0.0588147
RNF19A	0.058805
FOLR3	0.0587775
PARP15	0.0587724
EIF4E3	0.0587712
PDK4	0.0587457
IMPACT	0.0587401
SDHAP1	0.058712
NR1D2	0.0587101
RGPD2	0.0587042
ZNF248	0.0587038
HIST1H2BD	0.0587
PINK1	0.058677
HGSNAT	0.0586622
UMODL1	0.0586552
ESPNL	0.0586401
DPRX	0.0586255
UNC50	0.0586098
SLC43A1	0.0585961
FAM47E	0.058589
B3GALT2	0.0585696
ALOX12P2	0.0585656
ZNF837	0.0585501
SNAP29	0.0585473
ZP1	0.0585306
GPR12	0.058516
SRP9	0.0584836
ZPBP	0.0584809
RNASE1	0.0584793
DAAM2	0.0584675
DNMT3B	0.0584649
ITGAV	0.0584087
IFITM4P	0.0584029
NRXN2	0.0583986
SLC4A11	0.0583972
TMEM233	0.0583948
FABP7	0.0583497
DYNLL2	0.0583406
CTBP2	0.0583192
KLHL24	0.0583021
RET	0.0582614
KLHDC7A	0.0582567
HARS	0.0582437
ZFAND5	0.0582181
BMPR1B	0.0582159
RALY	0.0582092
S100A5	0.058202
HIST1H3H	0.05819
SCAMP5	0.0581532
CDK7	0.058143
NAPEPLD	0.0581178
NID2	0.0580836
ZNF229	0.0580826
GUCY1B3	0.0580596
GRM6	0.0580479
TAF11	0.0580405
KRT86	0.0580394
ZNF860	0.0580209
ENGASE	0.0580114
ADD3	0.0580088
A4GALT	0.0579992
CIRBP	0.0579958
ZNF589	0.0579567
WNT8A	0.0579494
RDH13	0.0579367
LEP	0.0579282
TMC5	0.0579254
SERPINE1	0.0579218
PDGFRA	0.057893
CACNA1I	0.0578822
SLAMF1	0.0578779
AKR1C2	0.0578408
CHRND	0.0577954
REL	0.0577903
CRABP1	0.0577824
FZD10	0.0577769
ARFGAP3	0.0577729
FBP1	0.057741
MS4A10	0.0577385
SLC30A6	0.0577354
GCLM	0.0577339
OXSR1	0.0577216
ZNF236	0.0577117
NTNG2	0.0577114
MT1H	0.0577074
DCTN1	0.057678
LMAN1L	0.0576585
NUDT12	0.0576569
HOOK1	0.0576342
FBXO4	0.0576273
RELL1	0.0576249
GUF1	0.0576205
MNX1	0.0575981
MTHFSD	0.0575404
WDR25	0.0574887
DNA2	0.0574885
POTEF	0.0574828
DTNA	0.0574755
GABPB1	0.0574604
ZNF335	0.0574483
HAPLN4	0.0574472
C1orf94	0.057425
RNF175	0.0574108
INSL3	0.0573899
KRT79	0.0573545
SMARCE1	0.0573407
LYRM4	0.0573209
SLITRK3	0.057296
NDUFS2	0.0572855
AP3B1	0.057273
ERCC1	0.0572499
MC2R	0.0572466
CACNG3	0.0572459
SPG21	0.0572321
SRGN	0.0572241
LRRC10B	0.0572112
SKAP1	0.0571673
SELENBP1	0.0571652
SPOCD1	0.057165
ANKRD11	0.0571608
GLTSCR1	0.05716
TFAP2E	0.0571183
POP7	0.0570588
MAPRE1	0.0570422
CD164L2	0.0570231
KIF21B	0.0570051
DOLK	0.057002
BBX	0.0569946
TRAF5	0.0569894
SLC4A10	0.0569871
MTF1	0.0569783
COPS7A	0.0569546
HSF4	0.0569433
OPTN	0.0569401
CIB1	0.0569364
SUPV3L1	0.0569364
IGFBP4	0.0569226
TRIM45	0.0569103
HIST1H4H	0.0569101
URGCP	0.0569009
DIO3	0.0569002
MAGEL2	0.0568959
PWWP2A	0.0568916
PCSK2	0.0568874
TRPM1	0.0568747
AXL	0.0568731
ADCK2	0.0568729
DGCR6L	0.0568707
BMP8A	0.0568479
CD44	0.0568292
TRIB1	0.0568182
BPI	0.0568174
PREB	0.0568098
BNIP1	0.0567809
IPO8	0.0567704
CBX8	0.0567357
NCAPG2	0.0567266
NRSN1	0.056725
TAOK1	0.0567217
SNAPC4	0.0567204
GDPD1	0.0567137
MAT2B	0.0566927
PSMA4	0.0566918
CABP1	0.0566607
FAM102A	0.0566542
CROCC	0.0566478
TREM1	0.0566466
CHIT1	0.0566139
CLVS2	0.0566131
CDC25B	0.056612
SOX13	0.0566103
ZNF177	0.0566006
SPEF2	0.0565868
KIAA1024	0.0565864
ABHD15	0.0565799
CDRT15	0.0565575
FLOT1	0.056556
NEUROD1	0.0565255
DAGLA	0.0565097
PNLIPRP1	0.0564886
EXOSC2	0.056486
SPTLC1	0.0564847
ZNF385B	0.0564664
FAM83D	0.0564536
CTSW	0.0564532
RGS1	0.0564317
XRCC2	0.0564232
NOL4	0.0564039
SLC39A1	0.0563933
ID1	0.0563827
THAP1	0.0563757
PATE3	0.0563612
ELMOD2	0.0563585
PLAT	0.0563546
HOXC8	0.0563452
LYRM1	0.0563411
DNAJC18	0.0563289
C2CD4B	0.056313
SLC22A1	0.0563112
CD9	0.0563094
MMP26	0.0562795
CYP4F22	0.0562666
SNRNP25	0.0562635
OR8S1	0.0562454
DCT	0.0562357
CDKN2AIP	0.0562227
AIPL1	0.0562081
ZNHIT3	0.0561956
AK7	0.0561891
AIRE	0.056183
IL12A	0.0561731
MED16	0.0561697
NEIL1	0.0561653
ABCC10	0.0561533
REST	0.0561532
SLC4A2	0.0561474
SLC35F5	0.0561118
FOXE1	0.056105
MELK	0.0560899
GALC	0.0560881
TREM2	0.0560819
CCL13	0.0560771
ZMYM2	0.056072
LPIN2	0.0560643
SLC39A2	0.0560556
EVX1	0.0560407
STAT3	0.0560394
PHF14	0.0560125
ZFYVE27	0.0560122
BHLHA15	0.0560093
NEUROG3	0.0559988
GNB1L	0.0559854
DPPA5	0.0559835
IL18BP	0.0559691
AVEN	0.0559673
ZNF570	0.0559654
MYH10	0.0559602
BAX	0.0559541
MORC3	0.0559461
POM121L9P	0.0559356
RASD1	0.0559249
KLHL14	0.0559239
ZNF257	0.0559159
FIGN	0.0559036
EIF3M	0.0558984
FJX1	0.055886
SEC22A	0.0558736
NRP2	0.055872
NDUFC2	0.0558651
PHKG1	0.0558638
ANKRD33	0.055861
BEGAIN	0.0558591
SNX29	0.0558507
CYP4V2	0.0558421
GRID2	0.0558407
NMU	0.0558396
TOX2	0.0558375
MRPL11	0.0558346
TIGD3	0.0558289
IRGC	0.0558136
TEC	0.0557963
PDZK1IP1	0.0557855
ABCG8	0.0557734
CCDC61	0.0557628
RAB6B	0.0557573
GORASP2	0.0557501
FAM171A2	0.0557435
SLC9A3R1	0.0557179
JAKMIP2	0.0557101
CLSTN3	0.0556961
ROR2	0.0556918
RAB11FIP3	0.0556465
CALCOCO1	0.0556333
EPHA10	0.0556016
PDE4A	0.055596
KCTD14	0.0555884
OLFM3	0.0555876
BTN3A2	0.0555846
SYCN	0.0555717
LCN8	0.0555702
GRB14	0.0555408
PAX7	0.0555368
COX6B2	0.0555276
SULT6B1	0.0554561
DUSP15	0.0554537
FTH1	0.0554471
NRAS	0.0554209
IGFBPL1	0.0554104
KHDC1L	0.0554074
CD68	0.0554012
KIAA1324L	0.055377
RBM45	0.0553669
PCDH9	0.0553643
DSPP	0.0553589
GALNT12	0.0553527
FLCN	0.0553456
ABHD4	0.0553312
DPH2	0.0553135
SERPINB9	0.0552964
C1orf53	0.0552538
DYRK4	0.0552093
PTGR2	0.0552089
KRTAP17-1	0.0551833
DCLK1	0.0551828
OR2L13	0.0551819
ZNF639	0.0551632
PHKG2	0.0551511
SLC9A3	0.0551435
ZNF586	0.0551379
MARCKS	0.0551177
LILRA4	0.0551065
NOMO1	0.0551021
UBE2I	0.0550828
RBM24	0.0550809
ITGA8	0.0550744
PARD3B	0.0550721
G6PC2	0.0550684
EPB42	0.0550628
CDKN1C	0.0549957
KCNA5	0.0549859
PDE6G	0.0549846
SDHAP3	0.05498
ACR	0.0549748
SAG	0.0549648
ATP1B2	0.0549515
HLTF	0.0549414
FAM71E2	0.0549333
FNDC3B	0.0549301
PRB4	0.0549215
HAGHL	0.0549184
FAM170B	0.054839
SDK1	0.0548371
ALKBH2	0.0548225
MARCO	0.0547972
MIXL1	0.0547822
PKIG	0.0547708
TMEM131	0.0547519
SERPINB13	0.0547432
PAK1	0.0547422
TERF1	0.0547402
APOL1	0.0547158
NPC1	0.0546975
MED24	0.0546748
CHGA	0.0546689
IL17A	0.0546668
HOXA4	0.0546619
ICAM3	0.0546463
CCDC50	0.054636
CREG2	0.0546312
ZNF500	0.0546177
MPPED2	0.054598
TATDN2	0.0545767
PROX1	0.0545727
KCNK6	0.0545656
SCG5	0.054556
KLF5	0.0545424
RYR3	0.0545379
HOXD1	0.0545203
GDE1	0.0544997
DEFB126	0.054488
DBN1	0.054477
HMGXB4	0.054417
LRRC36	0.0544163
HUS1	0.0544088
PDE3A	0.0544019
GLRA1	0.0543851
PSMC4	0.0543718
USP4	0.0543615
SLITRK1	0.0543543
ZNF410	0.0543527
STAMBPL1	0.0543335
COL28A1	0.0543329
SMAD2	0.0543286
PYROXD2	0.0543137
TNFRSF21	0.0543065
MCF2L2	0.0543059
PCK1	0.0542852
ERN1	0.0542802
OPRM1	0.0542786
EFR3B	0.0542565
ZNF823	0.0542417
TUBB8	0.0542407
C4orf32	0.0542357
GRIK1	0.0542237
CALML6	0.0542102
CEP164	0.0542015
TSNAXIP1	0.0542006
EDNRA	0.0541894
KCNK2	0.0541857
VPS54	0.0541786
ECD	0.0541512
HSPA1A	0.0541492
TTLL7	0.0541399
SIRPB1	0.0541369
EIF2AK3	0.0541219
RFTN2	0.0541167
COMMD7	0.0541096
ADORA2B	0.0541058
FASTKD5	0.0541053
DCAKD	0.0540538
ZNF254	0.0540525
HECW1	0.0540406
SP6	0.054038
KRT75	0.0540122
ZFAND2A	0.0540102
CHAD	0.0540049
MMP13	0.0539787
CEBPB	0.0539134
TMTC2	0.05387
BRWD1	0.0538583
PSMB5	0.0538489
SPATS2	0.0538404
GPR4	0.0538373
DEDD	0.05383
RPP25	0.0537914
JUNB	0.0537849
C5orf56	0.053755
RASEF	0.053727
MAP2K5	0.0537203
INPP5E	0.05372
SCNM1	0.0536991
OR13J1	0.0536948
PIGX	0.0536792
CATSPERB	0.0536706
TXNIP	0.0536445
OTOP2	0.0536295
S100A10	0.0536235
SCN4A	0.0536055
FBXO27	0.0535561
KCNIP2	0.0535522
C6orf141	0.0535502
CLDN7	0.0535338
WDR31	0.0535226
CCND1	0.0535224
SFMBT2	0.0535103
ACAA1	0.0535091
ZFYVE1	0.0535074
CABYR	0.0534936
TMEM229A	0.053488
HLA-DQA2	0.0534872
MED18	0.0534865
ATOH7	0.0534149
LLGL1	0.0533909
ADA	0.0533584
C1QTNF4	0.0533435
CSMD1	0.0533157
RASD2	0.0533139
IFNAR2	0.0533053
POFUT1	0.0532943
CPSF1	0.0532714
IQCB1	0.053243
GPR55	0.0532429
KCNJ10	0.0532269
GLB1	0.0531928
BIRC7	0.0531856
CARD10	0.0531852
ZBTB47	0.0531765
HABP4	0.0531619
BOLA1	0.0531552
TSTD1	0.0531455
TMPPE	0.0531447
SLC19A2	0.0531357
USP15	0.0531282
SAP18	0.0531096
SLC1A3	0.0530984
CCT6B	0.0530929
C18orf32	0.0530917
OR6M1	0.0530896
ZNF426	0.0530788
RAP1GDS1	0.0530747
UNK	0.0530674
PNKD	0.0530216
OAZ1	0.0529989
SEMA6A	0.0529984
SLC2A9	0.052994
COL11A1	0.052986
USP21	0.0529827
PLCH1	0.0529756
TMEM225	0.0529721
LMBRD1	0.0529381
PAX2	0.0529181
NSUN2	0.0529163
GLRX5	0.0529135
GRHL3	0.0529081
FAM19A1	0.0528868
PLA1A	0.0528761
FGF20	0.0528716
OR10AD1	0.0528695
SLC16A13	0.0528498
ZNF813	0.0528439
ILF2	0.0528231
FAM178B	0.052808
CD38	0.0528074
2023-03-04	0.0527792
PEX11A	0.052775
MYO18A	0.0527668
SCGB1D1	0.052764
EME1	0.0527401
SIKE1	0.0527344
ATL1	0.0527262
ARMS2	0.0527201
SLC6A5	0.052706
SLC5A7	0.0527032
RHBDL1	0.0527015
VGLL2	0.0526618
IFI6	0.0526504
NUP93	0.0526492
PRDX1	0.0526351
NDFIP2	0.0526314
BAIAP2L2	0.0526215
TEKT1	0.0526209
SLC45A1	0.0526074
HGF	0.0526059
POU6F2	0.0525977
RAD52	0.052581
LSR	0.0525785
MYBPC2	0.0525567
LFNG	0.0525344
PHB2	0.0524805
ADRA2C	0.052478
ACPT	0.0524728
WFS1	0.0524695
INPP1	0.0524492
ZGLP1	0.0524276
ARL13B	0.0523964
OGFRL1	0.0523781
ZNF766	0.0523769
USP10	0.0523745
FMOD	0.0523739
SRRM4	0.0523713
MCM10	0.0523647
MSLN	0.0523517
GSDMD	0.0523439
SPAG16	0.0523257
KRTAP5-8	0.0523244
NRIP2	0.0523209
OXR1	0.0523008
MSLNL	0.0522817
PRSS36	0.0522542
RPS20	0.0522474
CAND2	0.0522105
TRUB1	0.0521974
GLT6D1	0.05216
WDR77	0.052156
NAPSA	0.0521544
PSRC1	0.0521487
PSG3	0.0521135
CRYBA1	0.0521042
ERBB3	0.0520901
ST6GAL2	0.0520826
TMBIM1	0.0520678
SPTB	0.0520644
HSPB9	0.0520458
NAPSB	0.0520318
GPR61	0.0520201
DCBLD2	0.0520013
LAMB2	0.05195
GLI1	0.0519403
TNNI1	0.0519401
C3orf14	0.0519308
HAS2	0.0519243
CDKN2C	0.0519225
DMWD	0.0518988
FBXO2	0.05188
LPA	0.0518674
MYADML	0.051864
MPZL2	0.0518628
FGF11	0.0518584
COPG2	0.0518582
BTF3L4	0.0518569
CCDC33	0.0518494
HPGD	0.0518392
IRF8	0.0518008
FUT2	0.0517795
C11orf53	0.0517702
B3GNT3	0.051762
FRS2	0.0517548
ITIH1	0.0517448
C2CD4C	0.0517368
CLEC17A	0.0517033
DMKN	0.0517014
NPLOC4	0.0516965
HPD	0.051691
FFAR1	0.0516907
STK17B	0.0516859
CPNE9	0.0516774
ZNF550	0.0516653
IMMT	0.0516445
SPR	0.0516367
CNTNAP1	0.0516355
JOSD1	0.0516278
OTUD4	0.0516246
RSPO4	0.0516217
SH3BP5	0.0516028
AGAP5	0.0516006
GABRP	0.0515989
TOR1AIP1	0.0515833
PPP1R14A	0.0515806
CNDP1	0.0515681
FAM163B	0.0515568
TSHZ2	0.051553
GDF9	0.0515493
CMIP	0.051537
BCKDHA	0.0515312
TRIM58	0.0515219
TRIM50	0.0514955
FDFT1	0.051492
DTNBP1	0.0514875
CMBL	0.0514702
TMEM132E	0.0514682
CTXN1	0.0514665
ACADL	0.051456
NF1	0.0514299
RANGRF	0.051422
RHBDD2	0.0513982
RPL23AP7	0.0513976
AIG1	0.051387
DRAM1	0.0513854
PROK1	0.0513757
SGPL1	0.0513662
TRAPPC6B	0.0513647
BRSK1	0.0513544
ASTN2	0.0513469
RAG1	0.0513456
PLA2G5	0.0513383
GNMT	0.0513382
HOXD9	0.0513161
SLA	0.0513138
HCFC2	0.0513136
POLRMT	0.051285
SERAC1	0.0512844
CPLX2	0.0512523
FN3KRP	0.0512372
EGR3	0.0512365
SIGLEC12	0.0512319
MYBL2	0.0512119
EEF1E1	0.0512101
METTL5	0.0512073
NINJ1	0.0511635
IL17RB	0.0511577
LCNL1	0.0511407
SIX3	0.0511023
ZNF577	0.0510979
ABTB2	0.0510882
ASPDH	0.0510828
RPUSD4	0.051081
ROBO1	0.051079
SNAP91	0.0510783
ACBD7	0.0510756
PPM1F	0.0510693
SEC14L1	0.0510669
PRMT2	0.0510581
STAM2	0.0510574
SLFN12	0.0510488
RPL6	0.0510399
PTGER3	0.0510382
CA7	0.0510178
LIPG	0.051008
CCDC124	0.0510004
PPM1M	0.0509972
FAM166A	0.0509666
ZNF320	0.0509453
ALDH9A1	0.0509257
GAS2L3	0.0509199
RSAD1	0.0509198
UBE2B	0.0509151
KCNJ9	0.0508949
LGALS12	0.0508892
ACTL7B	0.0508848
SEMA4B	0.0508694
TRPV2	0.0508688
C5orf47	0.0508553
HSPA12A	0.0508492
SLC1A7	0.0508371
ERBB2	0.0508243
LCE1E	0.0507964
IER5L	0.0507942
MRO	0.050794
ACAP3	0.0507901
HEXA	0.0507718
TMEM222	0.0507632
NHLRC4	0.0507242
IHH	0.0507206
FAM8A1	0.050711
PAM	0.0507076
CDK6	0.0507002
NME5	0.0506999
COG8	0.0506699
DOK4	0.0506569
ALDH3B1	0.0506224
C22orf42	0.0506027
FTCD	0.0506024
WDR11	0.0506005
FAM189A2	0.0505949
GSTO1	0.050581
DTX4	0.0505805
LHX6	0.0505639
RGS9	0.0505177
HRNR	0.0505123
AGBL5	0.0505053
ARID5B	0.0504916
GSG1L	0.050474
TMEM38B	0.0504559
CDADC1	0.0504516
ARL8A	0.0504509
POU2AF1	0.0504476
WFDC9	0.050441
CLYBL	0.0504403
GTF2E1	0.0504149
SLC27A1	0.0504034
CSGALNACT1	0.0503828
LUZP2	0.0503822
SUSD5	0.0503713
AOX2P	0.0503334
BMP3	0.050324
UBE2G2	0.0502912
OLFM2	0.0502877
PIK3R3	0.0502822
SNAP25	0.0502761
TMEM231	0.0502759
HEPACAM2	0.0502705
FAM43A	0.0502553
CCDC62	0.0502452
LTB	0.0502417
CACHD1	0.0502394
PRPSAP2	0.0502287
SLURP1	0.0502265
[truncated: 10,002 more rows]

## Sheet: Supplementary Table 4
Supplementary Table 4. Feature importance analysis for Pulmonary fibrosis case-control classifier.
Gene	SHAP
EYA4	0.0172903
EDA2R	0.0143344
PTCHD4	0.0142781
RANBP17	0.00861862
SLC6A15	0.00765368
GTF2IRD2	0.00692415
PCDHGB6	0.00590259
CCDC144A	0.00577305
TDRD9	0.00564358
ZNF518B	0.0054062
ZNF208	0.00530804
ALX1	0.00522264
EPHA6	0.00508609
SEMA3E	0.00503535
CLEC5A	0.0049576
MKRN3	0.0048506
GREM2	0.00467896
POU3F4	0.0046759
CSPG4P5	0.00437853
POMC	0.00436204
ZMAT3	0.00427208
CDH10	0.00419767
LMO3	0.00407104
ZNF300P1	0.00402029
PCDHB4	0.00401115
LRRN3	0.00387669
SRY	0.00383733
LHFPL4	0.00382374
C2	0.00364068
PCDHB3	0.0036331
KDM5D	0.00358978
ADAM12	0.00356455
C20orf202	0.00355868
CDKN2A	0.00347605
KRTAP5-2	0.00343271
CECR7	0.00339629
SOX14	0.00339185
GPR21	0.00337304
ZNF93	0.00336114
GDF15	0.00325384
IGF2BP1	0.00322976
SPG21	0.00321452
PLXDC1	0.00319637
ZNF215	0.00319411
EMC10	0.00317604
ROBO2	0.00315754
ESM1	0.00306887
ZNF77	0.00305895
ACE2	0.00303893
CCZ1	0.0030247
REG4	0.00301982
GFRA3	0.00300528
FRMD7	0.00296665
NEFH	0.00296175
HTN3	0.00294443
ASXL3	0.00292819
DNLZ	0.00291879
GSTT2	0.0029172
MYLK4	0.00290613
MRGPRX2	0.00289828
NBPF3	0.00289821
NEUROG2	0.00289063
SCML2	0.00284194
PCDHB2	0.00283942
DDX11L2	0.00279699
RFPL3	0.00279508
ABCB5	0.00278551
LINGO3	0.00278435
PLAG1	0.00277622
APLNR	0.00275862
LRRC37A2	0.00275153
CAPN6	0.00274972
JADE2	0.00272781
SLC25A2	0.00271771
SPRN	0.00271188
ZC2HC1B	0.00269757
ZNF682	0.00269614
KCNS1	0.00269004
FMR1NB	0.00268087
TUBAL3	0.00267654
SPATA31C2	0.00266001
CILP2	0.00265292
TSGA10IP	0.00264048
TRIM58	0.00262516
GAPT	0.00261467
ADORA3	0.00260847
MOV10L1	0.00260622
EPHA5	0.00257933
FAM106A	0.00257858
FAM118A	0.00256389
ADRA2B	0.00256134
OPN5	0.00253902
OSTCP1	0.00253573
MORC1	0.00253058
CLIC2	0.00251595
IFNA5	0.00250857
STK19	0.00250663
TIPIN	0.00249879
TAS2R50	0.00249109
HLA-DRB6	0.0024883
PIWIL2	0.00248553
C5orf47	0.00248549
FBLL1	0.00247199
CTSG	0.00247033
ZNF556	0.002464
SPINK2	0.00244704
IFI44L	0.00244397
ZFY	0.00243088
L3HYPDH	0.00241546
PCDHA10	0.00240875
HTRA4	0.0024005
CDRT15	0.00237834
POTEKP	0.00236757
LCN10	0.00235282
GP5	0.00234834
PSG11	0.00232851
LRRC74A	0.00232735
GSTM1	0.0023266
SOX3	0.00229058
MMP8	0.00228826
ECEL1	0.00228777
FBXW4P1	0.00228284
HCG27	0.00227654
TMEM26	0.00227452
LHX5	0.00225752
ZNF549	0.00225322
RORB	0.00224015
FOSB	0.00223451
TFRC	0.00222014
GPR31	0.00220906
ZNF808	0.00220516
FAM90A1	0.00219954
TFG	0.00219918
BIRC7	0.00218813
GUCA1A	0.00218669
PRAME	0.00217746
LENEP	0.00217681
KLRF1	0.00216669
AEN	0.00216478
SHOX	0.00216443
MPL	0.00216238
MUC3A	0.00216098
THNSL2	0.00216083
IGHG1	0.00215922
DACH2	0.00215631
PYHIN1	0.00214812
PRB4	0.00214684
FCGR3B	0.00213493
XCL1	0.00212736
PCDHA2	0.00212599
CCR4	0.00212562
ISL1	0.00212144
AMBN	0.00211371
BRINP1	0.00210795
ATP23	0.00209915
CLEC4M	0.00209873
SIK1	0.00209511
TSGA13	0.00209462
ZIK1	0.00209249
AGAP9	0.0020906
CYP3A7-CYP3A51P	0.00208729
IGLL1	0.00208645
ATF7IP2	0.00208604
CCDC184	0.00207141
LRRC52	0.00207114
TMEM31	0.00206941
PDE4A	0.00205816
VENTX	0.00205161
CRYGN	0.00204909
HBZ	0.00204209
TAF1L	0.00203961
EYA2	0.00203887
IGSF22	0.00203772
TNFRSF17	0.00203742
PCDH17	0.00203659
MMP1	0.00202602
SLC14A1	0.0020182
FIGN	0.00201729
CNDP1	0.00201397
GUCA1B	0.00200507
FMO3	0.00199678
C17orf97	0.00199186
BSND	0.00198969
CLCA3P	0.00198901
NOG	0.00198877
HES5	0.00198548
NYAP2	0.00197273
NANOG	0.00197248
CYP1A1	0.00196339
CORT	0.00195034
GNRH2	0.00194779
OR2H1	0.00194639
RPGRIP1	0.00193906
CXorf58	0.00193737
RPS16P5	0.00193484
NPPC	0.0019334
MLN	0.0019334
AHRR	0.00193313
ZPLD1	0.0019234
KRTAP4-4	0.00192331
PCDH9	0.00191784
BLID	0.00191581
RAD21L1	0.0019155
EGR4	0.00191069
GNB1L	0.00190924
PCDHA5	0.00190318
GLI4	0.00190306
LOXL4	0.0019025
ZFP57	0.00190182
UBBP1	0.00189953
SYCP1	0.00189725
ACKR1	0.00189402
NKAP	0.00189348
PRM2	0.00189171
OTUD7A	0.00189029
EPHX4	0.0018894
GPAT4	0.00188872
TNFSF18	0.00188715
FAM9C	0.00188582
DAOA	0.00188424
REN	0.00188261
ARMC10	0.0018803
PTH2	0.0018803
ZNF683	0.00187959
KLRD1	0.00187571
SYCE3	0.00187527
KLHDC7B	0.00187431
GAS2L2	0.00187342
HSF5	0.00187167
PRSS21	0.00187063
HLA-G	0.00186814
MIXL1	0.00186138
CYP2A7	0.00185983
DDB2	0.00185965
CHRNA9	0.00185855
RABGGTB	0.00185404
INTS4P1	0.00185381
NOXO1	0.00185242
CRABP1	0.00185127
PRKAR1AP1	0.00184871
SYT15	0.0018446
CTAG2	0.00184207
USP32P2	0.00184193
PWP2	0.00184126
ADM5	0.00183959
HRH4	0.00183865
HSD11B1	0.00183721
FAM124B	0.00183677
WNT8A	0.00183265
C17orf98	0.00182989
KLHL21	0.00182887
RBM11	0.00182885
NAP1L2	0.00182656
F8	0.00182607
WDR97	0.00182296
TMEM217	0.00182121
LDHC	0.00181901
LINC00674	0.00181812
FUT5	0.00181811
FSCN3	0.00181726
AGAP4	0.00181598
SRP9	0.00181299
SNX31	0.00181077
SIGLEC7	0.00180935
GPHA2	0.00180851
NUP85	0.00180803
TMEM235	0.00180759
PALD1	0.00180685
AOX2P	0.00180299
FGD2	0.00179593
CELA2B	0.00179497
OOEP	0.00179261
USH2A	0.00179021
TLX3	0.00178374
GTF2H2B	0.00178345
ACRV1	0.00178118
CTAGE11P	0.00177944
DNASE1L3	0.00177558
SPESP1	0.00177541
GRTP1	0.00177391
GPR55	0.00177387
OR3A3	0.00177286
BCORP1	0.00177252
ACYP1	0.00177055
UTS2B	0.00176836
KIF15	0.00176747
GRK7	0.0017642
TENM1	0.00176108
PLA2G4C	0.00175846
PSG7	0.00175698
HRK	0.00175661
ZNF254	0.00175352
NBEAP1	0.00175111
APIP	0.00174853
CRLF1	0.00174796
IL23R	0.00174795
COL23A1	0.00174782
PSG9	0.00174762
IRGC	0.00174523
DDIT4L	0.00174391
MICB	0.0017434
ZNF229	0.00173353
CFAP57	0.00173275
PIEZO2	0.00173189
ANXA2P3	0.00173097
ATG10	0.00172694
MRPS21	0.00172379
GPR153	0.00172257
ZG16B	0.00172216
ARHGAP28	0.00172064
NEUROD4	0.00171928
ACTG1P17	0.00171504
GUCY2C	0.00171481
CCDC181	0.00171326
MESP2	0.00171247
IL12RB2	0.00171195
AIRE	0.00170402
RNF114	0.00170263
BEND4	0.00170117
NPAS2	0.00169674
GHRL	0.00169503
NXF3	0.00169416
SLC5A11	0.00169297
WDR64	0.00169212
SUGT1P3	0.00169097
SP5	0.00169086
CBX8	0.0016892
ATP6AP1L	0.0016878
ANGPTL4	0.00168333
IFNA21	0.00168217
PSG2	0.00167925
NLRP3	0.0016774
AKAP10	0.00167632
OSM	0.0016761
FAM47A	0.00167476
SELE	0.00167421
OR2F2	0.0016713
ENPP7	0.00167042
GPR27	0.00166638
SLC25A44	0.0016641
IGDCC3	0.00166138
SLC35G3	0.00165987
FREM3	0.00165894
GPRC5D	0.0016583
RTP5	0.00165764
CES1P1	0.00165565
FRG1EP	0.00165551
FOS	0.00165398
OR2C1	0.00165185
FBLN7	0.001649
FAM133A	0.00164852
NBPF4	0.0016479
SNTG1	0.00164176
TAF1B	0.00163968
TRIM22	0.00163926
ZNF575	0.00163912
NAA11	0.00163911
OR2S2	0.001636
NACA2	0.00163583
GLB1L3	0.00163475
MDGA1	0.00163454
GPR82	0.00163217
SYCE1	0.00162931
PGBD4	0.0016288
OR10A4	0.00162845
ELSPBP1	0.00162843
GBX2	0.00162655
WFDC8	0.00162568
HSD17B12	0.00162229
ART5	0.00161997
NKAPL	0.00161885
TNMD	0.0016157
CCT8	0.00161381
E2F7	0.00161364
GPR174	0.0016136
MTO1	0.00161357
EFNA2	0.00161307
SPATA32	0.00161113
HCG22	0.00161046
DNTT	0.00160996
TSPYL2	0.00160983
SCT	0.0016098
TRH	0.00160968
LIPJ	0.00160926
EDDM3B	0.00160392
PHF10	0.0016025
PEX6	0.00160081
NAGS	0.00159868
HBB	0.00159376
BMP6	0.00158965
HSD17B14	0.00158949
TSPO2	0.00158334
TGM4	0.00158301
VRTN	0.00158258
WNT9B	0.00158186
MC5R	0.00157786
IL25	0.00157713
CYP46A1	0.00157554
ZNF252P	0.00157477
NAPRT	0.00157309
KCNA10	0.00157275
SCIN	0.00157152
C10orf62	0.00156898
TAS2R16	0.00156827
AMER2	0.00156813
CRYBB3	0.00156787
RNF17	0.00156676
PSPC1	0.00156667
C6orf15	0.00156434
COL20A1	0.00156099
RP1L1	0.00155732
CST2	0.00155514
LRRC3	0.00155231
NDUFA4L2	0.00154996
ZNF180	0.00154919
PRM1	0.00154685
RNF148	0.00154657
MMEL1	0.00154623
PCDHGB7	0.00154584
HTR3A	0.00154463
LIN28A	0.00154243
OR2A4	0.00154032
DMRT1	0.00154011
NLRP9	0.00153822
C1orf167	0.00153613
SLC22A2	0.00153578
GPR52	0.00153484
CXCL13	0.00153447
SMAD6	0.00153323
TRPM1	0.00153214
GALR1	0.00153115
SCN3A	0.00153115
PCDHB8	0.0015234
TAS2R9	0.00152273
SLC38A11	0.00151787
ANKRD55	0.00151565
PRAMEF12	0.00151511
SLC22A13	0.00151451
GJA3	0.00151307
WBP1L	0.00150513
ANKRD20A11P	0.00150511
GAGE1	0.00150439
IL5RA	0.00150378
KRTAP13-1	0.00150376
NEFL	0.00150141
GUSBP1	0.00150129
MRPL23	0.00150029
CSMD1	0.00150028
NOX5	0.00149976
TMEM200C	0.00149884
MIPEPP3	0.00149801
CACNG3	0.00149787
CXCR3	0.00149596
KIRREL2	0.00149578
CCNA1	0.00149473
PRR16	0.00148904
CLDN19	0.00148764
PRPS1L1	0.00148676
ADCY10P1	0.00148667
COLQ	0.00148651
ZNF514	0.00148649
KCNG4	0.00148609
PPIL3	0.00148512
ZPBP2	0.001485
HSD3B1	0.00148225
LCNL1	0.00148182
LY6K	0.00148091
TM4SF18	0.00148075
TAS2R38	0.00147986
OR3A1	0.00147958
RHBDL3	0.00147835
CADM3	0.00147506
DCAKD	0.00147496
MS4A5	0.00147298
FCRL4	0.0014728
ZSCAN10	0.00147152
LINGO2	0.001471
DLX2	0.00146854
CAPN12	0.0014668
GPR50	0.00146667
XKR6	0.00146641
ZNF23	0.00146463
SALL3	0.00146395
SND1	0.00146265
CEP192	0.00146223
ALPP	0.00146161
C7orf77	0.00146096
DGKK	0.00145848
SMC4	0.00145847
TULP1	0.00145812
CD6	0.00145666
PCDHB9	0.00145607
SMIM3	0.00145437
LEXM	0.00145373
L1TD1	0.00145253
FCRL3	0.00145125
ZNF415	0.00145073
SHOX2	0.00144667
SYCP2L	0.00144598
OR7A5	0.00144384
ENTPD2	0.00144221
U2AF1L4	0.00144206
TRAV12-2	0.00143833
PLD6	0.00143708
CDC42EP4	0.00143346
ZNF436	0.00143225
PIWIL1	0.00143114
SPATA45	0.00142937
SKAP2	0.00142878
NLRP5	0.00142753
SORCS2	0.00142676
CNGB3	0.00142634
CALCR	0.00142628
IFNA1	0.00142535
MROH2A	0.00142526
ARHGAP26	0.00142304
HLA-DPB2	0.00142296
TSACC	0.00142229
GNGT1	0.00142227
ZNF589	0.0014221
CCND2	0.00141876
SPSB1	0.00141484
CLIC1P1	0.00141278
LCN15	0.00141256
USH1C	0.00141246
NLRP11	0.00141222
SLC6A3	0.00141191
AXDND1	0.00141165
SULF2	0.00141135
GPR75	0.00141029
CCR8	0.00140824
OPRD1	0.00140811
TSHZ2	0.00140772
ACSM2A	0.00140529
VMO1	0.00140524
TCN1	0.00140377
PLAT	0.00140297
SPATA8	0.00140275
ANKRD33	0.00140251
PSG6	0.00140096
THEMIS	0.0013973
ESR1	0.00139509
ACTL7B	0.00139351
SLC22A3	0.0013921
RIPPLY3	0.0013919
KRBOX1	0.00139172
TYMS	0.00139025
CPNE1	0.00138913
FAM205A	0.00138598
FAM169B	0.00138571
GH1	0.00138416
ECHDC3	0.00138402
PI16	0.00138102
CD1B	0.00138064
BEX5	0.00137963
ADAM21	0.00137899
MAGOH2P	0.00137684
ZNF266	0.00137657
STK32B	0.00137636
CCNYL2	0.0013762
C14orf178	0.00137537
DBIL5P2	0.00137359
TRIM40	0.00137214
SYCE1L	0.00137131
POU4F2	0.00137102
SCART1	0.00137018
CNR1	0.00136667
POU5F2	0.00136523
PCSK1	0.00136502
C4orf45	0.00136454
MTNR1B	0.0013641
FLYWCH1	0.00136238
POU4F3	0.00136138
CCZ1B	0.00136082
DPPA2	0.00135955
DUSP9	0.00135873
SPEM1	0.00135817
SAGE1	0.00135484
CXCL10	0.00135326
KHDC1L	0.00135303
ADAMTS19	0.00135149
SLC30A8	0.00135044
SLAMF9	0.00134843
WNT8B	0.00134779
BTF3P12	0.00134775
CD69	0.00134603
COL5A3	0.00134596
XRRA1	0.00134396
RBM45	0.00134282
CMA1	0.00134197
GOLGA6L2	0.00134196
KCNK13	0.00134132
GREB1	0.00134111
MRPL52	0.00134099
REM1	0.00133879
NR2E1	0.001335
UPF3B	0.00133319
NTRK1	0.00133277
GABRA6	0.00133259
DPYSL4	0.00133209
SMIM21	0.00132993
ODF3	0.0013286
SYT3	0.00132767
MOG	0.00132708
SMCP	0.00132613
GNAT1	0.00132498
POU2F3	0.00132413
OR6B1	0.00132254
PCGF5	0.00132233
PPEF1	0.00131999
ZSCAN12P1	0.00131888
LHFPL5	0.00131836
PLA2G7	0.00131773
CFHR3	0.00131616
OR2F1	0.00131446
IMMP1L	0.00131442
WDR38	0.00131276
IFNW1	0.00131205
ZIC2	0.00131111
TREML4	0.00131093
SP7	0.00131076
UCMA	0.00131018
TP53I11	0.00130596
OMD	0.00130546
TMEM39B	0.00130468
TSC22D2	0.00130406
ZNF223	0.00130341
UBE2U	0.00130191
S100A7A	0.00130157
OR8D1	0.00130146
LRRD1	0.00130142
SOCS2	0.00130097
HMX1	0.00130039
IGKV1OR2-118	0.00129974
MCHR1	0.00129945
LHCGR	0.00129792
SPAG6	0.00129527
CCDC174	0.00129462
ZNF705G	0.00129354
IFNK	0.00129192
NXNL2	0.0012912
SAG	0.00128953
FOXB1	0.00128866
VPS16	0.00128779
SEMG2	0.0012876
MFSD14C	0.00128636
SLC16A8	0.00128352
PCDHB16	0.00128222
MGAT4C	0.00128168
OR51I1	0.00128102
EQTN	0.0012806
GPAT2	0.0012805
SEMA5A	0.00128024
CEP128	0.00128022
MTNR1A	0.00127952
IL17F	0.00127935
TPRXL	0.00127683
ZNF391	0.00127674
OR11A1	0.00127616
SATB2	0.00127483
ZIM3	0.00127413
PARP15	0.00127273
TAS2R13	0.00127184
GTF2IRD2B	0.00126829
PAOX	0.0012681
OR10A5	0.00126786
SIGLEC11	0.00126785
KRTAP3-1	0.00126776
IFNA7	0.00126637
PTGER1	0.00126531
TMEM225	0.00126525
NT5E	0.0012652
INSM1	0.00126435
GALNT13	0.0012639
KCNK2	0.00126249
OR1J4	0.00126018
DDX11	0.00126017
OR1A1	0.00126005
GPR62	0.00125986
KRT37	0.00125781
GLRA1	0.00125744
OPCML	0.00125723
KLK3	0.00125632
SSX3	0.00125533
EEF2	0.00125529
NT5C1A	0.00125493
INSL3	0.00125367
FRMD8P1	0.00125298
GRIN2A	0.0012529
FAM187B	0.0012524
GALR2	0.00125188
FNDC7	0.00125145
KLHL25	0.00125133
HSPB9	0.00125119
FOLH1B	0.00125099
GJA8	0.00124983
TIGD4	0.00124648
VWDE	0.00124638
SLC22A1	0.00124632
PTTG3P	0.00124571
CUX2	0.00124443
LZIC	0.00124416
PSKH2	0.00124368
OVOL3	0.00124358
SIRPD	0.00124313
SIGLEC8	0.00124251
TEDDM1	0.00124231
UBE2NL	0.00123975
MCM8	0.0012392
IZUMO2	0.00123867
PURG	0.0012383
TBRG1	0.00123781
EIF4A2	0.00123767
PAPOLB	0.00123538
TSPEAR	0.00123482
PPEF2	0.00123461
COL28A1	0.00123409
C3orf22	0.00123354
C11orf87	0.00123324
FXYD4	0.00123323
TYRO3P	0.00123075
ZNF24	0.00123074
LYG2	0.00123071
ERCC6L	0.00123048
SLC22A31	0.0012294
BORCS8	0.00122891
RHOXF1	0.00122689
NRK	0.0012265
NLRP4	0.00122543
CCDC105	0.00122478
ID3	0.00122475
TUBB1	0.00122405
RDM1	0.00122315
PRDM15	0.00122263
PSG3	0.00122254
IL5	0.00122253
CNPY1	0.00122214
KCNV1	0.00122214
SSTR4	0.00122184
GIP	0.00122042
AATF	0.0012183
CCDC140	0.00121739
CT62	0.00121481
TMC2	0.00121456
DIRAS2	0.00121455
FOXR1	0.00121407
TRHDE	0.00121343
CLDN23	0.00121249
CRYBA1	0.00121231
RGSL1	0.00121072
SLC28A1	0.00121043
CUZD1	0.00120994
PCDHGB8P	0.00120864
CST1	0.00120823
CCL1	0.00120796
IGHV3-75	0.0012079
SOX11	0.00120761
KCNH7	0.00120757
TUBB7P	0.00120747
TMEM253	0.00120567
FGF8	0.00120541
PIANP	0.00120514
SLC45A2	0.00120494
IGLL3P	0.00120413
SLC4A10	0.00120146
VN1R108P	0.00120061
ZNF595	0.00120059
PSMG4	0.00120051
CYP24A1	0.00119991
SLC6A2	0.00119984
KRTAP9-8	0.00119945
GPX5	0.00119758
TERB2	0.00119745
UNC5D	0.00119714
ELK2AP	0.00119612
UCP1	0.00119587
PKD1L1	0.00119421
KCNK4	0.00119311
C3orf14	0.00119181
HES4	0.00118825
DNMT3L	0.001188
GABRB1	0.00118617
HUS1B	0.00118545
RHD	0.0011849
KLRG1	0.00118441
LTK	0.00118437
OR5V1	0.00118426
MEGF6	0.00118405
CPA6	0.00118375
TRNT1	0.0011834
CLDN20	0.00118335
EIF1AY	0.00118133
PRKXP1	0.00118062
OXT	0.00118025
COG4	0.00117996
GRM3	0.00117992
HNRNPA0	0.00117892
STIP1	0.00117869
TIFAB	0.00117745
VSIG1	0.00117715
GTSF1L	0.00117714
HYDIN2	0.00117712
CALHM3	0.00117643
GPR84	0.00117566
LCT	0.0011744
HTR2B	0.00117428
BCO1	0.00117412
CROCCP2	0.00117329
TMEM61	0.00117155
KLHL3	0.00117126
ACADL	0.0011692
PREX2	0.00116919
TTC9B	0.00116911
C11orf94	0.00116882
KIAA0825	0.00116868
MC3R	0.00116846
MIF	0.00116733
STXBP5	0.00116658
UCHL1	0.00116587
KCNU1	0.00116535
PAGE5	0.00116434
TAL2	0.00116422
SHISA3	0.00116336
PRG3	0.00116242
PITRM1	0.00116228
CYP3A43	0.00116205
ABCA11P	0.00116139
PTPRD	0.0011608
NPIPB15	0.00116031
ZNF560	0.00115904
HENMT1	0.00115872
CBLN3	0.00115869
CT55	0.00115815
MGA	0.00115785
IFNA8	0.00115781
IL22	0.00115748
GBAP1	0.00115552
EVA1A	0.00115481
RPA3	0.00115408
IFNB1	0.00115407
ADRA1D	0.00115378
MCM10	0.00115318
ASIC5	0.00115289
VWA8	0.00115275
BNC1	0.00115151
ICOSLG	0.00115145
EN2	0.00115098
IRGQ	0.0011498
WFDC11	0.0011493
MED16	0.00114761
CANT1	0.00114601
CNBD2	0.00114584
FABP2	0.00114568
NKAIN3	0.00114492
FDFT1	0.00114413
SMDT1	0.00114373
USP26	0.00114359
FGF21	0.0011428
GFRA4	0.00114268
KIR2DL3	0.00114265
ATXN1	0.00114259
GALNTL6	0.00114246
HDGFL1	0.00114081
ZNF311	0.00114043
LCN8	0.00114009
FAM43A	0.0011399
VWA1	0.00113871
LYPD4	0.00113845
ADAM3A	0.00113814
TIGD3	0.00113798
RYR3	0.00113697
CXCL9	0.0011362
LMX1A	0.00113475
SPACA3	0.0011341
DCT	0.00113405
ZNF474	0.00113376
PRRG3	0.00113337
PHEX	0.001133
HMHB1	0.00113256
HEATR9	0.00113221
RP9	0.00113184
LGALS12	0.00112998
C9orf57	0.00112993
C17orf78	0.00112871
SLC16A11	0.00112821
TMPRSS11D	0.00112706
RFESD	0.00112619
NRG2	0.00112389
AWAT1	0.00112375
SLC22A12	0.00112238
TNFRSF9	0.00112192
EML5	0.00112137
VGF	0.00111958
PI15	0.00111854
TEX12	0.00111751
DAZL	0.00111506
CER1	0.00111473
KHDC3L	0.00111439
HMGB4	0.00111428
SLC12A6	0.00111354
PATE2	0.001113
SLC27A6	0.00111121
POM121L2	0.00111023
RNF151	0.00110969
VSX1	0.00110757
TFDP3	0.00110754
ZSWIM2	0.00110713
ESPNL	0.00110668
OTOR	0.00110662
DSCC1	0.00110409
POLR2J2	0.00110379
ZFR2	0.00110267
COX8C	0.00110263
TPD52L1	0.00110205
CLEC12A	0.00110204
INSL6	0.00110154
LGALS14	0.00110045
ERAP2	0.00110003
SERTM1	0.0011
PRB1	0.00109849
RLN2	0.00109839
ZNF675	0.00109836
IL22RA2	0.00109672
SCN11A	0.00109592
ZNF432	0.0010957
FATE1	0.00109543
KRTAP7-1	0.00109542
MARCO	0.00109479
PCDHA9	0.00109474
LHX4	0.00109339
ERICH6	0.00109198
ATP9B	0.00109158
COL19A1	0.00109145
PCSK6	0.00109127
ZCCHC12	0.00109096
CPB1	0.00109086
ARHGAP42	0.00109015
SLFN13	0.00108967
RFX4	0.00108958
SLC12A5	0.00108899
PMCHL2	0.00108869
CELP	0.00108823
RBM3	0.00108775
KCNMB2	0.00108708
CNGA4	0.00108614
UTS2	0.00108596
OTOF	0.0010848
TRIB3	0.00108375
ZNF2	0.00108321
C12orf40	0.0010816
GPR6	0.00108121
GAL3ST2	0.00108101
BRDT	0.00108084
TRIM37	0.00108034
PGK2	0.00107949
ZNF385B	0.00107891
ACOT4	0.00107864
ATP6V1E2	0.00107855
ANGEL2	0.00107846
OXGR1	0.00107816
PAPPA2	0.00107695
CLEC4C	0.00107428
NLRP2B	0.0010742
PATE1	0.00107409
DMBX1	0.00107369
MYLIP	0.00107359
OR51E2	0.00107274
PHLDA1	0.00107188
CYP4A11	0.00107166
KCNG3	0.00107133
KIR2DL1	0.00107092
NPFFR2	0.00107053
LGALS8	0.00107029
PAXIP1	0.00106948
ZDHHC11	0.00106947
BFSP2	0.00106917
MRPS6	0.00106878
HTR1D	0.00106562
TAS2R14	0.00106539
NUP210L	0.00106493
WARS2	0.00106421
LCMT2	0.00106395
NEUROG1	0.00106334
MMP24	0.00106268
ACVR2B	0.00106223
MYO15A	0.00106211
TMEM196	0.00106149
SPATA16	0.00105951
SPATA1	0.00105946
CTHRC1	0.00105907
ERVV-1	0.00105877
ANKRD22	0.00105848
KRT33A	0.00105798
MALRD1	0.0010579
CLVS2	0.00105782
PRDM7	0.00105744
CYTL1	0.00105731
GALP	0.00105701
FRZB	0.00105659
FAM170B	0.0010564
ADH4	0.00105619
OR51B6	0.00105549
TMCO2	0.00105381
SDCBPP2	0.00105374
C6	0.00105095
PLXNC1	0.00105044
POMZP3	0.0010498
KIR3DL3	0.00104977
SRSF3	0.00104924
LDHAL6A	0.00104914
ANXA10	0.00104815
TEX33	0.00104784
TKTL2	0.00104756
IL10	0.00104753
CLRN1	0.00104711
NEFM	0.00104486
TERF2IP	0.00104466
AQP10	0.00104404
GCNT4	0.00104361
OR6A2	0.00104325
IRS4	0.00104263
CLIC6	0.00104194
BIK	0.00104138
PCDHGA10	0.00104131
GPR17	0.00104124
ZNF483	0.00104039
GUCY2F	0.00104002
GUCY1B2	0.00103976
GFRA2	0.00103924
OR1E1	0.00103774
ALLC	0.00103714
CBLN1	0.00103698
TDRD5	0.00103675
ERICH1	0.0010367
SMCO3	0.00103641
S100Z	0.00103532
SPATC1L	0.00103361
AQP1	0.00103357
TAS2R39	0.0010335
HTR3B	0.00103328
TLE6	0.00103202
CYLC1	0.00103164
FBXO43	0.00103039
YWHAEP7	0.00103033
C9orf131	0.00103025
PKNOX2	0.00103024
PARP1	0.00102984
GZMK	0.00102965
ELAC2	0.00102962
FLT3	0.00102949
FFAR1	0.00102938
RBM4	0.00102911
DNAH11	0.0010289
NAALADL1	0.00102836
A4GNT	0.00102793
MAP1LC3C	0.00102716
APOF	0.001027
PNMA2	0.00102696
LPAR4	0.00102661
TNNI3	0.00102658
NRTN	0.00102557
ASCC1	0.0010254
AIPL1	0.00102458
SFRP2	0.001024
UBE2DNL	0.00102373
SLC6A4	0.00102372
PRG4	0.00102337
ACTR3BP2	0.00102303
TMIGD2	0.00102219
ARL6IP4	0.00102187
GABRA4	0.00102063
GALR3	0.0010198
THAP3	0.00101823
RGMB	0.00101819
LYSMD2	0.00101807
SNX27	0.00101778
EPO	0.00101737
GUCY2D	0.00101689
IGFBP3	0.00101646
GDF2	0.00101617
MIOX	0.00101605
OR7A17	0.00101584
CCDC83	0.00101463
TAS2R10	0.00101385
TEX14	0.00101252
ADGRB2	0.00101202
TXNDC8	0.00101179
PMCH	0.00101175
SHCBP1L	0.00101151
SPATA22	0.00101107
CALCB	0.00101091
GGTLC2	0.00100955
TMEM145	0.00100942
SLIT1	0.00100935
LPA	0.00100833
OR7C1	0.00100823
FAM162B	0.00100724
AMELX	0.00100574
C16orf82	0.00100556
CLEC4F	0.00100511
ZC3H3	0.00100458
IGLV1-44	0.00100395
TAS2R19	0.00100352
DSCR8	0.00100336
IFITM10	0.00100091
MS4A3	0.00100052
NOTUM	0.00100023
TERB1	0.000999335
ADGRG2	0.000998046
PPBPP2	0.000997959
GK2	0.000997645
RSPO4	0.000997387
FGF20	0.000996826
CHI3L1	0.000996727
ULBP2	0.000996581
LRGUK	0.000996558
TAS2R40	0.000996033
CLYBL	0.00099578
CALML6	0.000995254
LTA	0.00099525
ZNF577	0.000994512
KLKB1	0.000993349
F2RL3	0.000991795
PLG	0.000991609
IL4	0.000991441
EDA	0.000990843
LCN1	0.000990799
EID3	0.000990204
RPL39L	0.000988661
CYSLTR2	0.000988614
OR10H2	0.000987675
IGFN1	0.000987376
OR3A2	0.000987249
DDIT3	0.000986657
TADA3	0.000986565
U2AF1	0.000986562
ARL2BP	0.000985833
COL2A1	0.000985167
KISS1	0.000984993
SLC13A4	0.000984617
TBC1D7	0.000983399
CRISPLD1	0.000983265
ASIP	0.000983164
ZP2	0.000982878
HYAL1	0.000981812
TBKBP1	0.000981628
SSX1	0.00098098
BEND2	0.000980406
SESN2	0.000980264
CSHL1	0.000979981
GZF1	0.000979673
JUND	0.000979371
TMEM37	0.000978973
OR51A1P	0.000978815
PRMT8	0.000978627
AKAP4	0.000977401
PCGF1	0.000977166
MRGPRX3	0.000976792
MBTPS1	0.000975949
WIF1	0.000975753
ACHE	0.000975461
SLC46A3	0.000974688
PCDHAC2	0.000974379
STK32A	0.000973859
ZNF274	0.000973716
TECTB	0.000972835
GRAPL	0.000972544
GTF2IP7	0.000972228
NCOA7	0.000971993
MLX	0.000971169
DEFB125	0.000971131
PROSER3	0.00097013
IGHD	0.000970115
PHYHD1	0.000969464
KRTAP9-9	0.000965863
BCKDHB	0.000965237
PHOSPHO1	0.000965094
PKP4	0.000964872
FGF19	0.000964771
CREB5	0.000964532
PRDM12	0.000964029
TAS2R8	0.00096352
IGKV1OR2-108	0.000963436
CGA	0.000963292
HMGB3	0.000962636
ZNF506	0.000962525
ZNF404	0.000962197
ZRSR2	0.000961926
C3orf36	0.000961762
RPL10L	0.000960588
GTPBP6	0.000960111
HSD17B7P2	0.000959679
GSX1	0.000959513
GLP1R	0.000959034
PRL	0.000957959
ZNF732	0.000957796
NRIP1	0.000957419
PDPR	0.000956761
AGK	0.000956218
ZNF75A	0.0009555
CRLF2	0.000955486
OR8B8	0.00095516
MMP27	0.000954749
RLN3	0.000953861
ARMC12	0.000953689
GHRHR	0.000953297
SLC2A6	0.000952102
FDPSP2	0.000951557
BTNL2	0.000951469
FDXR	0.000951422
COL10A1	0.000950306
CTNND2	0.000950106
PRSS33	0.000949933
EFCAB13	0.000949603
SREBF1	0.000949195
ANKRD19P	0.000949144
ZBTB32	0.00094894
RNF19A	0.000948105
HAGHL	0.000947513
KLK13	0.000947184
PHF14	0.000946769
TRAT1	0.000946229
RMI2	0.000945871
C11orf16	0.000945759
PNLIP	0.000944788
OR51B2	0.00094291
SHISA8	0.000942251
DMP1	0.000941925
UBBP2	0.00094176
CDK15	0.000941397
MBNL3	0.000941282
TMEM239	0.000941042
VLDLR	0.000940733
PAF1	0.000940072
HYLS1	0.000939361
BMP5	0.000938604
E2F8	0.000938208
COL11A1	0.000937703
FAM221B	0.000937436
MILR1	0.000936856
GNG13	0.000936579
FAM170A	0.000935698
GABPB1	0.000935411
SHISA2	0.000934985
SLC43A1	0.000934644
SPDYA	0.000934384
PM20D1	0.00093365
NPY2R	0.000933471
OR1F1	0.000933386
BEGAIN	0.000933007
PRSS16	0.000932698
MPP4	0.000932658
FGF16	0.000932178
MC1R	0.000930252
TBX20	0.000929353
MYO1A	0.00092914
KRT40	0.000927562
MACROD2	0.000927252
PSPH	0.000926321
OXCT2	0.000926289
NPLOC4	0.000925925
TPSD1	0.000925259
SMIM17	0.000925248
FBXL8	0.000924992
RHO	0.000924739
SYT16	0.000924206
GUCA2B	0.000923955
ZNF497	0.000923674
SLC9A2	0.000923371
ANP32C	0.000923104
GABRB2	0.000922915
LRRN4	0.000922376
IRF2BPL	0.00092219
KLF10	0.000921907
TSC22D3	0.000921768
CEP104	0.00092161
COL6A6	0.000919307
SPIN4	0.000919245
OR1F2P	0.000918742
GLYAT	0.000918605
CCDC42	0.000918275
PRDM14	0.000918085
SLC22A11	0.000916807
ZFP42	0.000916479
PKDREJ	0.000916087
FSCN2	0.000915669
L3MBTL4	0.000914673
SLC25A31	0.000914378
GAPDHS	0.000914321
GHRH	0.000914251
ZAR1	0.00091398
PRORY	0.0009135
DNAJB4	0.000912912
IFNA2	0.000912859
RHAG	0.000912586
AKNAD1	0.000911625
MED15P9	0.00091112
ZP1	0.000910803
FGF5	0.000910677
TERT	0.000910562
NUMBL	0.000910406
BAIAP2L2	0.000910117
MAJIN	0.00090909
SPATA3	0.000908993
ZNF418	0.000907843
HBE1	0.000906954
HMGN2P46	0.000906942
CCP110	0.000906221
LBP	0.000906024
CORIN	0.000905885
TMEM207	0.000905657
RSAD1	0.000905394
MAT1A	0.000903841
DAAM2	0.000903792
STUM	0.000903454
TMPRSS12	0.000903424
DCAF7	0.000902706
FUT11	0.000902569
ANP32D	0.00090228
GABRR1	0.000902254
CIR1	0.000902234
CALHM1	0.000901372
S100G	0.000901334
CSH1	0.000900918
DCSTAMP	0.000900826
C16orf54	0.000900818
RXFP1	0.000900589
RRN3P2	0.000900386
VGLL2	0.000899963
TTLL2	0.000899398
BTN1A1	0.000898637
ADAMTSL2	0.000898583
CHST7	0.000898196
RRM2B	0.000897741
EFNB3	0.000897177
ZNF133	0.000897028
NOX3	0.000895779
FRG1HP	0.000895508
ZNF440	0.000895233
IBA57	0.000894972
DLL4	0.000894412
USP29	0.000894247
RAB9BP1	0.000893831
CREB3L4	0.000893482
ACOT12	0.000892792
COLEC11	0.00089254
TMEM174	0.000892158
TCAM1P	0.000891842
WDR87	0.00089169
CHORDC1	0.000891502
RBM46	0.000891192
XKR4	0.000890969
LMNTD1	0.000890278
DMRTA1	0.00089016
HCN1	0.000889459
TBC1D28	0.000889398
REC114	0.000889265
KRTAP19-1	0.0008891
SEC1P	0.000888484
RFPL1	0.000887002
ST8SIA2	0.000886706
GH2	0.000886677
KRTAP1-3	0.000886677
SYCP3	0.000886571
GDF3	0.000886513
FOXE3	0.000885534
CATSPER3	0.000883479
PCSK2	0.000883211
MYL10	0.000883112
MOS	0.000883066
RIPPLY1	0.000883064
MSLN	0.000881651
TPBGL	0.000881029
C2orf27A	0.000879827
APOL2	0.000879556
ZNF80	0.000879519
CSN2	0.000878938
METTL21EP	0.000878686
IL21R	0.000878538
GAST	0.000877886
PITX2	0.000877732
PDE6G	0.000877418
DDX4	0.000876923
IFNL1	0.000876574
NLRP14	0.00087632
HACE1	0.000875901
SALL4	0.000875863
TMEM132D	0.000875842
FOXD4	0.000875821
GLYATL2	0.000875621
OR1G1	0.000875215
C20orf141	0.000875172
CHD3	0.000875083
SLC7A13	0.000875041
C12orf42	0.000874813
RPP25	0.000874756
IL17C	0.000874371
MANEAL	0.000873808
OR7E2P	0.000873799
ACOD1	0.000873494
PHOSPHO2	0.000873394
FRG2EP	0.000872923
UPK1A	0.000872449
SLAMF8	0.00087232
HSF2BP	0.000872118
GJC2	0.00087201
CCL7	0.000871989
GLS2	0.000871987
ZNF284	0.000871986
ARHGAP36	0.000871724
TTC12	0.000871629
DNAJB8	0.000869773
TRIM59	0.000869213
ARHGAP24	0.000868862
TMEM255A	0.000868534
CASP5	0.000868484
BTN2A2	0.000868144
PRSS37	0.000866264
KRTAP5-8	0.000866084
PCP4L1	0.000865272
C16orf95	0.000865002
OTP	0.000864823
NUTM2B	0.000864523
FABP5	0.000864487
REG1CP	0.000863895
PLAC1	0.000863282
NOS2	0.000863215
ERI2	0.000862576
ITGAD	0.000862426
TWF2	0.000861731
TTR	0.000861312
SCN10A	0.000860903
TAS2R41	0.000860064
HIPK1	0.000859876
NTNG2	0.000859532
NDST4	0.000858481
C20orf144	0.000857774
KIAA0319	0.000857337
CDKN1A	0.000857319
NOL4	0.000856823
FHIT	0.00085654
CCDC68	0.000856483
POU1F1	0.000856271
ALX4	0.000855823
CHPF	0.00085549
INGX	0.000855328
KRTAP17-1	0.000855326
HS2ST1	0.000855191
PSRC1	0.000854641
OR5E1P	0.000854261
MAGEC1	0.000854034
TDRD6	0.00085352
KIAA1210	0.000853465
ANKRD36BP2	0.000853045
VPREB3	0.000852884
IRGM	0.00085152
APLN	0.000850998
TRPM8	0.000850799
FBXL13	0.000850456
SMLR1	0.000850455
KLHL14	0.000850429
SERPINI1	0.000849812
GLIS1	0.000849305
ZFYVE28	0.000848984
PLCD3	0.000848319
TLX2	0.000848049
OR13C4	0.000847751
FOXD1	0.000847717
ADAMTSL1	0.00084685
AKR1C4	0.000845867
FRG1JP	0.000845719
RTP4	0.000845693
POU5F1P4	0.00084532
PTH2R	0.000844989
CSMD3	0.000844217
PCDH11X	0.000843025
NME8	0.000842783
MORC2	0.000842732
DDX53	0.000842291
PVALB	0.00084217
SP1	0.000842046
FGF18	0.000842038
XAGE3	0.000842015
CYP4F8	0.000841815
KCNJ1	0.0008418
OR51M1	0.000840757
OR12D3	0.000839569
SLC6A18	0.000838925
TAAR1	0.000838349
SLC44A5	0.000836903
ZNF219	0.000836835
MAEA	0.000836372
RAB11FIP3	0.000836354
AADACL2	0.000835686
FDCSP	0.000834317
PEX26	0.000834164
SLC7A3	0.000833978
KRTAP3-2	0.000833272
IL1RAPL1	0.000832734
RCAN1	0.000832487
IGFL2	0.000831957
ACKR4	0.000831689
SIGLECL1	0.000831081
RDH8	0.000830722
RD3	0.000829772
TDRD3	0.000829726
C10orf90	0.000829463
NPY6R	0.000829449
CCDC97	0.000829227
NOXRED1	0.000829184
OCM2	0.000828988
INSRR	0.000828677
BLK	0.000828644
SERPINE1	0.000827922
USP9Y	0.000827146
GHSR	0.000826585
DEFA4	0.000825791
TIGD6	0.000825541
DNAH8	0.000824893
PPDPF	0.000824278
ADGRG6	0.000824109
BARHL1	0.00082401
ZNF781	0.0008239
MAGEC3	0.000823206
IQCF3	0.000822957
LIF	0.000822171
RLN1	0.000821046
RBP3	0.000820871
STIM1	0.000820801
PANX3	0.000820798
SSX2B	0.000820431
GPR101	0.000820118
C22orf15	0.000820058
PDGFRB	0.000818154
ARL15	0.000817679
EPHB2	0.000816589
CFC1B	0.000816477
LALBA	0.000816228
MLXIPL	0.000815486
TULP2	0.000815433
MEP1B	0.000815169
SPATA18	0.000814937
MT1H	0.000814606
OR7A10	0.000814523
WDR25	0.000814492
B3GALT1	0.000813387
TRIM71	0.000812193
SH2D6	0.00081216
LOXHD1	0.000811552
KLRC3	0.000811371
OBSCN	0.000810643
FUT10	0.00081047
SYT6	0.000810073
ZSCAN4	0.000809796
DIRAS3	0.000808723
CRX	0.000807764
PRCD	0.000807349
OBP2B	0.000807329
FNDC11	0.000807078
STK16	0.00080682
FOXA3	0.000806547
ADGRA2	0.000805768
PRR30	0.000805564
STARD6	0.000805453
FGF23	0.000804777
CTLA4	0.000804637
ZSCAN1	0.000804562
PDC	0.000804457
ULBP3	0.000804393
BHLHE41	0.000804187
SPACA7	0.000804012
OR2H4P	0.000802428
CST9L	0.000801489
PKHD1	0.000801187
PDGFRA	0.000801009
SPSB2	0.000800726
SPIC	0.000800585
ADAM3B	0.000800577
CFAP74	0.000800404
TDRD12	0.000800167
PAX1	0.000799959
FAM166A	0.000798903
OR2J3	0.000798857
DPM3	0.000798841
SLC41A1	0.000798313
MMP11	0.000798106
SPC24	0.000797959
ZNF442	0.000797885
SLC12A1	0.000797623
CLK1	0.000797614
CRELD1	0.0007976
AREL1	0.000797526
ZNF184	0.000796956
C2orf50	0.000796713
BTBD18	0.000796631
IL2RA	0.000796213
ARHGAP22	0.000795965
ALX3	0.000795727
GMNC	0.00079546
BPIFB4	0.00079544
OR51B5	0.000795078
ADAMTS4	0.000794993
HCAR1	0.000794754
TGIF1	0.000794717
HBD	0.00079318
UBE2Q2L	0.000791757
OR2M4	0.000791476
CRYBB2	0.000791416
GCM2	0.000791239
SLC5A2	0.00079099
TRDN	0.000790899
SFTPB	0.000790868
TNFSF9	0.000790815
ZNF29P	0.000790709
TSPAN10	0.000790608
IGHV7-81	0.000790466
KRTAP4-1	0.00079042
EFCAB10	0.000790373
VSTM2A	0.000790266
GXYLT2	0.000789641
TRIM64EP	0.000789325
SLC12A4	0.00078912
CCT8L2	0.000788937
DNASE2B	0.00078823
CCDC169	0.000786128
SUMO4	0.000786109
KRTAP4-11	0.000786073
TBR1	0.000785315
SEMA4F	0.000784546
PASD1	0.000784234
FABP7	0.000783959
FAM20C	0.000783905
OR1I1	0.000783681
ENHO	0.000782791
JAKMIP2	0.000782627
CHRNB3	0.000781788
KCNAB3	0.000781559
PKD2L1	0.000780831
IFNA17	0.000780619
ASCC3	0.000779243
IL21	0.000778983
ZNF792	0.00077885
COL4A4	0.000778742
SIAH3	0.000778682
GDPGP1	0.000778611
SLC12A2	0.000778088
S100A8	0.000778029
ZNF114	0.000778011
CPNE7	0.000777662
CTCFL	0.000777625
MIER2	0.000777107
OLFM2	0.000777088
BCOR	0.000776459
IQCF2	0.000776118
PPP1R10	0.000775664
P2RX3	0.000775275
AP1AR	0.000773878
METRN	0.000773874
FBXO15	0.000773777
BOD1L2	0.00077334
MEPE	0.000773242
SHC1P1	0.000773198
COL21A1	0.000772455
TECRL	0.000771813
SDHA	0.000771501
OOSP2	0.000771384
ATP4B	0.000770853
RGS8	0.000770716
HEXIM1	0.000770031
ITLN1	0.000769837
GRIA1	0.000769743
PPP1R26	0.000768831
SLC25A35	0.000768441
PRODH2	0.000768314
MMP10	0.000767625
NTS	0.000767565
WDR72	0.000765554
LRTM1	0.00076418
BPIFA4P	0.000764113
ZFAND2A	0.000763842
SPP1	0.000763275
SLC1A7	0.000763226
SCGB1D1	0.000762796
H6PD	0.00076256
TRPM5	0.00076255
TGM6	0.000762527
SPIB	0.000762491
KLF14	0.000762257
GJD4	0.000761923
ZNF813	0.000761549
ENPP3	0.000761479
RPS4Y1	0.000761302
CCDC13	0.000760809
OR51B4	0.000759983
TPTE	0.000759736
KLF2	0.000759354
DONSON	0.000759343
TCEAL9	0.000758952
C3orf49	0.000758865
KLK14	0.000758543
VN1R1	0.000757661
PCK1	0.000757399
CBLB	0.000757355
CLEC1A	0.00075703
SLC52A3	0.000756825
TTLL10	0.00075644
DEFB124	0.000756389
WFDC10A	0.000756376
NGEF	0.000756101
MMP3	0.000755481
CA5A	0.000755027
OR10A3	0.000753906
MMP13	0.000753544
STAB2	0.000753391
RSU1P2	0.000752657
UPK2	0.000752252
ERV3-1	0.000751969
SLC11A2	0.000751675
CYP4F30P	0.000751568
THADA	0.000751465
MOSPD2	0.000751366
SGCG	0.000750503
AUTS2	0.000750142
DEXI	0.000749894
RNF182	0.000749751
MC2R	0.000749047
R3HDML	0.000748558
LGI3	0.000748004
PPP3R2	0.00074724
ANKRD52	0.000747176
MYH15	0.000746633
MED28	0.000745253
LIPI	0.000745153
DLL3	0.000745151
POU6F2	0.000744786
RXFP3	0.000744293
FKBP1B	0.00074422
PIGS	0.00074397
CEBPE	0.000743959
GCM1	0.00074383
TNFRSF10D	0.000743668
GOT1L1	0.00074356
CCDC182	0.000743166
TMEM114	0.00074264
CNTNAP4	0.000742585
EDARADD	0.000741834
CCDC38	0.000741464
NEB	0.00074051
METTL18	0.000740465
MAS1L	0.000739901
KLK4	0.000739536
MSL1	0.00073925
KRT25	0.000738571
AK9	0.000738537
APOA4	0.000737858
CRYBA4	0.000737856
AP4M1	0.000737695
ZNF782	0.000737401
RETN	0.000737101
DKKL1	0.000737021
CBY3	0.00073671
IFNA14	0.0007367
SLC25A26	0.000736416
ADCY10	0.000736189
CHRNE	0.000735941
CALB1	0.000735351
TMEM204	0.000735271
C20orf173	0.000735167
SPATA13	0.000735019
FAM216B	0.00073498
SH3GL1P2	0.000734949
TGM7	0.000734913
OR51I2	0.000734835
IL9	0.000734755
DEFB129	0.000734647
MBD3L1	0.000734275
HCG4	0.000733933
SEMG1	0.00073376
GLYR1	0.00073253
CALCOCO2	0.000732334
GDPD1	0.000732195
C9	0.000732164
TCEAL2	0.000731962
WNT16	0.000731748
UBE3D	0.000731425
CACNA1G	0.000731349
C7orf31	0.000731133
TBC1D10A	0.000730812
RASD2	0.000730636
DLK1	0.000730611
TP73-AS1	0.000729249
ACBD5	0.000728626
COX7B2	0.000728383
C7orf33	0.000728303
PLSCR2	0.000727287
CCK	0.000727031
FAM205BP	0.000726891
RPRML	0.000726734
NPBWR1	0.00072644
SESN3	0.000726203
ZNF276	0.000725872
ZNF627	0.000725125
TLR10	0.000724953
C17orf50	0.00072495
ROBO3	0.000724195
ADAD2	0.000724134
MGAT4EP	0.000723958
MAP3K7	0.000723842
GSTM5	0.000723587
NMBR	0.000723246
CXCL14	0.000722867
TAF1D	0.000722834
VWC2	0.000722757
LSG1	0.000722733
GRM6	0.000722578
OPALIN	0.00072238
CXCL11	0.000722266
LYPD8	0.000721178
SLCO1B1	0.000720834
ACTBP9	0.000720297
SIAH1	0.000720268
AHCYL1	0.000720232
SLC22A24	0.00072005
CNOT4	0.000719815
KL	0.000719078
CCL2	0.000718241
RNF144B	0.000718036
PPIEL	0.000717611
IQCF6	0.000716517
CSF3	0.000716191
PCDHB6	0.000716097
HRG	0.000715338
SSTR5	0.000715128
NUDT2	0.000714721
WFDC9	0.000714636
UGT2B17	0.000714249
CPEB1	0.000713414
KIN	0.000712909
HTR3C	0.000712726
UFSP1	0.000712281
LSM7	0.000712091
MRPL42	0.000712002
CHRNA2	0.000711952
OR1Q1	0.000711907
PLCZ1	0.000711732
RING1	0.00071173
KLK2	0.00071137
AKAP3	0.000711159
NRG3	0.0007111
SUZ12P1	0.000710979
RNASE7	0.000710615
CECR2	0.000709963
ADAM30	0.00070978
TPK1	0.000709608
HES7	0.000708673
DEFB1	0.000707711
OR12D2	0.000707404
C5orf34	0.000707248
C19orf81	0.000707129
TPT1P8	0.000706963
CYLC2	0.000706864
CD8A	0.000706784
ZNF461	0.000705723
BEST1	0.000705482
RPE65	0.000705032
ALPL	0.000704811
CCDC178	0.000704702
BRS3	0.0007044
SLC7A9	0.000704275
KRT81	0.000704158
CRYGC	0.000703977
CDC14C	0.000703809
CCDC87	0.000703187
TSPAN5	0.00070285
TEX15	0.000702484
TUBB	0.000702156
SLC16A4	0.00070195
OR8D2	0.000701813
C22orf31	0.000701527
APOA5	0.000701204
SERPINH1	0.000701186
TSPAN16	0.000701021
ADAMTS18	0.000700796
ERVFRD-1	0.00070061
CCDC33	0.000700496
POLR1A	0.000700081
TNR	0.000699336
LKAAEAR1	0.000698966
STH	0.00069853
KCNE2	0.000698342
CCL24	0.000698324
VILL	0.000697898
IL3	0.000697552
ERCC3	0.000697545
CA5B	0.000696979
FGF3	0.000696876
RPS2P45	0.00069677
ACTR3C	0.000696624
CCL22	0.000696454
GPIHBP1	0.000696118
SPATC1	0.000695737
HDAC10	0.000695735
CALCA	0.0006957
SLC22A14	0.000695527
KCNJ6	0.000695316
TSSK3	0.00069517
DNAJC22	0.000694907
RSBN1L	0.000694802
KMO	0.000694641
TRDV3	0.000694048
TMPRSS15	0.000693966
ZNF257	0.00069367
TCL1B	0.000693566
TDRD1	0.000693135
FKBP6	0.000693034
NANOS3	0.000692627
RAB40AL	0.000692561
HNF4G	0.000692548
ANXA2P1	0.000692474
ZNF541	0.000692333
CYP4F2	0.000691817
NETO1	0.000691699
LMO7DN	0.00069153
NEUROD6	0.00069149
NDC1	0.000691287
CHIT1	0.000691226
KCNG1	0.000690678
PCID2	0.000690511
CSN3	0.000690499
TPPP2	0.000690243
ENGASE	0.000689824
MPLKIP	0.000689682
PAX9	0.000689354
CCL18	0.000689315
NPBWR2	0.000689302
KRTAP11-1	0.000688876
ICAM1	0.000688847
IMPG2	0.000688626
FSCB	0.00068853
FEV	0.000688456
MMP26	0.000688405
LRRC10B	0.000688321
SCGB3A2	0.000688122
OBP2A	0.000687894
DPEP1	0.0006878
AGBL1	0.000686887
POLR2A	0.000686672
UMOD	0.000686187
CCL26	0.000685805
CHRNA3	0.000685687
HPSE2	0.000685658
ZBED4	0.00068549
STC1	0.000685423
SLC35E4	0.000685419
LEP	0.000685211
IL2	0.000685122
KRTAP10-11	0.000684869
ACSBG2	0.000684864
SPINT3	0.000684618
ACCS	0.000684384
KCNIP1	0.000683717
TMEM62	0.000683699
ZNF718	0.000682593
C2orf80	0.00068215
OR10C1	0.000681942
EVX1	0.000681728
GAA	0.000681674
CD276	0.00068119
HAPLN1	0.000680871
IRS2	0.000680841
C10orf53	0.000680651
CNTNAP5	0.000680576
STARD13	0.00067932
CDKN2C	0.000679313
TIMP3	0.000678869
KCNC4	0.000678808
RPRD1B	0.000678503
OR52D1	0.000678502
NHLH2	0.000678151
DCD	0.000677985
C1orf100	0.000677915
FIBCD1	0.000677159
UTS2R	0.000676412
ZNF300	0.000675699
ALPI	0.000675532
PRSS30P	0.000675423
ODF4	0.000674967
DMRTC2	0.000674552
UXS1	0.000674332
MFAP5	0.000674294
KRTAP4-5	0.000673252
SUN3	0.000673198
RAB5A	0.000672913
ZNF526	0.000672614
OR8G1	0.000672439
CCND1	0.000672059
CPXM1	0.000671959
MSX1	0.000671851
[truncated: 14,740 more rows]

## Sheet: Supplementary Table 5
Supplementary Table 5. Feature importance analysis for Chronic Obstructive Pulmonary Disease case-control classifier.
Gene	SHAP
EYA4	0.00685706
PTCHD4	0.00636166
RANBP17	0.00620876
EDA2R	0.00605967
C2	0.00425187
GTF2IRD2	0.00410249
LHFPL4	0.00404362
PCDHGB6	0.00384273
POU3F4	0.00359829
MRGPRX2	0.00330045
ZNF300P1	0.00324209
CSPG4P5	0.00297022
ABCB5	0.0028891
APLNR	0.00288219
SRY	0.00284358
ZNF518B	0.00284045
CDKN2A	0.00283809
PCDHB4	0.00281584
SYCE1	0.00268428
CLEC5A	0.00268427
TDRD9	0.00266022
XKR6	0.00266001
KIR2DL3	0.00255497
MORC1	0.00251381
PCDHB3	0.00250479
ZNF208	0.0024888
GPR52	0.00246017
MOV10L1	0.00244478
ASXL3	0.0024228
LMO3	0.00241823
PLAG1	0.00240851
KRTAP5-2	0.00232739
SLC6A15	0.00229914
SMCP	0.00229382
HTN3	0.00227432
SEMA3E	0.00226519
GPR21	0.00221066
NEUROG2	0.00220521
LRRN3	0.00217528
GREM2	0.00216086
GTF2H2B	0.00211466
CCDC144A	0.00211389
VENTX	0.00210094
TRIM22	0.00209228
C5orf47	0.00208271
RFPL3	0.0020759
PCDHB2	0.00205376
LRRC74A	0.00205112
ZNF556	0.00203266
ATF7IP2	0.00203091
ZNF215	0.00200354
GAPT	0.00199486
CECR7	0.00198367
ZMAT3	0.00197583
EYA2	0.00196627
NEFH	0.00196596
KDM5D	0.00196385
ECEL1	0.00195908
TAL2	0.00195737
ADRA2B	0.001951
EPHA6	0.00194824
TIPIN	0.00194582
CYP1A1	0.00194446
CDH10	0.00192208
KCNS1	0.00191746
ALX1	0.0019172
LDHC	0.00190983
DPYSL4	0.00189283
ACRV1	0.0018892
POMC	0.00188912
PLXDC1	0.00188774
MKRN3	0.00188133
ZNF549	0.0018798
INTS4P1	0.00187741
TRNT1	0.00186187
HSD11B1	0.0018552
IL25	0.001855
DNLZ	0.0018506
SNTG1	0.00184854
TSGA13	0.00184607
DDIT4L	0.00183804
ADORA3	0.0018373
TMEM217	0.00183273
COL23A1	0.00183146
ATP23	0.00182697
EPHA5	0.00181053
HTRA4	0.00180854
TRIM58	0.00179695
PCDH17	0.00179637
DUSP9	0.00179504
PCSK1	0.00178328
TMEM31	0.00177535
CCR4	0.00176095
ANGPTL4	0.0017589
NAP1L2	0.00175813
FXYD4	0.00175679
ARHGAP28	0.00174436
SIK1	0.00174254
NBPF3	0.00173903
FIGN	0.00172674
ART5	0.00172664
HSF5	0.00171157
GSTM1	0.001692
GP5	0.00169058
SAGE1	0.00167551
PYHIN1	0.00166123
FMO3	0.00165957
GUCA1A	0.00165414
ZNF77	0.00165065
GNRH2	0.00162599
IFNA5	0.00161138
HEATR9	0.00160084
CORT	0.0015946
HTR3A	0.00159169
SMIM17	0.0015908
COLQ	0.00158661
LHFPL5	0.00157688
SPINK2	0.0015618
KRBOX1	0.00155997
PEX6	0.00155961
FBXW4P1	0.00155946
EMC10	0.00155884
IL23R	0.00155784
OR2M4	0.00155751
PIEZO2	0.00154999
CNDP1	0.00154547
PRM2	0.00154215
CCDC182	0.001539
USP32P2	0.00153376
BCORP1	0.00152543
NPPC	0.00152358
GAS2L2	0.00152143
HBE1	0.00152114
SELE	0.00150899
NANOG	0.00150797
SCML2	0.00150674
DDX11L2	0.00149917
STK19	0.00149639
GSTT2	0.00149264
CCNYL2	0.00149038
SLC35G3	0.001488
ZNF93	0.00148271
ECHDC3	0.0014806
HBZ	0.00147864
CDX4	0.00147836
POTEKP	0.00147786
RHBDL3	0.00147052
NYAP2	0.0014673
E2F7	0.00146595
WNT8A	0.00146531
PRAME	0.00146458
OXT	0.00146049
KLRF1	0.00145636
HCG27	0.00145378
RORB	0.0014535
TGM4	0.00144527
TAF1B	0.00144196
MTO1	0.0014368
L3HYPDH	0.00143477
S100Z	0.0014283
SPG21	0.00142658
ANKRD55	0.0014195
ADAMTS19	0.0014173
CAPN6	0.0014151
JUND	0.00141231
GPR82	0.00140666
NDUFA4L2	0.00140361
L1TD1	0.00140294
KLRD1	0.00139826
CTAG2	0.0013972
HLA-DRB6	0.001396
ALLC	0.0013917
FAM118A	0.00138299
DACH2	0.00137804
KCNG4	0.00137768
SPRN	0.00137756
CEP192	0.00137099
PCDHA5	0.00136459
KRTAP7-1	0.00136381
LIPJ	0.00135879
ROBO2	0.00135868
FATE1	0.00135703
OPRD1	0.00135605
SLC14A1	0.00135104
SIGLEC11	0.00134924
IFNA1	0.00134624
BPIFB4	0.00134582
PIWIL2	0.0013398
GNG13	0.00133969
KRTAP4-4	0.00133867
PRSS54	0.00133865
KIAA0825	0.00133851
TERB1	0.00133661
FAM90A1	0.00133065
SCN10A	0.00133035
LCN15	0.00132937
MICB	0.00132884
ZFY	0.00132695
FAM9C	0.00132489
NAPRT	0.00132134
AGAP9	0.00132041
SRP9	0.00131978
LRRC52	0.00131929
HRH4	0.00131493
FBLL1	0.00131407
PWP2	0.00130884
PMCHL2	0.00130834
AOX2P	0.00129983
MRPS21	0.00129917
NPBWR2	0.00129896
GAGE1	0.00129779
FAM133A	0.00129587
PRORY	0.0012921
C20orf202	0.0012915
GDF15	0.0012907
VRTN	0.00128145
OR3A3	0.00127859
FOLH1B	0.00127717
OR6A2	0.00127705
PRSS21	0.00127505
FOXR1	0.00127237
DCAF4L2	0.0012694
ANKRD20A11P	0.00126477
CFHR3	0.00126457
ADAM12	0.00126408
SSX1	0.00126239
CCDC184	0.00126199
ANKRD36BP2	0.0012587
CLIC2	0.00125812
NYX	0.00125429
ACKR1	0.00125295
OXGR1	0.00125289
CYP2A7	0.00125224
SALL3	0.00125189
REM1	0.00125177
CRABP1	0.00124758
FDXR	0.00124201
NAA11	0.00124046
FGD2	0.00123814
TFG	0.00123591
ITGAD	0.00122955
IGF2BP1	0.00122834
MMP8	0.00122525
DAOA	0.00122506
C6orf15	0.00122412
CRYBA1	0.00122358
RPS16P5	0.00122246
KCNMB2	0.00122053
UPF3B	0.0012203
SIGLECL1	0.00121884
ISL1	0.00121757
SCN3A	0.00121656
FOS	0.00121626
OSTCP1	0.00121433
XRRA1	0.00121431
PCDHB8	0.00121314
PGBD4	0.00121166
IGSF22	0.00121163
IL5RA	0.00121135
CT55	0.00121121
ANP32C	0.00120814
SLC25A31	0.00120549
CRLF1	0.0012023
TGM6	0.00120116
LRRC37A2	0.00119506
SYCE1L	0.00119262
AIRE	0.00119207
NKAPL	0.0011914
PRDM15	0.00119007
TNFSF18	0.00118765
PCDH9	0.00118761
CLCA3P	0.00118755
RTP5	0.00118662
IL12RB2	0.00118548
C3orf36	0.00118402
CTSG	0.00118258
LENEP	0.00118209
C3orf14	0.00118204
DNASE1L3	0.00117898
BEND4	0.00117537
TMEM225	0.00117464
TMEM200C	0.00117171
ZNF391	0.00117136
CD6	0.00116986
TMEM26	0.00116946
MMP27	0.00116921
FIGLA	0.00116861
FBLN7	0.00116847
C17orf98	0.00116748
CYP46A1	0.00116584
BTN1A1	0.00116458
IGKV1OR2-108	0.00116358
GRK7	0.00115589
SP5	0.00115532
FAM221B	0.00115434
ZNF808	0.00115399
FAM106A	0.00115316
RNF17	0.00115243
KIR3DL3	0.00115243
NLRP11	0.00115123
IFI44L	0.00115023
UTS2B	0.00114931
FAM170B	0.00114914
TSGA10IP	0.0011483
TMCO2	0.00114655
PKD1L1	0.00113883
VWA1	0.00113827
PRB1	0.00113774
PSMG4	0.00113594
ACTL7B	0.00113546
CT62	0.00113508
UBBP1	0.00113366
EDDM3B	0.00113351
GUCA1B	0.00113159
MYH2	0.00113149
THNSL2	0.00113068
POU2F3	0.00112842
ACSM2A	0.00112765
IBSP	0.00112673
LGALS12	0.00112626
TAS2R38	0.00112588
FLYWCH1	0.00112442
DDX53	0.00112384
RHOXF1	0.00112281
MIXL1	0.00112153
PRDM7	0.00112059
PATE2	0.00111904
TRPM1	0.00111897
KLHL14	0.00111805
SCT	0.00111727
KLHDC7B	0.00111663
SNX31	0.00111563
C10orf62	0.00111548
PCDHA10	0.00111507
ATP9B	0.00111199
UNC5D	0.00111198
FOXD4	0.00110744
ANGEL2	0.00110709
PNMA2	0.00110447
TAS2R19	0.00110408
TRH	0.00110342
RLN3	0.00110304
FNDC7	0.00110181
GJA3	0.00110105
KHDC3L	0.00110104
SYT15	0.00109971
BIRC7	0.00109916
RAD21L1	0.00109829
ZNF705G	0.00109793
LTK	0.00109754
TMEM235	0.00109683
ADAM3A	0.00109613
CHRNA9	0.00109383
SMIM2	0.00109273
PRKAR1AP1	0.00109068
OR3A2	0.00109011
CCNA1	0.00108972
TAS2R50	0.00108791
ZNF432	0.00108761
ZFP57	0.00108672
CXCL13	0.00108597
F2RL3	0.00108396
GFRA4	0.00108344
CREB5	0.00108241
CCDC87	0.00108223
GUCY1B2	0.00108068
PPP3R2	0.00107987
OBP2A	0.00107739
CTAGE11P	0.00107262
SLC13A4	0.00107115
ZSCAN10	0.00106928
CES1P1	0.00106819
PRR30	0.00106741
VGF	0.00106712
REG4	0.00106676
HMX1	0.00106525
ZNF385B	0.00106406
CLEC4M	0.00106347
C6	0.00106327
ATG10	0.00106305
SLC22A12	0.00106135
EQTN	0.00106056
SCIN	0.00105922
HAGHL	0.00105411
IL21R	0.00105268
KCNH7	0.00105092
GJC2	0.0010506
TULP1	0.00105042
ANXA2P3	0.00104974
TPD52L1	0.00104952
MAGEC1	0.0010457
C2orf27A	0.00104523
DNAH11	0.00104443
CD1B	0.0010426
NOX5	0.00104209
ZNF683	0.00104207
NOG	0.00104187
FRG2EP	0.00104133
ZNF497	0.00104096
PSG3	0.00103869
LCN8	0.00103723
FABP2	0.0010336
NOXO1	0.00103296
HYAL1	0.00103233
CSF3	0.00103147
CCND2	0.00103016
BEX5	0.00102979
LCN10	0.00102941
NKAP	0.00102876
AMBN	0.00102749
PHYHD1	0.00102656
LDHAL6A	0.00102516
CCZ1	0.00102427
VMO1	0.00102427
KLHL21	0.00102329
IGFN1	0.00102197
RHAG	0.00102146
NRG2	0.0010193
CAPN12	0.00101761
ZNF415	0.00101749
ZNF442	0.00101459
DNASE2B	0.00101447
TMEM253	0.00101342
ZNF223	0.00101244
BEND2	0.00101036
MANEAL	0.00100845
PLA2G7	0.00100838
SYCP2L	0.00100775
SYT16	0.00100763
LHX4	0.00100724
PARP15	0.00100623
FRMD7	0.00100499
MBNL3	0.00100396
PAX1	0.00100302
TSACC	0.00100259
METTL21C	0.00100252
NLRP4	0.00100213
PCDHGB7	0.00100205
ZPLD1	0.00100149
FGF20	0.00100092
PCDHB9	0.000999543
PATE1	0.000999539
KCNV1	0.000998579
REN	0.000996844
ODF3	0.000995964
NOX3	0.000994934
PRKXP1	0.000993832
GABRA6	0.000993657
MYLK4	0.000993563
FGF23	0.000992429
COX8C	0.000991635
SMAD6	0.000991342
EFNA2	0.000991176
CNBD2	0.000990993
TDRD5	0.000988313
SEC1P	0.000987495
INSL6	0.000986174
MAGOH2P	0.000985887
UBE2NL	0.000985425
ADCY10P1	0.000984068
MESP2	0.000984037
GPX5	0.000980698
TAS2R9	0.000980387
SUGT1P3	0.000979366
TUBAL3	0.000978669
CEP104	0.000977953
SEMA5A	0.000977578
KCNJ1	0.000975992
RHO	0.000974228
LIPI	0.000973682
NPY2R	0.00097321
OR8B8	0.000972186
LOXL4	0.000971615
FMR1NB	0.00097017
SPDYA	0.000970001
OR7A5	0.000969862
MCM8	0.000969635
APOF	0.000968965
UTS2	0.000967681
PLA2G4C	0.000966387
LINC00674	0.000965746
SPAG6	0.000964869
ZNF266	0.000964786
GALR3	0.000963832
C17orf97	0.000961529
SYCP1	0.000961304
S100A7A	0.000960405
SPATC1L	0.000959897
DMRT1	0.000959326
NKX2-8	0.000959308
TPPP2	0.000958985
GLYAT	0.000958784
SSX3	0.000958703
RHD	0.000958026
GPR174	0.000957085
C3orf22	0.000957055
AHRR	0.00095603
THEMIS	0.000955323
IGHD	0.000954747
BRINP1	0.000954591
CNGB3	0.000953466
JADE2	0.000952095
TRBV16	0.000951291
FREM3	0.000950662
F7	0.000950193
KLRC3	0.000950118
BRDT	0.000950027
KLRG1	0.000948756
PURG	0.000947927
LRRD1	0.00094744
SCART1	0.000947348
PLG	0.000946361
FOSB	0.000945974
SAG	0.000945744
IFNA21	0.000945364
TAS2R13	0.000944358
PTPRD	0.000943593
DMP1	0.000943372
SLAMF9	0.000941403
KRT37	0.000939792
DEFB122	0.000939417
SMC4	0.000938948
FAM170A	0.000938422
ZFR2	0.000937941
VSIG1	0.000936692
ADAMTS20	0.000936635
MCM10	0.000936604
OR7A17	0.000935447
LEXM	0.000933656
GALNT13	0.000933551
CUX2	0.000932931
SIAH3	0.000932504
MAT1A	0.000931134
CSN2	0.000930562
ZNF682	0.00092862
EFCAB10	0.000926548
POU4F3	0.000926473
CDKN2C	0.000926166
KCNU1	0.00092371
OPN5	0.000922874
SLC22A1	0.000922023
GHRL	0.000921015
MFSD14C	0.000920474
CSN3	0.000919638
ARHGAP36	0.000919305
OR7E37P	0.000915112
SOX3	0.000914272
AREL1	0.000911756
CLDN23	0.000911557
RNF151	0.000910867
TXNDC8	0.000910713
RPL39L	0.000910698
CROCCP2	0.000910374
NPY6R	0.000910079
DNTT	0.000909325
NT5C1A	0.000908513
ADRA1D	0.000908232
GPAT2	0.000908125
COL20A1	0.000908104
UBE2U	0.000908063
ZPBP2	0.000907512
VGLL2	0.000906825
PTGER1	0.000906178
CDC14C	0.000905011
NLRP5	0.000902616
LRRC72	0.00090142
MAP1LC3C	0.000901044
SPATA31C2	0.000900841
PASD1	0.000899705
TPSD1	0.000899632
PCGF1	0.000898772
CBX8	0.000898368
ACYP1	0.000896576
SREBF1	0.000895604
KHDC1L	0.000895429
PGK2	0.000895406
LINGO3	0.000894781
ESPNL	0.00089452
ZNF252P	0.000893827
ERCC6L	0.000893429
PIANP	0.00089316
SMR3B	0.000892789
TEX28	0.000892358
FAM162B	0.000892053
DDB2	0.000891481
GREB1	0.00089086
PAGE1	0.000890686
MMEL1	0.000890163
ZNF595	0.000888157
OTUD7A	0.00088813
ANKRD33	0.000887721
OVOL3	0.000887646
CFAP57	0.000887426
CYTL1	0.000886691
TIGD3	0.00088655
GSX1	0.000885179
SPAM1	0.000884932
SIGLEC7	0.000884927
CLVS2	0.000883918
IFITM10	0.000883821
HSF2BP	0.000883308
TUBB7P	0.000882681
PCDHB16	0.000882451
OOEP	0.000882361
NAGS	0.000881015
FAM187B	0.000880987
EIF4A2	0.000880831
AQP1	0.000880313
SLC16A8	0.000879837
IFNW1	0.000879022
VWDE	0.000878983
IGHG1	0.000877871
SLC4A10	0.000877608
CCL26	0.000876681
LYG2	0.00087668
USP26	0.000876153
DIRAS3	0.000874781
DGKK	0.000874771
LBP	0.000873999
TEX33	0.000873574
PKNOX2	0.000872803
FAM43A	0.000872393
TFRC	0.000872288
CXCL10	0.000871663
CPNE7	0.000871051
TMEM196	0.000869836
SOX11	0.000869465
NMBR	0.000869124
EGR4	0.000868254
REC114	0.000866237
CDRT15	0.000865717
TADA3	0.000865009
TNFRSF9	0.000862107
ICOSLG	0.00086186
NUP210L	0.000860858
MCHR1	0.000860489
GPR62	0.000859567
PCDHGA10	0.000857851
KRT75	0.000857706
FRG1JP	0.000857283
AXDND1	0.000857236
CYP4F8	0.000856826
TCN1	0.000856755
GPR31	0.000856665
INGX	0.000854363
ZNF593	0.000852681
OR2A4	0.000852602
SMLR1	0.000852362
GPR55	0.00085208
MEPE	0.000851961
INSM1	0.000851779
SLC28A1	0.000851134
GPR75	0.000850284
APIP	0.000850121
CALCR	0.000850078
ACTG1P17	0.000849266
CSMD1	0.000849005
KRTDAP	0.000848165
TRHDE	0.00084618
ESR1	0.00084609
WFDC11	0.000845243
MCOLN3	0.000845179
ZNF675	0.000843965
IRGQ	0.000843962
HMGB3	0.000842557
SLC22A6	0.000841648
FBXL13	0.000841561
IFNA16	0.000841489
NPFFR2	0.000841191
GPR17	0.000840143
DCAKD	0.000839313
SATB2	0.000839097
FCRL4	0.000838874
GTF2IP7	0.000838725
GRK1	0.00083843
DNMT3L	0.00083829
STK32B	0.00083797
MGA	0.000837466
CACNG3	0.000836963
GXYLT2	0.000836395
EVA1A	0.000836279
PRR16	0.000836085
ERAP2	0.000835306
TAS1R2	0.000834799
DSPP	0.000833301
KCNE2	0.000833005
ACOT6	0.00083266
MILR1	0.000832564
OTP	0.000831866
TSPYL2	0.000830937
C22orf15	0.000830793
CDKN1A	0.000830584
FGF21	0.00082987
GRM5	0.000829551
SLC22A3	0.000829261
MC5R	0.000828818
PI16	0.000828308
RFPL1	0.000827817
CA5A	0.000825992
CRISPLD1	0.000825479
FAM205BP	0.000825309
HCRT	0.000825099
ZNF29P	0.000823894
KIAA0586	0.000823039
SYT3	0.000822587
TTR	0.000821559
RPGRIP1	0.000821197
SLC10A1	0.000819846
CCDC174	0.000819673
ENPP7	0.000815981
PRG4	0.000815971
MYO15A	0.000814402
BCKDHB	0.000814317
GRTP1	0.000813938
EEF2	0.000813733
CELA2B	0.00081307
OMD	0.000811867
PPEF2	0.000811837
GK2	0.000811042
SPATA45	0.000810717
NPIPB15	0.000810342
WDR72	0.000810234
BMP6	0.000810068
KISS1	0.000809556
MRPL23	0.00080946
RSAD2	0.000809306
CTNND2	0.000809266
IGFALS	0.000809171
SCGB3A2	0.000808995
PRRG3	0.000808809
BEGAIN	0.000808701
IGLL1	0.000807792
NPAS2	0.000807693
CGA	0.000806913
CCDC181	0.000805401
ZNF627	0.000805283
POLR2A	0.000804843
TPRXL	0.000804791
FCRL3	0.000804509
TMEM39B	0.000804347
LPA	0.000803324
SLC2A6	0.000803047
GABRB1	0.000803036
C1orf167	0.000802871
PRDM14	0.000802788
CEP128	0.000802763
NXF3	0.000802546
MPL	0.000801951
PROKR2	0.00080135
R3HDML	0.000801335
ZFP42	0.000800623
CST2	0.000799902
ZSCAN12P1	0.00079917
ZNF311	0.00079881
KRTAP5-8	0.000798687
SMIM3	0.000796832
RSAD1	0.000796277
RAG2	0.000793823
HRK	0.00079369
TRPM8	0.000793528
IGDCC3	0.000791962
THAP2	0.000791543
OR2B2	0.000790681
L3MBTL4	0.000790663
SHOX2	0.000789961
RNF148	0.000789497
TSPY1	0.000789182
MGAT4C	0.000788115
CATSPER3	0.00078767
GLB1L3	0.000787137
AQP10	0.000787096
GALP	0.000786894
COL21A1	0.000786821
CILP2	0.000786131
RRM2	0.000785582
KIRREL2	0.000784693
SMCO3	0.000784482
GUCY2D	0.000784213
MLXIPL	0.000783992
MALRD1	0.000783869
MRPL42	0.000783578
BTLA	0.000783126
ABCA11P	0.000783095
WFDC8	0.000782109
TMEM95	0.000781898
KCNK2	0.000780852
HACE1	0.000780835
PNMT	0.000780767
RETN	0.00077977
CD69	0.000779539
WIF1	0.000778084
DLX2	0.000777982
AGAP4	0.000777029
IL22	0.000776985
TAS2R8	0.000776925
TMPRSS11D	0.000776886
ENTPD2	0.000776336
ADM5	0.000775982
CLEC12A	0.000775561
ZC2HC1B	0.000775302
MIF	0.000775095
GHRHR	0.000773394
ARMC10	0.000773339
CTCFL	0.000772529
MARCO	0.000772515
CHORDC1	0.000772411
HCAR1	0.000772374
PRDM12	0.000770962
FUT11	0.000770621
TREML5P	0.000769942
IL21	0.000769919
NRK	0.000768059
ATP6AP1L	0.000767117
GUSBP1	0.00076678
SUMO4	0.000766655
GAPDHS	0.000766286
PSG7	0.000765845
POU5F2	0.000765762
IL10	0.000765286
SLC25A2	0.00076514
TBKBP1	0.000764916
CNPY1	0.000764849
GOLGA6L2	0.000764558
CNR1	0.000764361
KRT84	0.000763672
TECRL	0.000763667
C17orf78	0.000762973
YWHAEP7	0.000762402
LCT	0.000762347
TNFRSF17	0.000761261
ZNF506	0.000760437
PKDREJ	0.000759713
ZNF180	0.000758931
WDPCP	0.000758391
ASIP	0.000757941
VPS16	0.000757689
SAXO1	0.000757151
MMP1	0.000755917
ZCCHC13	0.000755751
OCM2	0.000755466
PSMA8	0.000754256
POU4F2	0.000754046
SPIB	0.000753933
C7orf33	0.000753495
PAOX	0.000753142
GALNTL6	0.000752223
ATP6V1C1	0.000752163
SHOX	0.000752011
AWAT1	0.000751504
LIN28A	0.000751491
GPR50	0.000750678
GPAT4	0.000750549
FRG1HP	0.000750176
OR2S2	0.000750007
LTA	0.000749943
LHX5	0.000749788
FSCN3	0.000749542
CRYGN	0.000748385
ACKR4	0.000748318
ZNF813	0.000747722
CHD3	0.000746717
MCF2	0.000746682
PLK5	0.000746514
SLC22A13	0.000745918
PCDHA2	0.000745857
FUT5	0.000745377
TSPAN16	0.000745329
ACVR2B	0.000745013
GPRC5D	0.000744707
UXS1	0.000744495
MPP4	0.000744424
NOL4	0.000744028
AIPL1	0.000743986
CYP3A7-CYP3A51P	0.000743145
HSD17B14	0.000741213
DAAM2	0.000740657
SPRR4	0.000740139
ZSCAN22	0.000739633
SLC45A2	0.000739083
GBX2	0.000739012
PLA2G2D	0.000738038
GPHA2	0.000737919
IGLV1-44	0.000737797
STIP1	0.0007373
ZNF732	0.00073729
CYP7A1	0.000736824
RYR3	0.000735044
ALX3	0.00073502
BTF3P12	0.000734325
WDR64	0.000734014
ARL6IP4	0.000733468
MLN	0.000733315
TIMP3	0.000733012
CYP11B1	0.000732527
CCL1	0.000732475
TEKT5	0.000732279
ACTBP9	0.000730598
AATF	0.000730332
SND1	0.000729953
FAM169B	0.000729524
ZNF781	0.000728644
ZNF284	0.000728622
PMS2P5	0.000725073
CBLN3	0.000724801
IFNA4	0.000724622
GPR6	0.000723637
SLC12A1	0.000723118
CIB3	0.000722975
TIGD4	0.000722199
NOTUM	0.000722126
SLC22A31	0.000722091
COL6A6	0.000722066
WDR97	0.000721515
ALX4	0.000720396
NUP85	0.000719595
CIB4	0.000719474
PI15	0.000718995
ADAM7	0.000718986
SALL4	0.000718383
SYCE3	0.000717891
TAS2R10	0.000717675
COL2A1	0.000717444
APOL5	0.000716843
USH2A	0.000716825
FOXB1	0.000716302
FGF16	0.000715805
UBC	0.000715162
ZNF114	0.000715095
GABRA4	0.000714892
ZSWIM2	0.000714835
CCR8	0.000714629
SOX14	0.000714305
GH1	0.000714246
SPATA8	0.00071379
VPREB3	0.000713558
PLD6	0.000713523
NPHS2	0.000713428
TEX14	0.000712882
NANOS3	0.000712496
BORCS8	0.000712441
FHIT	0.000712367
IL17F	0.000711798
GTF2IRD2B	0.000711092
TSPAN10	0.000710355
OR2C1	0.000709996
IRGC	0.000708503
GSC2	0.00070842
MS4A3	0.000708407
GLRA1	0.000708164
LALBA	0.000708159
CRYBB3	0.000706881
ACE2	0.000706759
OR2H1	0.000706726
SPATA32	0.000706103
ZDHHC11	0.000705941
MMP10	0.000705931
U2AF1	0.00070451
HBD	0.000704456
C21orf62	0.000704277
TRIM40	0.000704161
NR2E1	0.000703805
PCDH11X	0.000703686
FAM47A	0.000703375
ELSPBP1	0.000703281
LRGUK	0.00070305
ZAN	0.000703038
APLN	0.000702471
ZCCHC12	0.000702459
IZUMO2	0.000702117
PCDHAC2	0.000702059
CDC42EP4	0.000701798
PREX2	0.000700953
BTBD18	0.000700858
ATP6V1E2	0.000700463
DMRTA1	0.000700293
SLC7A3	0.000700138
TFAP2E	0.000700118
GCNT4	0.00069957
GUCY1A2	0.000699206
AKR1C4	0.000698932
SERTM1	0.000698757
IMMP1L	0.00069869
MT1H	0.000698313
TPK1	0.000698266
ARHGAP26	0.000698115
RPS4Y1	0.000698103
SLC22A2	0.000697981
CCL22	0.000697432
CLCN1	0.000697244
SCN4B	0.00069712
IRGM	0.000697002
ZNRF4	0.000695911
FAM20C	0.000695312
BAIAP2L2	0.000695262
ARHGAP22	0.000695144
NTNG2	0.00069468
NCR2	0.000694623
EPHX4	0.000694145
SPACA7	0.000693606
IQCF1	0.000693575
SLIT1	0.000693204
IFNL1	0.000692905
SPATS2	0.000692866
NLRP9	0.000692843
BTF3P13	0.000692627
GDPD1	0.000692585
CCZ1B	0.000692527
MEIG1	0.000691966
GLI4	0.000691597
HSPB9	0.000690485
TSHZ2	0.000690329
CPNE1	0.000690049
DDX4	0.000689938
ZSCAN1	0.000689616
NLRP3	0.000689398
PSRC1	0.000689265
NEB	0.000689086
COL10A1	0.000688831
ROBO3	0.000688425
HYDIN2	0.000687955
SULF2	0.000687279
DBIL5P2	0.000687138
TEX12	0.000687059
OR1J4	0.000686834
PDE6B	0.000686821
ATP6V0B	0.000686477
IL2RA	0.000686213
ACOD1	0.000686154
TRAV8-3	0.000685344
IGFBP1	0.000684859
ULBP3	0.000684811
ZNF835	0.000682988
TPBGL	0.000682335
FBXL8	0.000681929
LY6K	0.000681834
MAGEA12	0.000681526
HTR2B	0.000681419
TULP2	0.000681093
FFAR1	0.000681061
SMDT1	0.000680907
PRR32	0.000680491
MIPEPP3	0.000680419
SKAP2	0.000680395
RGMB	0.000679819
GNGT1	0.000679609
FDPSP2	0.000679531
HMGN2P46	0.000678456
FGF3	0.00067784
CPA6	0.000677589
PROSER3	0.000676505
WDR38	0.000676106
ULBP2	0.000675554
ACTR3C	0.000675386
MGAT4EP	0.000674889
RGS8	0.00067466
PDE4A	0.000674012
C7orf31	0.000673198
TM4SF1	0.000672687
TENM1	0.000672385
NBEAP1	0.000671935
KIR2DL1	0.000671594
KRTAP4-1	0.000671353
POM121L10P	0.000670896
TP53I11	0.000670859
OR1F1	0.000670613
HBB	0.000669126
OR6B1	0.000669001
SPATA13	0.000668599
SPATA3	0.000668292
CHRNE	0.000668263
ACBD5	0.000667431
IMPG2	0.000667266
RFX4	0.000667247
OR5J2	0.000666459
OR51B4	0.000664445
OR1E1	0.000663969
NBPF4	0.000663873
SLC5A11	0.000663811
PSPC1	0.000663786
METTL21EP	0.000663712
NACA2	0.000663307
ASIC5	0.000663224
SNX27	0.000663205
IFNK	0.000663008
LRRC74B	0.000662969
MAGEA6	0.000662678
ACHE	0.000661424
GZMK	0.000661275
MUC7	0.000660865
PRSS16	0.000660571
RRH	0.000660485
GFRA3	0.000660463
SEMA4F	0.000659934
TMEM37	0.000659265
SCN11A	0.000658995
GCNT1P1	0.000658874
RBM3	0.000658668
CHRNB3	0.000658525
CXCL14	0.00065844
SLC30A8	0.000658071
ESM1	0.000657731
POMZP3	0.000657065
UBBP2	0.000657047
GRIN2A	0.000657013
OR7E2P	0.000656963
PLIN1	0.000656642
PLSCR2	0.000656443
KRTAP5-9	0.000656026
C12orf40	0.000655421
GPR27	0.000654367
NEFL	0.000653925
SVOPL	0.000653669
FCGR3B	0.000653431
SGCG	0.0006532
STIM1	0.000652672
DAZL	0.000652227
SLC12A5	0.000652033
FRG1EP	0.000651781
GPR45	0.0006515
TLX2	0.00065105
NDST4	0.000650755
CASP5	0.000650538
OR51I1	0.000649875
DPM3	0.000649372
SLC16A4	0.000648709
ST20	0.000648566
ADAD2	0.000647964
CALB1	0.000647698
VCX2	0.000647363
IBA57	0.000646956
FGF8	0.000646691
TSPO2	0.000646491
SLCO1B1	0.000646394
RP9	0.00064638
OR51E2	0.000646377
DEFB118	0.000646287
F8	0.000646117
KLHL25	0.000646092
HOXB1	0.000645952
ADAMTSL2	0.000645291
ZNF629	0.000644898
HES4	0.000644484
CLDN14	0.00064444
RNF212B	0.000644254
PHEX	0.000643915
CALML6	0.000643501
SLC25A35	0.000643194
MFAP5	0.000642978
AADACL2	0.000642637
HLA-G	0.000642289
XCL1	0.000642078
PRPS1L1	0.000641834
ZNF184	0.00064075
GTSF1L	0.000640425
ABCC12	0.000640239
OR1F2P	0.000640137
ZNF541	0.000640096
OR11A1	0.000640078
SLC6A3	0.000639458
DNAJB8	0.000639326
CCDC54	0.000639142
ZIC2	0.000638948
CALCA	0.000638399
VN1R108P	0.000638354
PAPPA2	0.000637804
SESN2	0.000637706
COLEC11	0.000637634
C2CD4B	0.000637559
SSTR4	0.000637463
SIX3	0.000637425
HPSE2	0.000637309
PSKH2	0.000637153
TACR3	0.000637012
PCDHB14	0.000636794
KLKB1	0.00063656
IL4	0.000635694
HDAC10	0.000635586
ZRSR2	0.000635558
OR10A5	0.000635364
AKAP3	0.000635122
PRSS33	0.00063442
PIWIL1	0.000634185
ADAM18	0.000634028
COL6A5	0.000633774
GNB1L	0.000633731
TRIM59	0.000633673
SPP1	0.000633504
NRIP1	0.000633478
IGFL2	0.000632955
CCT8	0.000632449
KRT32	0.000632295
ZNF229	0.000632274
DLEU7	0.000631553
TAAR2	0.000631437
SP1	0.000631357
THADA	0.000631186
SHISA3	0.000630976
C19orf81	0.000630834
DSCR4	0.000629816
KIF15	0.000629473
EID3	0.000629432
KCNJ6	0.000628833
OTOR	0.00062849
IL9	0.000628303
ESRRB	0.000628148
FIBCD1	0.000627742
GABRB2	0.000627276
PAGE5	0.000627253
GCM2	0.000627025
OR8D1	0.000626217
IL1RAPL1	0.000625767
WFDC10A	0.000625133
TM2D1	0.000625038
FEZF2	0.000624793
CRYBB2	0.000624507
TEX15	0.000624488
OSM	0.000624152
BLID	0.000623902
C9orf131	0.000623882
ZNF575	0.000623708
SLC22A11	0.000623665
OPCML	0.000623402
RGSL1	0.000622153
ANKUB1	0.000620974
ZP2	0.000620819
TRDV3	0.000620775
ZNF440	0.000620655
ERVFRD-1	0.000620492
SPIN4	0.000620314
EPO	0.000620091
ADH4	0.000619797
NANOS2	0.000619742
ARL15	0.00061925
TRAV12-2	0.000619186
ANP32D	0.000619076
CA5B	0.000619023
PRL	0.000618937
RBM45	0.000618714
IL22RA2	0.000618538
FAM166A	0.000618522
AANAT	0.000618503
CHRNA3	0.000618021
KRTAP19-1	0.000617878
CIR1	0.00061784
ASCC1	0.000617603
DPY19L1P1	0.000616997
RPS2P45	0.000616895
RBPJL	0.000616191
CPXM1	0.000615881
PLAC1	0.000615412
FOXE3	0.000615372
SPATA12	0.00061517
LYZL6	0.000614979
SYCP3	0.000614664
PCDHGB8P	0.000613897
BANF2	0.000613886
CLEC4F	0.000613123
TSSK1B	0.000612573
OR1D5	0.000612418
SLC52A3	0.000611865
UBE2DNL	0.000611434
ZAR1	0.000610915
AEN	0.000610245
NRTN	0.000609771
RDH8	0.000609443
RBM11	0.000609348
SLC6A5	0.000609196
WARS2	0.000609189
MPLKIP	0.00060905
FBP2	0.000608732
BARX1	0.0006085
HPX	0.000608336
TREH	0.000608313
ADAMTS4	0.000608296
RSBN1L	0.000607605
FANCD2OS	0.000607463
LMNTD1	0.000606881
MATN4	0.000606111
MYLIP	0.000605941
A4GNT	0.000605416
ACOT4	0.000605145
PPIL3	0.000605056
AHSG	0.000604292
ANKRD22	0.000603752
NEUROD6	0.000603468
CSMD3	0.000603175
HUS1B	0.000603118
PKHD1	0.000602979
AGBL1	0.00060263
ZNF718	0.000602219
OR1D2	0.000602002
GALR2	0.00060183
TRIM71	0.000601783
KRTAP11-1	0.000601577
KCNH1	0.000601201
IRS4	0.000600586
RLBP1	0.00059982
ARHGAP42	0.000599757
DPPA2	0.000599651
HCG22	0.00059959
SPESP1	0.000599522
ETFBKMT	0.000599163
CALR3	0.000599017
ZP1	0.000598617
ACOT12	0.00059848
GDPGP1	0.000598091
CD248	0.000598048
SPATA19	0.000597106
GPIHBP1	0.000597018
KCNK16	0.000596723
OR10D1P	0.000596408
SLC43A1	0.0005964
IRS2	0.000596392
TMPRSS12	0.000596345
ZNF483	0.000596168
PLPPR4	0.000595907
LPAR4	0.000595684
NLRP2B	0.000595655
BHLHE23	0.000595619
GGTLC2	0.000595479
BLK	0.00059522
SMIM21	0.000594937
MUC3A	0.000594653
FBXO15	0.000593978
EXO5	0.000593695
TYRO3P	0.000593557
ZNF418	0.000593315
APOL2	0.000593217
BARHL1	0.000593105
PSG11	0.00059294
TTC9B	0.000592289
UBL4B	0.000592177
SLC25A41	0.000592097
ZNF257	0.000591821
CYP2C19	0.00059135
CTHRC1	0.000591282
CD4	0.000591259
RING1	0.00059111
MROH2A	0.000590924
SOCS1	0.00059051
SLC22A8	0.000590375
RP1L1	0.000590182
SPIN2A	0.000589798
POU6F2	0.000589762
ANKRD26P3	0.000589216
GPR15	0.000588973
PRMT8	0.000588777
HS2ST1	0.00058875
PCK1	0.00058868
OLFM2	0.000588327
IFNA2	0.000588129
SLC17A7	0.000587931
LUZP4	0.00058757
GUCY2C	0.00058642
DLGAP1	0.000586173
SLC17A8	0.000585782
BPIFA4P	0.000585642
SLC38A11	0.000585376
AP1AR	0.000585345
SEMG2	0.00058514
GALR1	0.000585117
PHOSPHO1	0.000584906
PRG3	0.000584826
TUBB1	0.000584373
PDE6G	0.00058416
LHCGR	0.000584095
KCNK4	0.000583739
MRLN	0.000583123
OPALIN	0.000582839
CER1	0.000582687
C11orf94	0.000582665
KLK13	0.000582036
EN2	0.00058171
TCEAL8	0.000581594
TMEM52	0.000581218
KIN	0.000581069
COG4	0.000580452
HCRTR2	0.000580315
IQCF2	0.000579956
IL3	0.000579361
NEFM	0.000578561
INSM2	0.000578537
GBAP1	0.000578495
OR5AK4P	0.000578293
FBF1	0.000578215
TSPEAR	0.000578173
TBC1D24	0.000577882
COL5A3	0.000576768
RDM1	0.000576721
RABGGTB	0.000576416
TOX2	0.000575935
LCNL1	0.000575443
LRFN3	0.000575333
KCNA10	0.000575108
TERB2	0.000574463
LMX1A	0.000574358
LGSN	0.00057405
TP53INP2	0.000573579
FAM217A	0.000573458
UFSP1	0.000573439
SSTR1	0.000573376
S100G	0.000573104
OTX1	0.000572858
HLA-DPA2	0.000572589
CCL18	0.000572432
MRGPRX3	0.000571987
OTOF	0.000571554
SIM2	0.000571446
ZNF577	0.000570971
OR9A1P	0.000570625
INSL4	0.000570439
PCSK2	0.000569764
GHRH	0.00056963
PRR34	0.000569265
CCDC140	0.000569129
DDIT3	0.000569092
C5orf58	0.000568936
ERN2	0.000568775
RIPPLY1	0.000568633
SLC1A7	0.000568391
SPATA16	0.000568326
MEGF10	0.00056746
BSND	0.000567292
NPLOC4	0.000567138
SPACA3	0.000566346
LINGO2	0.000566115
OR3A1	0.000565775
RBM4	0.000565648
TEX43	0.000565391
PRM1	0.000565194
TCEAL9	0.000565144
CADM3	0.000565084
TRIB3	0.000564925
PPY2P	0.000564718
LBX1	0.000564473
MMP16	0.000563823
RERGL	0.000563248
PHOSPHO2	0.000563236
COL19A1	0.000562901
GLP1R	0.000561922
GOLGA6A	0.000561662
RIPPLY3	0.000561559
NME8	0.000561231
TFCP2L1	0.00056034
MAGEC3	0.00056027
TPTE	0.000559985
RNF144B	0.000559976
IL2RB	0.000559502
GCNT7	0.000559375
SOHLH2	0.000559158
LECT2	0.000559106
IL5	0.000559044
IRF2BPL	0.000558821
CYS1	0.000558162
C6orf58	0.000557985
ACADL	0.000557745
CHST7	0.000557739
POLR2J2	0.000557672
ACSBG2	0.000557145
FABP5	0.000557036
MED28	0.000557032
DLL4	0.000556973
SHISA6	0.000556934
BRS3	0.000556364
VN1R1	0.000556333
GSTM5	0.000556293
TBR1	0.000556276
LRRC3	0.000555395
CHPF	0.000554828
XKR4	0.000554745
PTTG3P	0.000554743
VSTM2A	0.000554468
GTF2B	0.000554243
ZNF563	0.000554103
NPTX2	0.000554047
TMPRSS11B	0.000553657
OR52D1	0.000553566
TECTB	0.000553218
ZMAT4	0.000553012
SHISA2	0.000552922
PRLH	0.000552858
MAJIN	0.000552553
CPB1	0.000552535
RTP1	0.000552248
CELP	0.000552038
THAP3	0.000552017
DCT	0.000551908
CPN1	0.000551853
CBLN1	0.000551813
ADGRG2	0.000551617
OR10H1	0.000551492
HRG	0.000551464
CAMP	0.000551061
TBX22	0.000550985
PSG2	0.000550234
SH2D4B	0.000550068
SLC7A9	0.000549972
GALNT15	0.000549879
HCRTR1	0.000549737
GPR153	0.000549476
FAM47E	0.00054927
KLK15	0.000549104
ARHGAP24	0.000548927
EVX1	0.000548305
GPR101	0.000548074
SLC12A2	0.000548048
CYSLTR2	0.000547206
WBP1L	0.00054623
SPATA1	0.000546135
TNMD	0.000546005
PSG6	0.000545608
OR13C4	0.000545218
SLC17A1	0.000545108
SOCS2	0.00054509
SEC14L3	0.000544949
SHCBP1L	0.000544359
ZIK1	0.000544288
ZBED6	0.000544156
CNOT4	0.000543626
LGALS8	0.000542963
VSX1	0.000542729
REXO1L1P	0.000542593
PALD1	0.000542282
CCDC33	0.000541859
GOLGA2P10	0.000541858
TVP23C	0.000541679
C4orf45	0.000541538
ZNF23	0.00054149
RPRML	0.000541203
GJD4	0.000541068
CLDN20	0.000541063
RSPO4	0.000541038
KCNJ9	0.000540579
STAB2	0.00054031
CETP	0.000540231
NEUROD4	0.000539749
PPEF1	0.000539631
PNLIP	0.000539418
RMI2	0.000539288
OPRPN	0.000537895
GIP	0.000537551
ADGRB2	0.000537486
LGI3	0.000537423
GAA	0.000537136
BATF	0.00053709
PTH1R	0.00053707
ZNF626	0.000536891
SPACA1	0.000536784
HTR2C	0.000536693
DAPK2	0.000536622
OIT3	0.000536507
INSL3	0.000536171
SPATC1	0.000536165
FAM205C	0.000536044
CBY3	0.000536044
GTPBP6	0.000535651
CCDC83	0.000535211
NR4A2	0.000535149
TYMS	0.000534836
CHIT1	0.000534789
PCDHB6	0.000534783
CLYBL	0.000534534
POC1B	0.000534462
LY6H	0.000534303
NRIP2	0.000534155
CANT1	0.000534025
PMS2P2	0.000533616
OTUD5	0.00053353
TAS2R16	0.000532439
GRAPL	0.000532305
SYT6	0.000531938
ERICH1	0.000531849
DEPDC4	0.0005317
MMP13	0.000531312
ZNF436	0.000531039
CFAP74	0.000529822
HTR3B	0.00052956
MSLN	0.000529414
TDRD1	0.000529016
CALHM3	0.000528976
LMO7DN	0.000528377
TBL1Y	0.000528342
TSC22D2	0.000527961
TMEM62	0.00052762
CXCR3	0.000527608
FUT10	0.000526659
DLL3	0.000526522
HSD17B12	0.000526443
RSPH6A	0.000526331
PCNX1	0.000526282
ZKSCAN3	0.000525812
RIMBP2	0.000525203
CASR	0.000524946
CMA1	0.000524401
RTP3	0.000524183
GPR84	0.000524104
UBE2Q2L	0.000524015
MIPOL1	0.000523907
S100A8	0.000523648
KLHL3	0.000523277
SERPINA9	0.000522974
KLK4	0.000522936
SSX2B	0.000522871
UCN	0.000522366
GABRR3	0.000522315
NEUROG1	0.000522115
C22orf31	0.000521215
FTH1P5	0.000520845
CCL20	0.000520479
FKBP1B	0.000520335
ABCC8	0.000520318
C9orf57	0.00052008
OR2F2	0.000519837
CABLES2	0.000518681
METRN	0.000518642
DMBX1	0.00051857
NELL1	0.000518474
CNTNAP5	0.000517985
KCNG1	0.000517704
BHLHE41	0.000517662
AKAP10	0.000516862
LIF	0.000516588
CNGA3	0.000516329
HERC2P7	0.0005163
MYH4	0.000516299
COX4I2	0.000515889
ELK2AP	0.000515763
DEFB124	0.000515605
BNC1	0.000515143
CIART	0.000514878
FERD3L	0.00051474
CLNK	0.00051467
CALHM1	0.000514405
OR5H1	0.000514295
UBE2H	0.000514289
BOD1L2	0.000514225
FAM163B	0.000514133
MGAM2	0.000514082
OR2J3	0.00051364
MBD3L1	0.000513317
OR51B6	0.000513308
NGEF	0.000512958
CRLF2	0.000512925
PEX26	0.000512902
HCN1	0.000512714
NCOA7	0.000512356
C11orf87	0.000512191
TRIM47	0.000512152
IFNA7	0.000511909
ZNF75D	0.000511735
MYH15	0.000511523
PRCC	0.00051132
INAFM1	0.000510989
NPFF	0.000510428
POU4F1	0.000509728
AGO1	0.000509441
SLC17A6	0.000509372
SLC35E4	0.000509331
HSD17B7P2	0.000509298
CCDC13	0.000508527
ZC3H3	0.000508472
ARL2BP	0.000508238
IGDCC4	0.000507855
FSHB	0.000507843
RANGRF	0.000507428
OR1I1	0.00050714
SUMO3	0.000507091
MTNR1B	0.000506983
C16orf95	0.000506543
SDCBPP2	0.000506451
KCNG3	0.000506109
SIRPD	0.000505567
TEKT2	0.000505218
EFCAB13	0.000504857
MED15P9	0.000504834
CHRNA6	0.000504633
RLN1	0.000504007
ASCC3	0.000503949
ZNF696	0.000503768
HES7	0.000503757
ZG16B	0.000503574
PPY	0.000503478
OR2L13	0.000503435
A2MP1	0.000503312
PLCD3	0.000503102
C2orf50	0.000503087
TIGD6	0.000502955
TAS2R41	0.000502758
SPSB2	0.000502708
PRSS30P	0.000502484
SLC12A6	0.000502309
TMEM145	0.00050212
P2RX3	0.000502084
KCNA1	0.000501695
LRRC10B	0.000501397
RAB40AL	0.000501321
MC3R	0.000501229
NRG3	0.000501022
TMSB4Y	0.000500875
CRYAA	0.000500717
AK9	0.000500169
COL28A1	0.00049996
PIGS	0.000499825
NXNL2	0.000499733
TMEM222	0.000499564
HIPK1	0.000499109
RSU1P2	0.000498506
LSM2	0.000498424
TNR	0.00049834
PDYN	0.000497963
CNTNAP4	0.000497937
CREG2	0.000497891
POTEM	0.00049789
ZNF24	0.000497619
GRIA1	0.000497604
SIGLEC6	0.000497267
PCSK6	0.000497265
NAALADL1	0.000496995
ZIM3	0.000496802
C11orf97	0.000496563
ICAM1	0.000496335
ANXA2R	0.00049629
PRAMEF12	0.000496085
TEDDM1	0.000495848
UCHL1	0.000495733
CYP4A11	0.000495654
PAX2	0.000495641
PRPH2	0.000495609
CXorf58	0.000495238
ADGRA2	0.00049481
MIOX	0.00049466
MAEA	0.00049462
TRIM55	0.000494442
RBM46	0.000494366
KCNIP1	0.000494078
ZNF154	0.000494044
PRODH2	0.000494026
IL26	0.000493836
DEFB1	0.000493773
BCO1	0.000493685
TRIM37	0.000493277
ENGASE	0.00049307
MRPL52	0.000492831
POM121L2	0.000492602
OR51B2	0.00049258
NKAIN3	0.000492504
TM4SF18	0.000492149
SPSB1	0.000491974
STK16	0.000491774
PCGF5	0.000490688
FAM171A1	0.00049065
FCRLB	0.000490462
CD160	0.000489623
MACROD2	0.000489552
CYP24A1	0.000489482
DRD4	0.00048925
ONECUT3	0.000489205
DIRAS2	0.000488438
COL4A4	0.000487941
U2AF1L4	0.000487869
UCMA	0.000487595
UTS2R	0.000486874
OR1J2	0.000486687
GRINA	0.00048654
LYPD4	0.000486351
ALG6	0.000486156
EXOSC10	0.000486056
OOSP2	0.00048587
DEFB125	0.000485829
C14orf178	0.000484994
GUSBP5	0.000484877
TLE6	0.000484841
OR51A1P	0.000484838
TIFAB	0.000484805
RAX	0.000484093
KCNC4	0.000483944
IRAK1BP1	0.00048384
TRAT1	0.000483731
CXXC4	0.000483671
PHF14	0.000483653
RNF114	0.000483647
RPE65	0.000483447
ZNF219	0.000483319
CXCL9	0.00048287
NUDT2	0.000482747
GADL1	0.000482704
APOL4	0.000482645
MAGEA4	0.00048243
CLIC1P1	0.000482024
UFC1	0.000481702
SERPINA6	0.000481535
TBC1D10A	0.000481336
ENG	0.000481252
SP3P	0.000481189
IAPP	0.000480468
NCL	0.000479673
CTLA4	0.000479655
ZNF470	0.000479326
ATP8B4	0.000479208
ZNF782	0.000478982
PRB4	0.000478646
HTR1D	0.000478546
ZNF514	0.000478542
CEP55	0.000478453
CREB3L4	0.00047845
AIM2	0.000477816
KRT36	0.000477812
TMPRSS15	0.000477768
TBRG1	0.000477209
LRRC19	0.000477142
PIGA	0.00047702
MDGA1	0.000476998
ARMC12	0.000476883
TUBA8	0.000476781
GRM3	0.000476759
TLX3	0.000476654
GOT1L1	0.000476508
RGS13	0.000476293
FBXW9	0.000476273
FAM124B	0.000476071
DDX3Y	0.000476012
PANX3	0.000475719
C16orf54	0.000475525
CNBD1	0.000475466
OR10H2	0.000474699
ARL8A	0.000474511
EIF1AY	0.00047446
GRM6	0.000473817
CLIC6	0.000473807
TP53BP2	0.000473755
SESN3	0.00047371
SLC44A5	0.000473661
CABP5	0.000473195
DCD	0.000472661
ARG2	0.000472186
OR2F1	0.000471804
MUC16	0.000471777
AMER2	0.000471384
OLFM4	0.000470973
OR51I2	0.000470841
RRM2B	0.000470706
HMGN2	0.00047048
MED16	0.000470345
RAX2	0.000470231
CYP2C8	0.000470066
SP7	0.000469802
CDH12	0.000469755
AADAC	0.000469739
FSCN2	0.00046972
TNFSF9	0.000469592
LAIR2	0.000469095
MBTPS1	0.000469093
PKP4	0.00046881
PVALB	0.00046868
ERI2	0.000468118
DSTYK	0.000467855
TWF2	0.000467806
C17orf50	0.000467757
GFRA2	0.000467682
TMEM239	0.000467627
TEX9	0.000467356
HSPA6	0.00046688
RPA3	0.000466795
CELA3A	0.000466133
AQP6	0.000466032
NLRP14	0.000465973
KRTAP2-1	0.000465622
OMP	0.000465181
LRFN4	0.000465159
RTP4	0.000465024
ELOVL5	0.000464337
FGF5	0.000463372
ZPBP	0.000463356
ATP1A4	0.000463346
SLC6A4	0.000463183
OPRM1	0.00046309
RRN3P2	0.000462583
FABP7	0.000462216
TPSB2	0.000462128
GUSBP2	0.000462119
CYP4F2	0.000462088
SGO1	0.000461876
KRT3	0.000461875
MNX1	0.000461857
LACRT	0.000461829
GPATCH2	0.000461695
CLRN1	0.000461479
TKTL2	0.000461164
FBXO43	0.000461159
ZNF880	0.000461154
ZNF792	0.000461154
CDC20B	0.000461079
ITIH2	0.000461053
LRP12	0.000460765
BEST1	0.000460663
RAPSN	0.00046061
TRIM16L	0.000460098
LSM5	0.00046009
SLCO6A1	0.000459664
BPIFA3	0.000459659
CDK15	0.000459635
MEGF6	0.000458804
PIBF1	0.000458672
CABP4	0.000458607
FKRP	0.000458561
ZNF404	0.00045831
ZNF526	0.000458106
FGG	0.00045793
EYS	0.000457321
TRIM64EP	0.00045719
GLRA2	0.00045678
LDHAL6B	0.000456463
APOA5	0.000455996
PLGLB2	0.000455822
GNG3	0.000455769
MIER2	0.00045572
KRT40	0.000455552
PCDHA9	0.000455448
WDR87	0.000455318
MS4A5	0.000455308
C3orf49	0.000455085
MGAT5B	0.000455028
CCDC122	0.000454958
BPIFB2	0.000454956
EDARADD	0.000454731
OR52K3P	0.000454713
TFAP2D	0.000454698
A1BG	0.0004545
XPO1	0.000454059
DPEP3	0.00045386
ZNF879	0.000453806
HAS1	0.000453738
GDF3	0.000453709
TTC32	0.000453682
DDX11	0.00045348
GLS2	0.00045342
NETO1	0.000453303
GAL3ST2	0.000453199
UPK2	0.000452973
CLEC11A	0.000452896
CRYGC	0.000452869
KRT83	0.000452276
HNRNPA0	0.000452121
MOG	0.000452074
CRX	0.000452028
UBE3D	0.000452009
ZFAND2A	0.000451832
ZNF678	0.000451462
NKX1-1	0.000451132
CELA1	0.000450972
GPCPD1	0.000450498
SLC17A2	0.000450386
PDC	0.000450273
DAO	0.000449712
B3GALT1	0.000449542
TMEM61	0.00044948
TTC36	0.000449389
HRH3	0.000449234
TM6SF2	0.000448934
SIAH1	0.000448872
USP9Y	0.000448689
TAS2R4	0.000448136
PPBPP2	0.000447893
HCN4	0.000447871
SLCO1B3	0.000447861
TLR10	0.000447632
CMSS1	0.000447539
AQP8	0.000447362
FAM9B	0.00044724
FBXO16	0.000447228
TRIM42	0.000446965
DRD3	0.000446751
PRSS37	0.000446731
SPATA22	0.000446651
APOD	0.000446435
OR51B5	0.000446333
SLC6A2	0.000445855
TIGAR	0.000445809
CSH1	0.000445279
VWC2	0.000445259
CLHC1	0.000445212
TMEM114	0.000444948
KRT33A	0.000444766
FRZB	0.00044476
PRSS36	0.000444617
ERV3-1	0.000444613
PAX9	0.000444585
NCALD	0.000444314
VN1R10P	0.000443755
SRSF3	0.000443727
ERVV-1	0.00044351
PAXIP1	0.000443331
PRR18	0.000443129
SLC27A6	0.000442952
KIFC3	0.0004427
IFNB1	0.000442692
FRMD8P1	0.000442446
TAF1L	0.000442315
[truncated: 14,740 more rows]

## Sheet: Supplementary Table 6
Supplementary Table 6. Feature importance analysis for Parkinson's disease case-control classifier.
Gene	SHAP
PTCHD4	0.0159983
EDA2R	0.013706
LHFPL4	0.0133644
EYA4	0.00950682
RANBP17	0.00782123
GTF2IRD2	0.00700129
CDH10	0.00662263
LRRN3	0.00614974
GREM2	0.00586666
SLC6A15	0.00568005
WFDC10A	0.0056558
ABCB5	0.00564784
EPHA6	0.00542526
CDKN2A	0.00536359
ZNF518B	0.00524543
NEFH	0.00514425
ASXL3	0.00511036
DACH2	0.0049619
EPHA5	0.00489948
ECEL1	0.00479333
PCDHGB6	0.00469512
PRKAR1AP1	0.00460955
BRINP1	0.00460489
KIR3DL3	0.00457819
SNTG1	0.00456237
TAS2R16	0.00443132
SEMA3E	0.00435665
UTS2B	0.00423966
LMO3	0.00412308
CCDC184	0.0041215
DPYSL4	0.00409847
CCDC144A	0.00409525
ROBO2	0.00407487
KCNS1	0.00400344
FIGN	0.00400031
BMP6	0.00390641
ZNF93	0.00390035
SPAG6	0.00385832
ZMAT3	0.00376301
STK19	0.00375454
C2	0.00373919
SYCP1	0.00373731
C2orf27A	0.00371873
CSMD1	0.00370854
LDHC	0.00369166
PCDHB3	0.00366171
GABRA6	0.00365656
HSD11B1	0.00361011
ANKRD55	0.0036053
TAS2R50	0.00357764
WNT8A	0.003567
TENM1	0.00354196
AMBN	0.00354172
MOV10L1	0.00354007
POU3F4	0.00348492
GAPT	0.00347683
SYCE1L	0.00347428
RNF17	0.00343305
TDRD9	0.0034084
FSHB	0.00339412
ADAM12	0.00336722
OR2J3	0.00336433
GALP	0.00336373
CLEC5A	0.00333649
SYCE1	0.00333215
KIRREL2	0.00332079
PRAMEF12	0.00331458
MC3R	0.00328193
BCORP1	0.00327834
NAP1L2	0.0032751
CSN2	0.0032711
AIPL1	0.00325388
OTUD7A	0.00324467
ALX1	0.00323802
APLNR	0.00321705
GSTM1	0.00321573
OR6A2	0.00321288
FRG2EP	0.00320919
PIEZO2	0.00320664
SPRN	0.0032057
EMC10	0.0032031
FSCN3	0.00320001
ZCCHC12	0.00319889
PCDHB4	0.0031953
RHD	0.00318462
ATF7IP2	0.00316685
ZDHHC11	0.0031628
TFAP2D	0.00314988
POMZP3	0.00314985
PLAG1	0.00311839
GPR52	0.00311506
AWAT1	0.00309925
PCDH17	0.00309236
GTF2H2B	0.00308632
KCNMB2	0.00305792
FBLL1	0.00305591
SRP9	0.00303229
OPCML	0.00300578
ZNF300P1	0.00300094
REG4	0.00299489
ZP2	0.00298349
GRTP1	0.00298174
NEUROD4	0.00298166
NLRP2B	0.00297711
NPPC	0.00297312
TRIM22	0.00295697
AOX2P	0.00295573
NKAPL	0.00294237
OR2M4	0.00293108
C17orf97	0.0029259
SLC4A10	0.00292385
INTS4P1	0.00291695
PNMA2	0.00291183
CCZ1	0.0029115
OR7E37P	0.00289744
ZNF180	0.00289085
RHBDL3	0.00289084
PRAME	0.00289039
PPEF1	0.00288596
KIAA0825	0.00288389
CYP1A1	0.00288357
ECHDC3	0.00287456
ZCCHC13	0.00286357
DEFB127	0.00286126
IL23R	0.00285527
PYHIN1	0.0028422
GPR21	0.00284117
IGHG1	0.0028196
HLA-DPB2	0.00280017
PCDHB2	0.00277687
NAPRT	0.00277284
EPHX4	0.00277253
NLRP11	0.00276951
NEFL	0.00276145
SYT3	0.00275744
ADORA3	0.00274881
MRPS21	0.00272949
ZNF77	0.00271413
SIGLEC11	0.00270677
PCSK1	0.0027012
OR51B5	0.00269852
VENTX	0.00269042
OR5V1	0.00268479
FREM3	0.00267938
ANP32D	0.0026735
GALNT13	0.00267202
TAF1B	0.00266497
TRIM58	0.00266378
ZFP42	0.00266147
CDC14C	0.00265433
TMEM196	0.00264593
ANXA2P3	0.00264001
GPR75	0.00263819
SELE	0.00262807
CHIT1	0.00262217
SMCP	0.0026131
CRLF1	0.0025974
OSTCP1	0.00258458
TMEM253	0.00258173
SSTR4	0.00257958
KCNV1	0.00257561
PLXDC1	0.00257464
HRK	0.00257396
HTN3	0.00256932
TEX12	0.00256924
KCNG4	0.00256714
NEUROG2	0.00256241
FBLN7	0.00256238
ZNF215	0.00255625
CES1P1	0.00255548
ZIC2	0.00254623
AEN	0.00253863
CST2	0.00252352
NR2E1	0.00249353
CD69	0.00249133
SMDT1	0.00248947
MYLK4	0.00248916
PRM2	0.00248589
PCDHB8	0.00247962
DNAJB8	0.00247957
PEX6	0.00246885
CAPN6	0.00246717
PKNOX2	0.00246465
CSPG4P5	0.0024627
TMPRSS12	0.0024596
WFDC8	0.00245918
CLIC2	0.00245672
PMS2P5	0.00245018
LYG2	0.00244949
MPP4	0.00244889
EYA2	0.00244231
PAPPA2	0.00244133
WDR97	0.00243943
C3orf14	0.002423
SLC35G3	0.00241409
PI16	0.0024127
MMEL1	0.00241187
PRDM15	0.00240938
CROCCP2	0.00239988
IFNK	0.00239316
RP1L1	0.00239174
TIFAB	0.00238993
PRM1	0.00238913
NOX3	0.00238573
NPBWR2	0.00238107
E2F7	0.00236506
DPPA5	0.00236055
FMO3	0.00235244
DEFB119	0.00235158
DEFB129	0.00234151
SPDYA	0.0023408
FOXD4	0.002339
OR3A2	0.00233888
OOEP	0.00233695
GUCA1B	0.00232919
LRRC63	0.00232556
TCL1B	0.00232252
TRHDE	0.00232145
MCOLN3	0.00231574
ANP32C	0.00231284
LCN8	0.00231193
CD1B	0.00231011
CCNYL2	0.00230899
ATP23	0.00230581
PCDHA5	0.00230181
TIPIN	0.00228722
KRTAP4-1	0.00228647
PCDHGA10	0.00228257
AKAP4	0.00227934
MBNL3	0.00227718
GRAPL	0.00227654
SPG21	0.00227159
GDPD1	0.00227132
GPR82	0.00226939
ARHGAP26	0.00226759
C20orf202	0.00226268
POMC	0.00226137
TPBGL	0.00225766
RTP5	0.00225678
TP53I11	0.00224864
VN1R1	0.0022338
TRNT1	0.00223328
AGAP9	0.00223287
GUCA1A	0.00223206
ANXA2R	0.00223011
OTOR	0.00222868
CCDC174	0.00222241
VPS16	0.00222117
GFRA2	0.00222076
GRM5	0.00222059
LGALS12	0.00221029
ERI2	0.00220869
SRY	0.00220639
PRLH	0.00220239
BLID	0.00219841
GAS2L2	0.00219765
CECR7	0.00219761
RPS16P5	0.0021918
LCN10	0.00219049
NUP210P1	0.00218913
TXNDC8	0.00218838
SPATA45	0.00218763
SLC25A2	0.00218321
IL25	0.00218115
TMEM217	0.00217945
LTK	0.00217891
OTOF	0.00217735
OR51B6	0.00217017
DDB2	0.00216677
ADAM3B	0.00216318
CNTNAP5	0.00216115
UPF3B	0.00216074
RGMB	0.00216067
PIWIL2	0.00215735
CYLC1	0.00215385
CBX8	0.00215372
KRTAP5-2	0.00215233
KDM5D	0.00215233
C17orf98	0.0021522
MOS	0.00215157
SPINK2	0.00215152
TAS2R41	0.00215083
PATE1	0.00214772
LEXM	0.00214639
ANGEL2	0.0021385
SCN3A	0.00213469
CFHR3	0.00213416
METTL21EP	0.00213338
DNAH11	0.00213031
HSF5	0.00211841
SOX14	0.00211785
PCGF1	0.00211049
BTN1A1	0.00210866
ZNF474	0.00210786
PRRG3	0.00210394
TDRD5	0.00210243
OR1I1	0.00210234
COLQ	0.00210227
ERICH1	0.00209959
CYP4F8	0.00209895
IL12RB2	0.00209826
CBLN3	0.00209672
PPIL3	0.00209102
XKR6	0.00209011
GNG13	0.00208941
ZFR2	0.00208876
GPR31	0.00208173
DNLZ	0.00208157
KIR2DL3	0.00207749
C11orf87	0.00207696
CRYGC	0.00207573
AATF	0.00206991
RAD21L1	0.00206967
KRTAP4-12	0.00206859
SMIM3	0.00206788
GFRA4	0.00206508
SCN11A	0.0020623
MICB	0.00206135
TRIM42	0.00205856
PDPR	0.00205626
TEX28	0.00205233
ULBP3	0.0020467
NEUROG1	0.0020375
GRM3	0.00203552
TEDDM1	0.00203278
RLN3	0.00203229
IL22	0.00202936
FRMD7	0.00202888
OR51I1	0.00202539
DDX11L2	0.00202408
SIAH3	0.0020194
GH1	0.00201697
COL23A1	0.00201451
OR8B8	0.00201096
CTNND2	0.00201068
ESX1	0.00201026
LRRC74A	0.00200928
OR1F1	0.00200879
GJA3	0.00200563
OR13C4	0.00200251
SMIM17	0.00200085
PRSS54	0.00199664
DDIT4L	0.00199627
PRORY	0.00199498
IFNA7	0.00199489
OR11A1	0.00199445
KCNJ1	0.00199426
IFNA17	0.00199423
ZSCAN10	0.00199399
KCNK2	0.00199341
LYZL6	0.00199125
ZNF418	0.00199016
KRTAP2-1	0.00198982
RFPL1	0.00198613
PRPS1L1	0.00198298
USP32P2	0.00197934
CYP2A7P1	0.00197842
SALL3	0.00197673
FCGR3B	0.00197643
GBX2	0.00197449
UBE2DNL	0.00197409
LINGO2	0.00197211
TAS2R38	0.00197169
ZNF549	0.00196984
ADAM3A	0.00196879
SCML2	0.00196761
SLC14A1	0.00195284
GDF15	0.0019513
PRR30	0.00195039
FAM118A	0.00194224
HAGHL	0.00194084
KRTAP13-1	0.00193998
OR51B2	0.00193816
FNDC7	0.00193791
NOX5	0.00193701
TUBAL3	0.00193603
MMP13	0.00193513
TMSB4Y	0.00193304
DLL4	0.00193294
GP5	0.00193247
SLC6A5	0.00193078
L3HYPDH	0.0019302
CHPF	0.00192989
DMP1	0.00192844
NANOG	0.00192335
GABRA4	0.00192316
C3orf22	0.00192113
IQCF6	0.00191965
HBE1	0.001919
HTRA4	0.00191656
CALB1	0.00191536
FAM47A	0.00191264
POTEKP	0.00190967
HRH4	0.00190921
MRGPRX2	0.00190875
KLRF1	0.00190842
C7orf77	0.00190806
CCER1	0.00190637
ABCA11P	0.00190532
UNC5D	0.00190259
IFNA1	0.00189845
HMX1	0.00189816
FAM133A	0.00189565
PWP2	0.00189547
TAS2R8	0.00189437
MORC1	0.00189248
JUND	0.00188884
GPR107	0.00188809
IGSF22	0.00188605
FGD2	0.00188604
MANEAL	0.00188558
MCHR1	0.00188499
PRKCG	0.00188432
MKRN3	0.00187968
NYAP2	0.00187958
GJD4	0.00187888
NLRP5	0.00187874
PCDHB9	0.00187817
CILP2	0.00187773
ZNF311	0.00187574
GNRH2	0.00187429
AIM2	0.00187411
RNF114	0.00187308
MILR1	0.00187181
PLA2G7	0.00187142
SLC12A1	0.00187122
GPX5	0.00186766
DMRTB1	0.00186708
PTPRD	0.00186156
ANKRD20A11P	0.0018611
IRGQ	0.00185948
ZNF436	0.00185742
GPR6	0.00185199
TPD52L1	0.00185018
C6	0.00184839
RD3	0.00184828
SEMG2	0.00184137
UTS2	0.00184043
ZNF432	0.00184034
UBBP1	0.00183668
VCX2	0.00183525
CRABP1	0.00183405
GLB1L3	0.00183014
OR10A4	0.00182814
TNMD	0.00182761
ACTL7B	0.00182542
GAA	0.00182518
GBAP1	0.00182467
LHFPL5	0.00182312
TM4SF1	0.00182277
OR1G1	0.00181801
MAGEC1	0.00181726
IFNA2	0.00181676
THAP3	0.00181662
TBR1	0.00181615
OR1A1	0.00181334
IFNA21	0.00181226
RORB	0.00181219
CST9	0.00180997
OR10D1P	0.00180805
ESPNL	0.00180463
NTNG2	0.00180226
CCR4	0.0018007
CYP2A7	0.00179863
ZNF683	0.00179838
PRDM14	0.00179819
OR12D2	0.00179524
CSN3	0.00179366
CT55	0.00179348
LRRC37A2	0.0017931
ZNF589	0.00179036
OR2B6	0.00178111
SLC6A18	0.0017731
MAGEA1	0.00177275
SEMA4F	0.00176495
CYP46A1	0.00176447
SP1	0.00176097
APOF	0.00175923
ZNF483	0.00175451
CEP192	0.00175156
RETN	0.00174907
SYCP2L	0.00174766
OR2S2	0.00174655
ZNF208	0.00174552
FAM90A1	0.00174516
SLIT1	0.00174332
ZNF781	0.00174246
CDKN2C	0.00174216
LCN1	0.00174053
EID3	0.00173271
PCDHA2	0.0017314
ATP6V1E2	0.00172916
SPIC	0.00172853
TPRXL	0.0017285
SP7	0.00172733
ACOT4	0.00172679
ZC2HC1B	0.00172367
KHDC3L	0.00172356
L1TD1	0.00172229
RANGRF	0.00172166
BTN2A2	0.00172049
MAGEC3	0.00171899
C5orf47	0.00171788
TBC1D10A	0.00171709
ANKRD36BP2	0.00171482
CRYBA1	0.00171472
ADRA2B	0.00171352
DPY19L1P1	0.00171217
RPL39L	0.00170988
NUP85	0.00170757
GRM2	0.001707
MC2R	0.00170481
MDGA1	0.00170355
GUCY2D	0.00170092
CUX2	0.00170038
TBRG1	0.00169894
CAPN12	0.00169818
PLK5	0.00169759
TMEM31	0.00169477
TMEM235	0.00169388
HCN1	0.00169355
ZNF266	0.00169312
LALBA	0.00169152
FRG1EP	0.0016913
GJA10	0.00169129
CFC1B	0.00169066
C7orf33	0.00168603
ZSCAN22	0.00168378
GSTT2	0.00168099
LHX5	0.00168066
SP3P	0.00167702
TRIM37	0.00167092
BARHL1	0.00167011
TSC22D3	0.00166964
DUSP9	0.00166875
BEND4	0.00166683
CNOT4	0.00166655
ZNF229	0.00166587
CTAGE11P	0.00166257
PLA2G4C	0.00165869
TMEM95	0.00165724
KRT33A	0.00165695
TMEM114	0.00165656
PURG	0.00165576
SOX3	0.00165504
IGDCC4	0.00165438
PVALB	0.00165341
LENEP	0.00165322
CCDC83	0.00165307
PATE2	0.00165253
CDKN1A	0.0016525
SREBF1	0.00165225
CFAP74	0.00164912
TGIF1	0.00164846
KRT25	0.00164543
SMC4	0.00164234
FGF20	0.0016381
OR8D1	0.0016371
FDXR	0.00163249
OTP	0.00163177
ASIC5	0.00162739
HSF2BP	0.00162333
OR6B1	0.00162238
MRPS6	0.00161827
ELK2AP	0.00161723
KRT71	0.00161081
TMEM39B	0.00160753
PRKXP1	0.00160647
NTN5	0.00160632
NAA11	0.00160631
KLK3	0.00160386
GLYAT	0.00160383
CELA2B	0.00160365
PRDM12	0.00160222
PREX2	0.00160042
CLEC12A	0.00159971
SORCS2	0.00159768
MESP2	0.0015967
BPIFB6	0.00159445
CYP3A7-CYP3A51P	0.00159213
IL1RAPL1	0.00159029
KRTAP4-2	0.00158932
PDE4A	0.00158931
JAKMIP1	0.00158878
ODF3	0.00158844
LIPI	0.00158709
NOL4	0.00158459
NOBOX	0.00158394
LOXHD1	0.00158386
RSAD2	0.00158311
SLC25A35	0.00158235
NOXO1	0.00158158
LCN15	0.00158129
RNF19A	0.00158098
OXGR1	0.00158034
OR3A1	0.00157524
FLYWCH1	0.0015746
OR2B2	0.00157427
USP26	0.00157349
VN1R3	0.00157304
GABRB2	0.00157297
OR5H1	0.00157271
FRMD8P1	0.0015723
TPTE2P6	0.00157114
ZNF732	0.00157072
DNASE1L3	0.00156967
TGM4	0.00156948
ACTL7A	0.00156923
SLC6A3	0.00156814
FCRLB	0.00156706
RFX4	0.00156277
SYT15	0.00156135
FBXW4P1	0.0015604
UBE2NL	0.0015568
HSPB9	0.00155676
ZNF556	0.00155528
RGS13	0.00155517
CLCN1	0.00155313
IFNL1	0.00155278
CLCA3P	0.00155263
IGF2BP1	0.001552
KLHDC7B	0.00155118
MIF	0.00155118
TAS2R13	0.00154689
C1orf100	0.00154561
CCT8	0.00154559
SLC22A24	0.00154088
OR2W1	0.00154042
PPIEL	0.00154036
ZNF385B	0.00153813
GCM2	0.00153629
FAM106A	0.00153614
TMEM190	0.00152721
RHAG	0.0015256
SEMA5A	0.0015183
ADAMTSL2	0.00151711
GPRC5D	0.00151706
TVP23B	0.00151688
PSKH2	0.00151653
TRH	0.0015155
SPEM1	0.00151525
CPNE7	0.0015147
U2AF1	0.00151361
C17orf78	0.00151147
ACSBG2	0.0015109
BTF3P13	0.00150798
ERAP2	0.00150633
GK2	0.00150601
CDRT15	0.00150531
CXXC4	0.00150502
LRRC3	0.00150397
ADM5	0.00150349
CCL1	0.00150347
HS2ST1	0.00150308
UCMA	0.00150182
NACA2	0.00150066
LINGO3	0.00150029
HTR2C	0.00149954
SEC31B	0.00149921
NPY2R	0.00149836
HLA-G	0.00149708
MYH15	0.00149626
CST11	0.00149539
GREB1	0.00149529
XKR4	0.0014944
CORT	0.00149373
BTF3P12	0.00149167
ADAD2	0.00149027
SLC17A7	0.00148972
AIRE	0.00148925
SLC5A11	0.00148919
PPBPP2	0.0014891
EEF2	0.00148884
OR5J2	0.00148766
GLI4	0.00148766
ART5	0.00148673
PARP15	0.00148507
MBD3L2	0.00148469
SLFN13	0.00148441
AMER2	0.00148178
GCNT1P1	0.00148063
PP2D1	0.00147945
CREG2	0.0014791
GPR50	0.00147799
ZFY	0.00147775
BEGAIN	0.00147723
TNFSF18	0.00147621
HTR3A	0.00147523
KRTAP4-4	0.0014741
OR2H4P	0.00147387
TIGD6	0.00147387
AGAP4	0.00147344
ZPBP2	0.00147313
FABP3P2	0.00147272
LRGUK	0.00147141
ZSCAN12P1	0.00147116
PSMG4	0.00147012
PTH2	0.0014701
LRTM1	0.00146972
LRRD1	0.00146962
PCDHGB7	0.0014679
TAS2R19	0.00146768
RPP25	0.00146766
ADAMTS19	0.00146597
WNT16	0.00146365
CETP	0.00146363
DKKL1	0.00146278
SULF2	0.00146259
ZNF274	0.00146252
GSX1	0.00146134
IRGC	0.00145925
MPV17L2	0.00145903
VSX1	0.00145799
GNG3	0.00145795
STIP1	0.00145778
CYMP	0.00145738
SIK1	0.00145717
ZNF322	0.0014558
PAOX	0.00145535
TFRC	0.0014553
CHD3	0.00145394
RNF148	0.00145245
TSGA10IP	0.00145125
CDC20B	0.00145039
CRYBA4	0.00144801
TECRL	0.00144778
ZNF792	0.00144754
TAAR2	0.00144724
RET	0.00144633
MEGF10	0.00144475
OR2L2	0.00144461
TEX33	0.00144461
STK32B	0.00144386
CCR8	0.00144256
ACKR1	0.0014419
PIGA	0.00144111
SSX2B	0.00144108
PDYN	0.00143985
CT62	0.0014395
OR2A4	0.00143631
CCNA1	0.00143425
ESM1	0.00143412
CACNG3	0.0014338
PLG	0.00143249
MALRD1	0.00143098
OVOL3	0.00142819
IL21	0.00142757
HLA-DRB6	0.0014268
SNX31	0.00142595
ZNF541	0.00142453
SPP1	0.00142435
OR2C3	0.00142274
ZNF23	0.0014202
FAM205BP	0.00141784
MC5R	0.00141776
ADAM6	0.00141706
SSX3	0.00141611
VGF	0.00141508
METTL18	0.00141463
GPAT4	0.0014117
ANGPTL4	0.00141062
BCKDHB	0.00141044
SHC1P1	0.00140874
SLC30A8	0.00140845
UCHL1	0.00140695
ISL1	0.00140644
GHRL	0.00140629
ZNF830	0.00140621
GPHB5	0.00140588
EFCAB10	0.00140564
TSGA13	0.00140557
DRICH1	0.00140418
GDF3	0.00140293
CCDC87	0.00140255
DDX53	0.00140207
GRM6	0.00140072
FRG1JP	0.00140052
ZNF560	0.00139927
DAZL	0.00139927
C7orf31	0.00139918
SHOX	0.00139648
SLC17A6	0.00139584
CATSPER3	0.00139574
EGR4	0.00139541
RHO	0.00139498
KCNK4	0.00139448
SEC1P	0.00139373
MAP1LC3C	0.00139306
ASMT	0.00139261
GHSR	0.00139149
IFNL2	0.00139043
SCART1	0.00138923
CEP128	0.00138917
PMCH	0.00138641
ZBED1	0.00138492
DSCR4	0.00138444
CADM3	0.001384
RUNDC3B	0.00138343
ARHGAP22	0.00138167
CXCL9	0.00138154
SLC25A44	0.00138123
OPRD1	0.00138059
VN1R5	0.00138039
OR4D1	0.00137695
NRIP1	0.00137286
SPAM1	0.00137271
POU2F3	0.00137217
TAS2R10	0.00137186
ZPBP	0.00136933
HYAL1	0.00136869
BTBD18	0.00136785
GUCY2C	0.00136781
IGFALS	0.00136601
ARMC12	0.0013639
VPREB3	0.00136308
KIF15	0.00136206
DLEU7	0.00136054
DLL3	0.00135944
SCN10A	0.00135935
AGTR2	0.00135935
SPATA3	0.00135923
SSX1	0.00135888
HSD17B14	0.00135714
OR52A1	0.00135537
ZNF415	0.00135511
OLFM2	0.00135396
RPS2P45	0.00135386
RHOXF1	0.00135332
TGM6	0.00135316
DIRAS2	0.00135273
ERBIN	0.00135264
HMGN2P46	0.00135259
DEFB125	0.00135213
FOXB1	0.00135178
OCM2	0.00135155
ICOSLG	0.00135114
CCND2	0.00135048
BMP15	0.00135029
C3orf49	0.00134944
MRPL55	0.00134938
EFCAB13	0.00134937
OXT	0.00134905
MEGF6	0.00134809
SUMO4	0.00134763
RFESD	0.00134581
ELSPBP1	0.0013447
SLC25A31	0.00134435
NELL1	0.00134426
TNFRSF17	0.00134313
PASD1	0.00134294
ADAM18	0.00133776
SPATA1	0.00133695
OR52D1	0.00133494
RBM11	0.00133427
ZIK1	0.00133398
CNGB3	0.00133377
OR2F1	0.00133298
GTSF1L	0.00133237
CCDC96	0.00133066
KIAA0319	0.00132963
IGLL1	0.00132934
ERVV-1	0.00132919
FAM217A	0.00132776
TECTB	0.00132742
NPIPB15	0.00132638
TSHZ2	0.00132636
ZNF391	0.00132628
SLC25A26	0.00132391
HRH3	0.00132354
C10orf62	0.0013228
MAGEB4	0.00132253
SLC12A5	0.00132246
CLEC4F	0.00132121
LY6K	0.00132121
LHX4	0.00131981
ZNF114	0.00131944
ERN2	0.00131824
WFDC11	0.00131718
HLA-DPA2	0.00131712
KIR2DL1	0.00131634
HMGCLL1	0.00131447
KCNH7	0.00131426
RBPJL	0.00131339
SMIM2	0.00131335
FAM216B	0.00131303
RPGRIP1	0.00131223
NGEF	0.00131132
HDAC10	0.00130592
RSAD1	0.00130582
MYCN	0.00130518
PPP3R2	0.00130456
OR2B3	0.00130288
ARMC10	0.00130274
BPIFB4	0.00130173
OLIG3	0.00130153
BATF	0.00130093
CREB5	0.00130024
SLC13A4	0.00129852
MEP1B	0.00129645
COL10A1	0.00129579
TNFSF9	0.00129379
SHISA6	0.00129182
KRTAP8-1	0.0012912
MED16	0.00129085
BRDT	0.00129082
TOX2	0.00128907
PSMA8	0.00128896
NPFFR2	0.0012889
KIAA1210	0.00128844
SCT	0.0012881
TFG	0.00128721
CLIC1P1	0.00128696
KLHL3	0.00128686
GAGE1	0.00128569
ANXA2P1	0.00128449
HES5	0.00128416
ARNTL	0.00128406
PDZD9	0.0012832
FGF8	0.00128246
IL17A	0.00128217
C2orf50	0.00128087
GPR62	0.00127913
NRG2	0.00127913
SLC38A11	0.00127864
CTSG	0.00127788
TAS2R40	0.00127761
GOT1L1	0.00127749
SUGT1P3	0.00127666
CST4	0.00127608
HES7	0.00127549
CCDC182	0.00127509
TADA3	0.00127276
BTNL2	0.00127193
ADAM30	0.00127166
INSL6	0.00126849
OR2L13	0.0012672
SLC22A13	0.00126625
POU4F2	0.00126536
ZMAT4	0.00126459
EN2	0.00126438
RFPL3	0.00126334
MIXL1	0.00126318
ACTR3BP2	0.0012629
GALNTL6	0.00126275
AZIN2	0.0012626
ZC3H3	0.00126254
ACRV1	0.00126217
SPATS2	0.0012617
SLC16A8	0.00126121
OSM	0.00126114
TLX3	0.00126073
KCNA10	0.00125873
MCM8	0.00125704
ATP6AP1L	0.00125548
FAM162B	0.00125528
EDA	0.00125423
RXFP1	0.00125414
LTA	0.00125392
SRSF3	0.0012537
MBTPS1	0.00125354
TAAR8	0.00125332
TM4SF18	0.0012522
KRBOX1	0.00125149
STPG2	0.00125074
REM1	0.0012505
MRPL52	0.00124906
IGDCC3	0.00124891
MAGEB6	0.00124703
LGALS14	0.00124689
IAPP	0.00124585
C4orf45	0.00124281
KRTAP9-4	0.00124212
TUBB7P	0.00124189
ADAMTS20	0.00124118
CRYBB2	0.00124071
ACVR2B	0.00123944
CFAP57	0.00123877
TMEM37	0.00123797
KCNJ9	0.00123791
SOCS1	0.00123708
ADCY10	0.0012366
OR10H2	0.00123654
KRTAP11-1	0.00123643
SDCBPP2	0.00123593
IBSP	0.00123572
DNASE2B	0.00123541
FGF3	0.00123535
UNC50	0.00123406
GZF1	0.00123224
GLRA2	0.00123187
VWC2	0.00123134
PDCD6	0.00123085
FLT3	0.00122951
GPR101	0.00122944
MTNR1B	0.00122908
SLAMF9	0.00122873
INSL4	0.00122855
CORIN	0.0012284
STRIP1	0.0012281
ITGAD	0.00122801
OR52K3P	0.001228
FEZF2	0.00122744
RP9	0.00122734
PDC	0.00122716
P2RX3	0.00122601
NEFM	0.0012235
FATE1	0.00122336
NDST4	0.00122327
ZNF813	0.00122275
TMEM132E	0.00122132
MSLN	0.00122113
OMP	0.00121957
FAM170B	0.00121842
WDR19	0.00121728
HTR1D	0.00121697
CHRNB3	0.00121569
CACNA1G	0.00121532
GNB1L	0.00121503
CHRNA9	0.00121482
TBX22	0.00121442
RIMBP2	0.00121403
TMCO2	0.00121149
APLN	0.00121075
FUT5	0.0012104
TTC12	0.00121009
TMEM62	0.00120978
PCDHA10	0.00120937
CST9L	0.00120906
SEC14L3	0.00120837
CYTL1	0.00120826
CXCL10	0.00120786
TTC36	0.00120762
OR3A3	0.00120732
MT1H	0.00120624
KRTAP3-1	0.00120605
SYT16	0.001206
ZNF506	0.00120362
GJA8	0.00120359
SLC28A1	0.0012029
SND1	0.0012022
ATP6V1C1	0.00120086
BORCS8	0.00120073
SLC2A6	0.00120019
RTP4	0.00119915
SESN2	0.00119809
USH2A	0.00119788
TAL2	0.00119638
CD6	0.00119572
IL21R	0.00119485
ATP9B	0.00119455
CCDC177	0.00119415
CXCL14	0.0011934
VSTM2A	0.00119283
MGAT4C	0.00119279
GCNT4	0.00119272
PSG2	0.00119228
PDGFRA	0.00119167
TEKT2	0.00119109
FOS	0.00118936
CER1	0.00118894
WARS2	0.00118827
UBC	0.00118578
IFNA8	0.00118565
WFDC9	0.00118474
FCRL4	0.00118468
IGKV1OR2-118	0.00118454
CYP11B1	0.00118448
HMHB1	0.00118379
HSPA6	0.00118261
SP5	0.00117854
TAS2R9	0.00117813
CTAG2	0.00117717
ACMSD	0.00117644
PRG4	0.00117599
UBBP2	0.00117575
MMP16	0.00117509
DLGAP1	0.00117435
CEP162	0.00117423
NCR2	0.00117414
TULP1	0.00117372
IL5RA	0.00117346
TERF2IP	0.00117334
SYS1	0.00117313
MACROD2	0.0011725
OOSP2	0.0011721
ANKRD19P	0.00117185
PSG11	0.00117143
AMELX	0.00117123
PAGE5	0.00117019
JAKMIP2	0.00116755
LIPJ	0.0011662
GRIA4	0.00116522
ADRA1D	0.00116499
TBKBP1	0.00116391
CR1L	0.00116375
MFSD14C	0.00116365
DSTYK	0.00116361
ZNF29P	0.00116312
TULP2	0.0011629
SFRP2	0.00116288
SAG	0.00116241
USP9Y	0.00116178
TBC1D24	0.0011609
PKDREJ	0.00115972
ACE2	0.00115839
VRTN	0.00115802
TIGD4	0.00115761
PPY2P	0.00115712
RRM2B	0.00115699
ACCS	0.00115646
HDGFL1	0.00115637
HACE1	0.0011536
LYZL4	0.00115335
LRRC52	0.0011533
VWDE	0.00115189
FGF23	0.00115161
THNSL2	0.00115159
UBE2Q2L	0.00115122
TESK2	0.00115088
JADE2	0.00114931
ISM1	0.00114916
XRRA1	0.0011491
DMBX1	0.00114869
PCDHGB8P	0.00114846
CHORDC1	0.00114843
FXYD4	0.00114806
COL26A1	0.00114801
MPL	0.0011478
ZNF223	0.00114632
ZNF595	0.00114607
FKBP1B	0.00114601
TAS1R2	0.00114577
KIAA0100	0.0011456
PHOSPHO1	0.00114485
CNBD2	0.00114457
DEFB126	0.00114378
KLRG1	0.00114354
NXNL2	0.0011435
SCN4B	0.00114342
SYCE3	0.00114166
CALCOCO2	0.00114128
NYX	0.00114063
ZNF497	0.0011399
NPHS2	0.00113937
TSPAN16	0.00113928
PRNT	0.00113902
OR12D3	0.00113834
ADGRB2	0.00113817
CCDC33	0.00113754
SMIM21	0.00113673
MUC16	0.00113652
TERB1	0.00113633
CLYBL	0.0011363
SATB2	0.00113454
PRDM7	0.00113419
KHDC1L	0.0011332
GNAT1	0.00113299
LMX1A	0.00113271
PCDHAC1	0.00113193
OR2F2	0.00112973
ZNF252P	0.00112897
AHRR	0.00112839
CDYL	0.00112825
MAGOH2P	0.00112785
LZIC	0.00112783
ADAM20	0.00112777
BMP10	0.00112759
ASCC3	0.00112751
GABRB1	0.00112727
CCT8L2	0.001127
MDGA2	0.00112677
ZNF808	0.0011265
GRK7	0.00112641
RBM3	0.00112609
CCDC105	0.0011258
FAM20C	0.00112559
MGAT4EP	0.00112463
TDRD1	0.00112457
SH2D6	0.00112398
NUS1P3	0.0011227
CNDP1	0.00112256
BEND2	0.00112234
LOXL4	0.00112109
FOXR1	0.00112102
OR7E24	0.00112094
MGAT5B	0.00112046
LMNTD1	0.00111993
CXCL13	0.00111894
GUCY2F	0.00111878
VN1R2	0.00111675
GUCY1B2	0.00111659
CHRNA6	0.00111549
HBZ	0.00111534
TSPYL2	0.00111525
PKD1L1	0.0011144
DMRTC2	0.00111439
SYT6	0.00111401
ROBO3	0.00111325
ARL6IP4	0.00111262
CPNE1	0.0011118
DDX4	0.00111157
E2F8	0.00111002
MRGPRX3	0.00111001
NMBR	0.00110962
CECR2	0.0011093
TEX35	0.00110916
HTR2B	0.00110776
OR2L1P	0.00110713
CALHM1	0.00110647
PIANP	0.00110636
ZFAND2A	0.00110545
SOHLH2	0.0011054
EPHB2	0.00110522
KRTAP10-11	0.00110442
RTP1	0.00110385
C9orf57	0.00110347
PI15	0.00110316
NCOA7	0.00110237
POM121L2	0.00110194
KRTAP4-11	0.00110127
ZSCAN1	0.00110062
FAM86B3P	0.00109993
EDDM3B	0.00109903
SLC6A2	0.00109883
RBM43	0.00109826
ERC2	0.00109823
SLC43A1	0.00109688
OGG1	0.00109685
ZP1	0.00109629
PRSS21	0.00109593
C12orf40	0.00109589
NR1I3	0.00109584
STUM	0.00109557
UBE3D	0.00109531
ZAR1	0.00109524
FAM124B	0.00109502
NBPF3	0.00109473
SLC22A1	0.00109471
BTLA	0.00109452
COL20A1	0.00109442
BEX5	0.0010942
OR1D2	0.00109325
TEX11	0.00109308
VWA8	0.00109257
AXDND1	0.00109229
TAS2R7	0.00109214
ADAMTS13	0.00109185
MLXIPL	0.0010918
TMEM26	0.0010915
SSMEM1	0.00109148
NETO1	0.00109138
PKD2L1	0.00109126
R3HDML	0.00109087
PHYHD1	0.00108988
TRPM1	0.00108979
C19orf81	0.00108974
HBD	0.00108922
OR10H1	0.00108904
ALG6	0.00108883
GTF2B	0.00108734
KRT40	0.00108734
SIGLEC16	0.00108571
IFNB1	0.00108564
SCIN	0.00108561
ZIM3	0.00108486
PCDHB14	0.0010845
ZNF593	0.00108363
BSND	0.00108314
SPATA31C2	0.00108308
ADAM7	0.00108291
PALD1	0.00108238
NLRP13	0.00108204
GPCPD1	0.00108182
PSPH	0.00108151
KRTAP9-3	0.00108093
TMEM200C	0.00108052
MCM10	0.00108038
CALR3	0.00108015
ZNF442	0.00107983
PAGE1	0.00107973
CSRNP3	0.0010794
KCTD16	0.00107859
NKAP	0.00107857
COL19A1	0.00107748
EIF4A2	0.00107656
SAGE1	0.00107618
CYSLTR2	0.0010755
EQTN	0.00107547
IFITM10	0.00107508
KCNH1	0.00107491
EML5	0.00107472
DCAKD	0.00107458
GLRA1	0.00107454
ATG10	0.00107442
ARHGAP28	0.00107429
ESR1	0.00107423
MMP17	0.0010742
LDHAL6A	0.00107299
CCDC181	0.00107232
ACTG1P17	0.00107218
THAP2	0.00107121
GPR17	0.00107107
ADCK1	0.0010708
PAX1	0.0010701
U2AF1L4	0.00106976
CALML6	0.00106857
LUZP4	0.00106854
REN	0.00106853
C2orf80	0.0010683
SMLR1	0.00106685
IGLV1-44	0.00106672
NDUFA4L2	0.00106557
OR7D2	0.00106489
PRCC	0.00106472
TP53BP2	0.00106435
LSM7	0.0010633
CRYBB3	0.00106319
C22orf15	0.00106261
PMS2P2	0.00106238
HCG27	0.00106181
TRIM71	0.00106165
TMPRSS11D	0.00106038
ANKRD22	0.00105925
DEFB122	0.00105896
GFRA3	0.00105827
SVOPL	0.00105784
TMEM52	0.0010577
RGS8	0.00105758
ZFP57	0.00105736
RRM2	0.00105735
USH1C	0.00105703
FLRT1	0.00105689
PRSS16	0.00105668
FIGLA	0.00105631
POU4F3	0.00105468
TAS2R4	0.00105434
PPEF2	0.00105404
MYLIP	0.00105341
CIR1	0.00105334
SPACA7	0.00105292
OR2H1	0.00105194
NEUROD6	0.00105181
SCYL1	0.00105144
MEPE	0.00105076
CDK15	0.00105056
FAM131B	0.00104993
HTR5A	0.00104984
APIP	0.00104921
CNTNAP4	0.001049
NXF3	0.001048
KRT82	0.00104775
TSPAN10	0.0010468
GPR174	0.00104644
FAM163B	0.00104624
OR51M1	0.00104532
KCNIP1	0.00104453
REC114	0.00104407
ZNF627	0.00104373
RPA3	0.0010434
CLEC4M	0.00104327
CRH	0.00104321
RBMXL2	0.00104281
SLC25A41	0.00104228
KRTAP5-8	0.00104212
CREB3L4	0.00104186
BLK	0.00104061
UBE2U	0.0010406
C9orf131	0.00103965
GPR27	0.00103808
COG4	0.00103686
PRG3	0.00103664
CCDC144CP	0.00103662
ZSCAN4	0.00103511
ASCL3	0.00103506
IL10	0.00103486
KYAT3	0.00103462
AHSG	0.00103415
RNF182	0.00103366
MOG	0.0010334
NTN3	0.00103296
CAGE1	0.00103272
CYB5D1	0.00103192
LRP12	0.00103187
MARCO	0.00103184
POU6F2	0.00103129
RNF212B	0.00103097
MIER2	0.00103066
LELP1	0.00103011
NAGS	0.00102814
LMO7DN	0.00102775
PCDHA9	0.00102762
MED15	0.00102748
APOBEC3D	0.00102734
SMAD6	0.00102707
FDFT1	0.00102625
SIGLEC7	0.00102571
GPAT2	0.0010256
TAS2R1	0.00102522
ZNF254	0.00102506
SESN3	0.00102505
CALHM3	0.00102487
SFTPB	0.00102471
WDR38	0.00102452
CLHC1	0.0010242
CLVS2	0.00102401
PITRM1	0.00102384
KLK4	0.00102383
OR10A5	0.0010233
KCNJ6	0.00102309
UGT2B28	0.00102284
TADA2A	0.00102267
CYP2C19	0.00102252
RNF144B	0.00102245
ABCC12	0.00102241
MTHFSD	0.00102184
TRIM16L	0.00102134
OR7A10	0.00101959
GRIK1	0.00101907
CRYGN	0.00101849
SCRN2	0.0010171
SLC7A13	0.00101694
XCL1	0.00101642
OR51B4	0.00101606
CRB1	0.00101604
ZNF705G	0.00101501
LCMT2	0.00101498
BIRC7	0.00101492
PRB1	0.00101414
TEX13B	0.00101265
GJC2	0.00101262
GUCY1A2	0.00101243
NRIP2	0.001012
PPDPF	0.00101173
TNP2	0.00101057
GPR132	0.00101007
KRTAP4-5	0.00100974
KRTAP9-9	0.00100972
DGKK	0.00100883
ELAC2	0.00100806
ITIH2	0.00100733
FOSB	0.00100676
C8orf82	0.00100635
OBP2A	0.00100627
PPY	0.00100626
BMP5	0.00100555
SLC10A1	0.00100455
SMR3B	0.00100406
PCGF5	0.00100361
HMGB3	0.00100259
UCP1	0.00100081
STK16	0.00100064
PGBD4	0.00100014
PSG3	0.000999181
DDX11	0.000999136
PROKR2	0.000998283
ACSM2A	0.000998231
PCDH9	0.000998128
FAM169B	0.000997782
CTCFL	0.000996936
CDX2	0.000996718
UXS1	0.000996575
CYLC2	0.000995626
GLG1	0.000995347
CLCA1	0.000995138
PCK1	0.000994576
RING1	0.000994184
CCDC154	0.00099309
IGKV1OR2-108	0.000992653
ALLC	0.000992489
ACOT6	0.000992035
CIB3	0.000991976
C11orf94	0.000991337
XPO1	0.000990424
C1orf167	0.000988169
CYP4A11	0.000986947
GUSBP1	0.00098688
CEP104	0.000985696
SYT9	0.00098569
THEMIS	0.000985282
NT5C1A	0.000984757
SLC47A2	0.000984585
ACTBP9	0.000983504
OPN5	0.000983145
KIAA0586	0.0009806
FAM170A	0.000980277
OR7A5	0.000980059
TP73-AS1	0.000979976
NFKBIA	0.000979784
KRT85	0.000979695
SPATC1L	0.000978901
TRIM67	0.000978468
NPVF	0.000977785
RNF151	0.000977735
NRG3	0.00097743
ANKRD60	0.000977409
TCN1	0.000977279
TMEM262	0.000977256
CCDC97	0.000977194
PTTG3P	0.00097703
GHRHR	0.000976992
FFAR1	0.000976764
NKAIN3	0.000976554
SPIN4	0.000975045
F7	0.000974549
ZNF184	0.000974259
TMC2	0.000973926
ATXN1	0.000973901
CBY3	0.000973176
NLRP14	0.000972387
KLRD1	0.000971538
PCDHB16	0.000971032
PCDH11X	0.000970776
KRTAP4-8	0.000970705
TIGD3	0.000970472
CLDND2	0.000969995
PMCHL2	0.000968964
CA5A	0.000968657
S100Z	0.000968188
PRSS33	0.000967782
WIF1	0.000967688
SLC16A4	0.000965955
MMP27	0.000965953
CHST7	0.000964952
LMBR1L	0.000964785
RTN4R	0.00096475
ZNF526	0.000963722
CLEC4C	0.000963702
KRT75	0.000963627
RYR3	0.000963308
KCNA1	0.000962681
C14orf178	0.000962244
NPBWR1	0.000960748
CYP7A1	0.000960538
CLDN23	0.000960494
OR4D2	0.000960448
FBN3	0.000960314
MYL10	0.000959274
MAJIN	0.00095922
C6orf15	0.000958312
CCDC17	0.000957475
GPR55	0.000957291
BHLHE41	0.000956885
HMGN2	0.000956637
FAM166A	0.000955959
UBL4B	0.000955938
MTO1	0.000955459
MFAP5	0.000955219
EFNA2	0.000955211
TPSD1	0.000954771
OXTR	0.000953501
CA5B	0.000952982
KRTAP1-3	0.00095251
ZNF782	0.000951462
NOG	0.000950224
EVX1	0.000950141
CA10	0.000949962
KIFC3	0.000949944
TRBV27	0.000949607
ZFP82	0.000949026
POLR2A	0.000948686
TMEM61	0.000947777
PSRC1	0.000947384
CNBD1	0.000947066
TNFRSF9	0.00094671
ZRSR2	0.000946353
AANAT	0.000946346
GTPBP6	0.000945999
IL17F	0.000945277
PM20D1	0.000944781
TTLL2	0.000944763
INSRR	0.000944559
ABCC8	0.000944522
TSPYL6	0.000944481
GRIN2A	0.000944366
TCEAL7	0.000943089
IWS1	0.000941856
TSACC	0.000941538
HIPK4	0.000941045
SCGB3A2	0.000940881
GRIA1	0.000939011
LINC00674	0.000938987
PCP4L1	0.000938945
IFNW1	0.000938451
DUSP21	0.000938377
LRRC37A5P	0.00093801
AKAP10	0.000937969
CCL26	0.000937776
TRAV12-2	0.000937632
ARL15	0.000937583
OR7A17	0.000936217
KRTAP17-1	0.000936
ERCC3	0.00093597
SHANK1	0.000935923
CHI3L1	0.000935833
ZNF492	0.00093534
SLC44A5	0.000934679
DAAM2	0.000933382
HSD17B7P2	0.00093325
CLK1	0.000932798
PCDHB13	0.000932678
TRIM59	0.000932278
HOXB1	0.000931891
MMP8	0.000931772
GAL3ST2	0.000931675
HCAR1	0.000930881
PRPH2	0.000930449
HFE	0.000930288
HCG22	0.000930112
SALL4	0.000929904
TBC1D28	0.000929812
MROH2A	0.000929353
CLRN1	0.000928705
SH2D4B	0.000928537
INAFM1	0.000927466
SHOX2	0.000926785
SGCG	0.000926711
HNRNPA0	0.000926604
SYNGR4	0.000926264
CABP5	0.00092614
ZNF629	0.000925202
TCEAL9	0.000924829
S100A7A	0.00092463
ACOT12	0.000924574
FMR1NB	0.000924351
CSMD3	0.000922733
CNR1	0.000922684
RGSL1	0.000922408
GLI2	0.000922386
PER2	0.000922299
PPWD1	0.000922229
CCDC85A	0.000921854
CNPY1	0.000920904
DEFB123	0.000919676
VN1R108P	0.000919042
TAS2R3	0.000918902
OR10C1	0.000918889
PSG6	0.000918352
STEAP4	0.000918183
AP4M1	0.000917883
NLRP4	0.000917458
POU5F2	0.000916493
HUS1B	0.000915914
TMEM255A	0.000915797
ACKR4	0.000915189
DPEP3	0.000914907
SSTR5	0.000914899
CYP4F11	0.000914543
ZNF154	0.000913897
NCALD	0.000913614
KRTAP19-1	0.000912273
FBF1	0.000911701
TFAP2E	0.000911654
PRPH	0.000911536
CNGA4	0.000911375
GZMK	0.000911271
IRF2BPL	0.000911126
DMRT1	0.000910816
GYPA	0.000910607
TPD52L3	0.00091044
DCAF7	0.000910373
PSD3	0.000910058
RABGGTB	0.00090992
PTPRT	0.000909673
BRS3	0.000909573
TLL2	0.00090873
GUSBP5	0.000908294
WDR87	0.000908094
AQP2	0.000907996
PRSS36	0.000907117
ZPLD1	0.000906881
GAPDHS	0.00090656
TRPC2	0.000906015
SLC16A11	0.000906013
KLHL14	0.00090525
LPA	0.00090429
SNCB	0.00090412
ONECUT1	0.000903661
FOXO6	0.000903418
CDH9	0.000903335
CADPS	0.000903211
GNGT1	0.000903176
COG8	0.000903077
MMP26	0.000902509
MICU2	0.000902331
TPK1	0.000902186
RAD54L2	0.000901125
OR1F2P	0.000900922
BAIAP3	0.000900886
CHRNE	0.000900814
MUC3A	0.000900658
DIO3	0.00089994
PLPPR4	0.00089926
GDF2	0.000898599
DEFA4	0.000898539
CNGA3	0.000897852
BHLHE23	0.000897323
TMIGD2	0.000897101
THAP5	0.000897036
HERC2P7	0.000896991
PDE10A	0.00089679
MMP11	0.000895851
PGAP1	0.000894785
FBXL8	0.000893817
HCRTR1	0.000892824
KRT84	0.000892692
BPIFA4P	0.000891286
PHEX	0.000891212
ADRA2C	0.000890712
IGHV7-81	0.00089063
SPATA18	0.000890263
TRPM8	0.000889601
MCF2	0.00088934
OR10H3	0.000887415
NPTX2	0.000887329
TMEM145	0.000886745
TAAR9	0.000886052
CCL20	0.000885564
NANOS3	0.000885563
PORCN	0.000885558
GTF2IP7	0.000885537
ERVFRD-1	0.000885431
LYZL1	0.000885263
NBPF4	0.000884513
NRK	0.000884308
FAM221B	0.000884078
SLC45A2	0.000883673
TREML4	0.000883064
TMEM207	0.000883064
NBEAP1	0.000882785
NAALADL1	0.000882282
INSM1	0.000881987
TAF7L	0.000881872
ZNF599	0.000881821
NCAN	0.000881712
ADA	0.000881575
FTH1P5	0.000881554
MBD3L1	0.000881386
IFI44L	0.000880948
GRK1	0.000880662
DIMT1	0.000880226
INSM2	0.000880182
ARHGAP36	0.000880027
OR8G1	0.000878818
RBM45	0.000878608
VWA1	0.000878412
FBXO16	0.000878053
RRH	0.000877966
INSL3	0.000877949
APOD	0.000877774
FZD9	0.000877572
FICD	0.000877538
ZNF682	0.000877309
FBXO15	0.000876485
DSPP	0.000875974
TMEM41A	0.000875467
HCRT	0.000874977
AREL1	0.000874853
ESRRG	0.000874173
TSPO2	0.000873157
GABRG2	0.000872819
AP1AR	0.000872109
SOX11	0.000871925
SMCO3	0.000871817
HYDIN2	0.000871143
LIN28A	0.000870966
ZNF157	0.000870856
RDH8	0.000870674
IMPG1	0.000870596
B3GLCT	0.000870491
FABP7	0.000869802
NPY6R	0.000869723
IMMP1L	0.000869427
HOXD1	0.000868587
CYP26B1	0.000867558
KLHL25	0.000867243
IRGM	0.000866876
NPAS2	0.000866805
CXCR3	0.000866329
IGHV3-75	0.000866224
NKX1-1	0.000865161
DLX2	0.000864732
ZNF696	0.000863913
ABCG8	0.000863536
DMRTA1	0.000863452
GALR1	0.000862957
NKX6-3	0.000862855
ARR3	0.000862664
ANKRD26P3	0.000862413
ADAD1	0.000862078
CPA3	0.000862026
C16orf78	0.000861744
SIRPD	0.000861579
LRRN4	0.000861353
PIGS	0.000861352
LRRC3B	0.000860886
CABP2	0.000860698
IGHD	0.000860494
IFNA16	0.000860493
SERPINI1	0.000860465
KCNRG	0.000860447
OR2C1	0.00086043
DUSP5P1	0.000860396
COLEC11	0.000860165
TAF1L	0.000860048
IQCF5	0.000859894
CPEB1	0.000859796
NME8	0.000859552
RSPH4A	0.000858645
TRPC3	0.000858315
GOLGA6L2	0.000857508
HES4	0.000857005
MTNR1A	0.000857003
BACE1	0.000856063
NPFF	0.000856054
KLHL21	0.000855509
TFCP2L1	0.000855378
WDR64	0.000854991
DDIT3	0.000854749
ZNF257	0.000854482
MAT2A	0.000853976
TPPP2	0.000853171
TPTE2P5	0.000852805
TEX37	0.000852695
AKAP3	0.000851802
PHOSPHO2	0.000851021
LHCGR	0.000850966
SLC26A2	0.000850964
FAM43A	0.000850103
BPIFA3	0.000849942
SLC10A2	0.000849012
OR2J2	0.000848255
SPATA32	0.000847995
IRS2	0.000847795
IFNA10	0.000846688
KIF2B	0.000846245
STH	0.000846227
ALS2	0.000845965
DPP3	0.000845949
ZNF575	0.00084531
OR1J2	0.000845206
ADGRG7	0.000845168
SLC22A2	0.000843627
SLC35E4	0.0008432
TP53TG3HP	0.000842816
TMEM178B	0.000842792
GOLGA2P10	0.000841979
USP32	0.000841811
CDKN2B	0.000841773
TAAR5	0.000841248
RHBDD1	0.00084082
GDAP1	0.000840474
CBX5	0.000840292
ST20	0.000838834
KRTAP3-2	0.000838359
ERP27	0.000838252
BPIFB1	0.000838248
TSSK3	0.000838236
SPESP1	0.00083819
LPAR4	0.000837753
KRTAP7-1	0.000837635
OXCT2	0.000837544
SLC22A11	0.00083744
HADHAP1	0.000837324
TDRD3	0.000837295
TMEM204	0.000837136
COL21A1	0.000837066
FAM9C	0.000836854
HMGB4	0.000836442
DCAF17	0.000835786
ATP1B4	0.000835471
UPK2	0.000835232
DEFB118	0.000835087
CDH22	0.000834579
CRISP1	0.000834388
VWA3A	0.000834303
TEX261	0.000834118
FRZB	0.000834023
TMEM132D	0.000833729
ENHO	0.000832528
HCN2	0.000831027
NAT14	0.000830722
WDR91	0.000830489
SERTM1	0.000830421
SLC7A3	0.000829922
PRR34	0.000828664
IL31RA	0.0008284
POLR2J2	0.000827949
CSN1S2AP	0.000827507
ADRA1A	0.00082637
VMO1	0.000826078
MYO1A	0.000826031
EDARADD	0.000825588
LGSN	0.000825583
CLIC6	0.000825342
DACT1	0.000825285
TMEM80	0.000825232
ZNF75A	0.000824881
FGG	0.000824761
AGXT	0.000823538
NAPG	0.000822953
GLP1R	0.000822786
ACTL9	0.00082195
L3MBTL4	0.00082121
SIGLECL1	0.000821156
ZNF675	0.000820296
CLDN20	0.000819872
OR10D3	0.000819838
TSC22D2	0.000819547
LRRC10B	0.000819196
KISS1	0.00081887
MED15P9	0.000818542
C3orf36	0.000818471
RBP3	0.000818029
AK9	0.000817642
NANOS2	0.00081742
CLEC1A	0.000817296
EFCAB7	0.000815998
PAX9	0.000815798
CPLX2	0.000815402
MORC3	0.000815342
SSTR1	0.00081478
PHLDA3	0.000814656
GALR3	0.000814207
ZBTB32	0.000813663
ICAM1	0.000813631
TTC9B	0.000813598
POC1B	0.000813321
LECT2	0.000813152
IL2	0.000813066
OR5L2	0.000812697
CHD1L	0.000812167
ACYP1	0.000812069
GALNTL5	0.000811656
SPRR4	0.000811393
RHEBL1	0.000811371
TREH	0.000811302
NKX2-8	0.000810765
HOXD13	0.000810302
LSG1	0.0008099
POFUT1	0.000809549
SLC6A4	0.000808657
CIART	0.000808656
C5orf34	0.000808427
CASP5	0.000807816
ATXN3L	0.000807675
MEIG1	0.000807544
ZNF514	0.000807126
RMI2	0.000806845
FDPSP2	0.000806801
IL3	0.000806625
P4HA2	0.000805839
ADGRF3	0.000805341
MAGEC2	0.000805051
OIT3	0.000804358
NHLRC2	0.000804222
CCP110	0.000804045
F2RL3	0.000803239
SLC52A3	0.000803175
TLX2	0.000803057
SLC22A14	0.000803033
PCSK2	0.000802859
YPEL4	0.000802752
CPA6	0.00080233
COL22A1	0.0008019
BHLHB9	0.000801838
OMD	0.000801094
PTH	0.000800926
SKAP2	0.000800832
MIPEPP3	0.000800379
KRCC1	0.000799842
TREML1	0.000799521
MSL1	0.000799375
OR51E2	0.000798362
MS4A3	0.000798124
FOLH1B	0.000797842
C10orf53	0.000797804
PRR16	0.000797189
AGO1	0.000796999
C9	0.000796461
TSPEAR	0.000796444
CCDC70	0.000795913
ARHGAP42	0.000795468
HIPK1	0.000795377
WDR72	0.000795108
OR51A1P	0.000794502
CMA1	0.000794427
PLD6	0.000792975
SPATA8	0.000792974
FGF18	0.000792948
ZNF736	0.000792747
EVA1A	0.000792592
SMG9	0.000792278
CBLN1	0.000792172
GAL	0.000792121
C17orf58	0.0007921
RERGL	0.000791259
LRRC19	0.000791048
ZIC3	0.000790724
[truncated: 14,740 more rows]

## Sheet: Supplementary Table 7
Supplementary Table 7. Feature importance analysis for Heart failure case-control classifier.
Gene	SHAP
EYA4	0.00656457
PTCHD4	0.00504644
EDA2R	0.00477595
RANBP17	0.00337938
SLC6A15	0.00310903
GTF2IRD2	0.00310594
ZNF518B	0.00296872
ZNF300P1	0.00280471
EPHA6	0.00272973
LHFPL4	0.00266771
ZMAT3	0.00264541
SEMA3E	0.00260801
CDKN2A	0.00249085
PCDHGB6	0.00219952
ABCB5	0.00215216
GREM2	0.00214917
ECEL1	0.00214242
IFNA7	0.00211115
LRRN3	0.00210903
LMO3	0.00203998
PCDHB3	0.0020016
C2	0.00199963
NEFH	0.0019945
GSTM1	0.00198781
GAS2L2	0.00196091
AWAT1	0.00191795
STK19	0.0019173
CCDC144A	0.00190187
POU3F4	0.00188573
GPR52	0.00186383
CLEC5A	0.00184511
ROBO2	0.00182327
CDH10	0.00179576
EPHA5	0.00177874
MRGPRX2	0.00175062
IGF2BP1	0.00173004
PCDHB2	0.0017289
SELE	0.00170413
TDRD9	0.00167649
MOV10L1	0.00167154
ANKRD55	0.0016685
SYCP1	0.00163567
ZNF208	0.00163223
PLAG1	0.00163045
ASXL3	0.00162303
PYHIN1	0.00162299
LYG2	0.00161384
POMC	0.00157054
CECR7	0.00155343
UTS2B	0.00154381
SPAG6	0.001529
BLID	0.00152723
PCDHB4	0.0015233
KIR3DL3	0.00151048
APLNR	0.00150975
ADORA3	0.00150612
PRM2	0.00149677
UTS2	0.00149529
CSPG4P5	0.001495
IFNK	0.0014871
AOX2P	0.00148684
MKRN3	0.00148625
GUCA1A	0.00148009
MYLK4	0.00147914
TAS2R13	0.00147874
ZNF215	0.00147832
CAPN6	0.00146288
ALX1	0.00146243
EYA2	0.00144438
ADAM3B	0.00143253
CCDC184	0.00142767
PAPPA2	0.00142133
PIEZO2	0.00141892
PRKXP1	0.00140212
CRABP1	0.00140146
PI16	0.00139161
SRY	0.00138512
PDE4A	0.00138081
OTUD7A	0.00136831
DDB2	0.00136744
CBX8	0.00136646
PLXDC1	0.00136087
KRT33A	0.00134436
ZNF93	0.00133894
NOG	0.00132865
CSN3	0.00132497
ZSCAN10	0.00131958
KIRREL2	0.00130938
PRAMEF12	0.00129751
RHD	0.00129672
TP53I11	0.00129591
SPRN	0.00128377
SNTG1	0.00128258
GPR21	0.00127674
CCR4	0.00127432
GFRA3	0.00127287
HSD11B1	0.00127279
GAPT	0.00127275
HLA-DPB2	0.00127147
HTN3	0.00126964
BCORP1	0.00126877
CRYBA1	0.00126765
KDM5D	0.0012587
FBLL1	0.00125595
BMP6	0.0012527
GTF2H2B	0.0012515
OR6A2	0.00124871
SHOX	0.00124404
MDGA1	0.00124371
PRDM7	0.00124281
ADRA2B	0.0012422
CALHM1	0.00124149
WFDC8	0.00123914
TRIM58	0.00123076
PRAME	0.00122512
GDF3	0.00122327
ART5	0.00122297
CFAP57	0.00122018
AIPL1	0.00121645
GSTT2	0.00121629
TSGA13	0.00121596
CD1B	0.00121275
OOEP	0.0012093
DACH2	0.00120784
KCNS1	0.00120627
EMC10	0.00120537
OR5V1	0.00120439
C17orf97	0.00120405
KIF15	0.0012037
DPYSL4	0.00120277
C2orf27A	0.0012005
VENTX	0.0012001
RNF17	0.00119753
FOSB	0.0011972
TAS2R50	0.00119685
ATF7IP2	0.00119612
PRKAR1AP1	0.0011945
KRT71	0.00118531
OSTCP1	0.00118422
ZNF474	0.00118257
RAB9BP1	0.00118122
IGHG1	0.00117697
AEN	0.00117371
PRSS21	0.00117268
OR7E37P	0.00116512
PCDH17	0.00116351
TMEM217	0.00116155
ZNF549	0.00115723
ADAM12	0.00115462
GJD4	0.00115208
CALHM3	0.00114586
FXYD4	0.0011458
SCART1	0.00114566
BEND4	0.0011428
TPBGL	0.00114052
GRAPL	0.00113997
THNSL2	0.00113631
TUBAL3	0.00113522
BRINP1	0.0011328
NKAPL	0.00113254
ZFY	0.00113013
KRTAP3-2	0.0011286
SYCP2L	0.00112613
FOS	0.00112346
XKR6	0.00111696
SCML2	0.00111644
CTSG	0.00111439
UBBP1	0.00111324
C20orf202	0.00110441
PWP2	0.00110326
SYCE1L	0.0011008
LENEP	0.00109873
PRRG3	0.00109772
CES1P1	0.00109444
RORB	0.00109397
SYT15	0.00109233
CLIC2	0.00109209
EQTN	0.00109008
PATE2	0.00108964
FAM118A	0.0010878
ZFP42	0.00108658
JADE2	0.00108566
ZP2	0.00108529
GDF15	0.00108426
CSMD1	0.00108272
L3HYPDH	0.0010821
ZNF75A	0.001081
ACYP1	0.00107996
GPR82	0.0010775
MORC1	0.00107628
AHRR	0.0010759
IL23R	0.00107575
ANXA2P3	0.00107415
REN	0.00107348
REM1	0.00107242
SPINK2	0.00107129
NPPC	0.00107094
ATP23	0.001068
SLC22A13	0.00106603
NT5C1A	0.00106495
DDX11L2	0.00106374
GNRH2	0.00106348
MPP4	0.00106049
TAS2R19	0.00105923
XCL1	0.0010587
AMBN	0.00105828
RP1L1	0.00105674
IL25	0.00105591
CILP2	0.00105402
REG4	0.00105314
SYCE1	0.00105136
PPEF2	0.00105132
CCNYL2	0.00104794
IGSF22	0.00104453
SLC25A2	0.0010429
SPATA31C2	0.00104247
DPPA5	0.00104197
OR51I1	0.00104159
SLC4A10	0.00104121
SLC35G3	0.0010388
NEUROG2	0.00103636
CRYBB3	0.0010338
GLB1L3	0.0010332
NLRP11	0.00103318
LRRC3	0.00103301
FIGN	0.0010327
PRLH	0.00103142
LEXM	0.00102926
ZFR2	0.00102368
NANOG	0.00102069
TENM1	0.00101964
MMP1	0.00101958
CCZ1	0.00101607
SPATA18	0.00101513
SPG21	0.00101143
KRTAP4-1	0.00100737
PSG11	0.00100519
ZNF683	0.00100515
HTRA4	0.00100059
TAS2R41	0.0010005
NAP1L2	0.000997287
OR2J3	0.000996277
USP32P2	0.000995626
BIRC7	0.000993356
NAPRT	0.000991722
BCKDHB	0.000990704
OR8D1	0.000989849
FBLN7	0.000988516
HRK	0.000987441
NPBWR2	0.000987146
RPS16P5	0.000984799
LCN15	0.000983424
LCN10	0.00098108
DDIT4L	0.000979974
OR2B2	0.000978843
TAF1B	0.000978095
SOX14	0.00097771
PLA2G4C	0.000977434
TIFAB	0.000976341
FAM106A	0.000973991
TRIM22	0.000972533
KRTAP5-2	0.000969733
PALD1	0.000968541
LDHC	0.00096797
CEP192	0.00096353
CD69	0.000960865
ZNF682	0.00095956
PSG2	0.000959559
INSL6	0.000959516
ANGPTL4	0.000958796
TMEM190	0.000953837
RBM11	0.000953537
TNMD	0.000953478
SIK1	0.00095301
TNFSF18	0.000950521
FBXW4P1	0.00094907
DNAH11	0.000944931
HTR3A	0.000944891
GPRC5D	0.000942392
LTK	0.000942328
PIWIL2	0.000941878
CYP24A1	0.000940547
CHRNA9	0.000939322
BTF3P12	0.000937368
CXorf58	0.000936805
INTS4P1	0.00093287
OR52D1	0.000932361
GALNTL6	0.000930549
CPB1	0.000930398
C6	0.00093
CYTL1	0.00092977
COL23A1	0.000928179
GPR6	0.000925472
ACKR1	0.000923906
SLC14A1	0.000923047
NOX5	0.000922494
PCDHA5	0.000922366
ODF3	0.000921245
TEX12	0.000919932
SPATA45	0.000919569
IL12RB2	0.000919222
ZNF180	0.000917887
KCNK2	0.000917229
DNLZ	0.00091716
PM20D1	0.000915922
MESP2	0.000915542
ZNF77	0.000914988
OOSP2	0.000914792
KCNG4	0.000912933
MRPS21	0.000912782
ZNF497	0.000912215
CCND2	0.000910117
HSF5	0.000908852
KRTAP3-1	0.000908594
PLA2G7	0.000908516
OR51M1	0.000907689
CYP1A1	0.000907535
ACRV1	0.000907291
PI15	0.000906849
SFRP2	0.000906613
ESM1	0.000906608
PCSK1	0.000906397
FREM3	0.000905967
PCDHB8	0.000904367
PSG3	0.000903835
BPIFB4	0.000903305
PCDHA2	0.000899236
EPHX4	0.000898983
VRTN	0.000898922
SYT3	0.000897215
FMO3	0.000894601
NUP85	0.000894379
SLC43A1	0.000894015
KCNH7	0.000892974
TMEM39B	0.000892717
TDRD5	0.000891525
COLQ	0.000889499
SNX31	0.00088886
KIR2DL3	0.000885689
LHCGR	0.000884318
GLRA1	0.000883946
TRNT1	0.000883927
ICOSLG	0.000883238
ZC2HC1B	0.000881232
GPAT4	0.000881224
KRTAP4-4	0.000879747
VN1R108P	0.000879388
GAST	0.000875
NPAS2	0.00087482
ZIK1	0.000874588
PCDH9	0.000873235
GFRA4	0.000872941
FSCN3	0.000871453
CRYGN	0.000870542
SRP9	0.000870457
NOXO1	0.000869908
AGAP9	0.000869695
LHFPL5	0.000868664
FGD2	0.000867455
CEP128	0.000865971
KCNMB2	0.000865404
NRG2	0.000865007
CER1	0.000864299
GUCA1B	0.000863402
ECHDC3	0.00086295
MMEL1	0.000861567
SLC38A11	0.000860977
LRRC52	0.00085948
SEC14L3	0.000858484
ZNF114	0.000858417
ZNF432	0.000856229
GPR174	0.000855068
C1orf100	0.00085492
TAS2R38	0.000853253
CCDC96	0.000851267
ZNF808	0.000850437
GP5	0.00084878
CORT	0.000848187
ESPNL	0.000847811
FRMD7	0.000845543
ZFP57	0.000845477
IFI44L	0.000844041
COL6A6	0.000841528
TFG	0.000841361
OXGR1	0.000841059
CCNA1	0.000839776
TMEM26	0.000839773
PCDHA10	0.000839498
OR51B6	0.000835635
TSPEAR	0.000834421
OR2C1	0.000834196
HAGHL	0.000833615
OTOF	0.000833325
C17orf78	0.000832288
ZIC2	0.000831205
BEX5	0.000830485
NEFL	0.00082968
ESX1	0.000828794
CCDC181	0.000828438
PRDM12	0.000827649
FKBP1B	0.000827541
LRRC74A	0.000826503
ZNF436	0.000825657
CRLF1	0.000825249
CDRT15	0.000824908
TAL2	0.000823708
KRBOX1	0.000823194
UCHL1	0.000822962
ADAD2	0.000819859
PRDM14	0.000818337
TAS2R16	0.000817332
TMEM253	0.000817242
OPN5	0.000816133
WNT8B	0.000814869
LINGO3	0.00081336
JUND	0.000813192
AQP1	0.000813184
TRPM8	0.000812382
CTCFL	0.000811963
RLN3	0.000811853
TCN1	0.000810701
SEMG2	0.000810434
C6orf15	0.000810073
SH2D6	0.000810031
ZNF732	0.000805919
NDUFA4L2	0.000805759
PRM1	0.000803969
GJA3	0.000803266
CFAP74	0.000803246
ERVV-1	0.000802778
STK32B	0.000802664
NR2E1	0.000802517
WNT8A	0.00080199
HES5	0.000801159
ANGEL2	0.000800958
OMD	0.000800261
THEMIS	0.000800043
ZCCHC13	0.000799402
HBZ	0.000798045
LIN28A	0.000797112
GALR1	0.000796816
ISL1	0.000796742
PHEX	0.000796153
TMSB4Y	0.000795626
GRTP1	0.000795358
NPIPB15	0.000795328
UNC5D	0.000793807
ATP9B	0.000792537
CXCL13	0.000792236
KISS1	0.000791728
SLC22A31	0.000790451
DMBX1	0.000790234
COL19A1	0.00078882
CST11	0.000788818
LRRD1	0.000788678
KLRF1	0.000788558
UPF3B	0.000788504
TPRXL	0.000787954
ACE2	0.000787365
EDDM3B	0.000787189
ZNF556	0.000786701
KRT25	0.000786359
FCGR3B	0.000785753
OR13C4	0.0007854
CALML6	0.000785202
MTNR1B	0.000784657
FAM216B	0.000784241
PCGF1	0.000784008
PNMA2	0.000783479
RFPL3	0.000783379
NMBR	0.000782459
SEMA5A	0.000781855
SIGLEC11	0.000781169
LGALS12	0.000780666
TBX22	0.000778989
IGFN1	0.000778969
TERB1	0.000778949
GLP1R	0.000778784
PKD1L1	0.00077865
SPATS1	0.000778576
CTAG2	0.000777432
AMELX	0.000777235
BSND	0.000777035
PAGE1	0.000776993
LRRC37A2	0.000776435
OPCML	0.000775061
SPATA1	0.000774746
ZNF252P	0.000774545
TFRC	0.000773883
FGF16	0.000773473
CNDP1	0.000773273
CYP46A1	0.000773059
TLE6	0.000772852
IFNA1	0.000772575
TSSK1B	0.000772517
PIANP	0.000771714
FOXD4	0.000771479
TSGA10IP	0.000771473
TGM6	0.000771065
FRG1EP	0.000770943
ANP32D	0.000769759
ARHGAP28	0.000769099
HMX1	0.000768822
ZNF391	0.000768183
ZNF385B	0.000767018
METTL21EP	0.000766594
IL17A	0.000765582
FABP3P2	0.000764533
KIAA0825	0.000763897
CST2	0.000762526
LINGO2	0.000761994
CYP4F8	0.000761911
EN2	0.000761759
CYP3A7-CYP3A51P	0.000761439
FRG1JP	0.000760644
ADAM3A	0.000760526
RTP5	0.000760514
SMIM3	0.000760353
ZNF483	0.000760056
LRRC72	0.000759633
MYO15A	0.000759487
ADAMTS19	0.000759014
SALL3	0.000759013
IGLL1	0.00075822
MILR1	0.000757166
EFCAB10	0.000756954
TULP1	0.000756145
CMA1	0.000754738
APOL2	0.000753297
TMEM200C	0.000752735
MICB	0.000752625
DLL4	0.000752332
TSHZ2	0.000752155
SPAM1	0.000751931
TBX20	0.000749794
POMZP3	0.000748851
USH2A	0.000748637
CAPN12	0.000748235
HCG27	0.000748075
NLRP2B	0.000747125
CACNG3	0.000746775
OSM	0.000746292
ITGAD	0.000745666
C14orf178	0.000744586
FGF23	0.000743446
IL5RA	0.000743332
MARCO	0.000743229
MGAT4C	0.000742905
GAL	0.000742642
NRK	0.000742326
SAG	0.000742192
GPR31	0.000740418
NBPF3	0.000740151
VWDE	0.000739611
CCDC83	0.000739474
PEX6	0.000739265
FAM9C	0.00073873
NACA2	0.000738279
MAS1L	0.000738156
RAD21L1	0.00073771
GABRB1	0.000736871
MALRD1	0.000736636
GLYAT	0.000736239
FAM133A	0.000736232
SMC4	0.000735818
SMDT1	0.000735311
KCNJ1	0.000735276
ACTL7B	0.000735048
KCNV1	0.000734542
BTBD18	0.000734362
R3HDML	0.000733464
POTEKP	0.000732214
OR1F1	0.000731989
C5orf47	0.000731468
MYH15	0.00073112
LHX5	0.000730408
SCN3A	0.000730162
PPEF1	0.000729915
PIGA	0.000728712
PTGER1	0.000728323
SUGT1P3	0.000727764
GPR75	0.00072766
TRPM1	0.000727473
TMEM95	0.000727257
CLDN19	0.000725903
NBPF4	0.000724957
UCP1	0.00072407
DUSP9	0.000724055
OPRD1	0.000724043
ACTG1P17	0.000723832
AQP10	0.0007238
NUP210L	0.000723793
ZNF595	0.000723354
ARHGAP26	0.000722548
ERICH1	0.000721681
PCDHGB8P	0.000720542
GCNT1P1	0.000720044
IGLV1-44	0.000717942
IFITM10	0.00071748
LRRN4	0.000717276
LINC00674	0.000717108
ULBP3	0.00071598
TSACC	0.000715964
ZCCHC12	0.000714707
GRK7	0.000714687
GREB1	0.000714094
CNGA4	0.000713809
NPFFR2	0.000713805
XRRA1	0.000713236
RHBDL3	0.000712973
SSTR4	0.0007121
OR11A1	0.000710983
TXNDC8	0.000710915
RABGGTB	0.000710008
E2F7	0.000708861
PPIL3	0.000708628
PCDHGB7	0.000707866
ZSCAN12P1	0.000707702
ZNF415	0.000707195
OR2A4	0.000706815
ADAMTS20	0.000706766
SLC5A11	0.000706399
PARP15	0.000705698
IQCF6	0.000705379
C4orf45	0.000705273
GUCY2C	0.000704236
EGR4	0.000704128
LOXL4	0.000704069
KRTAP11-1	0.000703001
DNASE1L3	0.000702942
ACSM2A	0.000702621
SCN11A	0.000701677
DGKK	0.000701246
SOX11	0.000700801
FAM43A	0.000700789
ARMC12	0.000700013
PRORY	0.000699164
MCHR1	0.000698575
ERAP2	0.00069824
ZNF311	0.000697731
IMMP1L	0.000697728
CYP3A43	0.000697452
RDM1	0.000696429
SPESP1	0.00069625
DSCR4	0.000696043
SLC13A4	0.000695536
PSKH2	0.000695499
TIPIN	0.000694718
ADGRG6	0.000694413
CLDN20	0.000694225
FGF8	0.00069349
NYAP2	0.000693017
TPD52L1	0.000692773
ASIC5	0.000692507
OR10A4	0.000692017
GABRA6	0.000691748
L3MBTL4	0.000691372
CSF3	0.000691369
ICAM1	0.000691003
NUP210P1	0.000690928
C5orf34	0.000687867
RNF148	0.000687368
ADRA1D	0.000687244
PGBD4	0.00068718
PPBPP2	0.000686189
C6orf58	0.000685533
TRHDE	0.000685121
GAGE1	0.000684965
TMEM31	0.000684618
ZDHHC11	0.000683983
ATG10	0.000683808
CXCL10	0.000683474
LDHAL6B	0.00068323
ANP32C	0.000682918
SPIC	0.000682813
TMEM196	0.000682717
IFNA17	0.000682554
CT62	0.000681666
CBLN3	0.000680921
LYZL6	0.00068085
LCNL1	0.000680477
GPAT2	0.000680111
ENTPD2	0.000679864
CT55	0.000679796
L1TD1	0.000679414
PRR16	0.000679244
GRM6	0.000678653
KRTAP1-3	0.000678504
KCNE2	0.000678481
FATE1	0.000678185
NANOS2	0.000677349
FGF18	0.000677269
APIP	0.000676719
ZNF418	0.000676229
PMCHL2	0.000676209
TPT1P8	0.000676112
LY6K	0.000676041
SPATC1L	0.000675701
TEX33	0.000675678
MGAT4EP	0.000675046
PRB4	0.000674949
IL10	0.000673943
ATP4B	0.000673876
MPL	0.000673747
IL17F	0.000673142
SPDYA	0.000672986
GDPD1	0.000672707
CRX	0.000672511
SHOX2	0.000672182
AIRE	0.000672065
TNFRSF9	0.000671628
HES7	0.000671558
BPIFB6	0.000670981
GUCY1B2	0.000669875
PSG9	0.000669743
FLYWCH1	0.000669405
PCDHB9	0.000669198
RNF151	0.000668766
TRIM59	0.000668567
SYT16	0.000668536
ADCY10	0.000668446
CLCA3P	0.000668372
WFDC10A	0.000668074
CNR1	0.000667835
CYP2A7	0.000667695
SIGLEC7	0.000667259
CELA2B	0.000667186
OR51B2	0.000667128
FIGLA	0.00066641
VSX1	0.000666092
GBAP1	0.000666039
AXDND1	0.000665472
HMGN2P46	0.000665261
SMAD6	0.000665167
WDR97	0.00066477
CHIT1	0.000663568
FGF3	0.000663556
GTSF1L	0.000662207
PAOX	0.000662163
LRRC63	0.00066214
HMHB1	0.000662087
CUZD1	0.00066184
WFDC11	0.00066176
COL10A1	0.000661741
FAM20C	0.000660803
MIPEPP3	0.000660245
SESN3	0.000659631
ZNF514	0.000659353
EVA1A	0.000658451
CLYBL	0.000658321
MMP24	0.000657969
GNG13	0.000657644
VWC2	0.000657596
CIR1	0.000657309
LHX4	0.000656905
FAM90A1	0.000656524
NYX	0.000656249
BCO1	0.000656072
SLC7A13	0.000655956
NPY6R	0.000655481
TMEM235	0.000654648
EPO	0.000654186
LDHAL6A	0.00065408
RD3	0.000653934
MRPS6	0.000653615
HUS1B	0.000653535
SOX3	0.000652044
SPATA3	0.00065175
TMPRSS12	0.000651705
RXFP1	0.000650733
ANKRD36BP2	0.00065072
GPR27	0.000650529
CTNND2	0.000650494
IL21R	0.000649885
ZNF29P	0.000649871
CCDC87	0.000649136
HSPA6	0.000648645
IBSP	0.000648201
SLC25A31	0.000647999
FAM162B	0.000647954
GFRA2	0.00064752
ADM5	0.00064703
KRTAP4-3	0.000646667
CXCL14	0.000646162
IFNA21	0.000645932
CSN2	0.00064552
KHDC3L	0.000645483
SCN10A	0.000645198
VWA1	0.000644943
CCDC174	0.000644801
SLC27A6	0.000644723
LIPJ	0.000644519
PTPRD	0.000644365
ASCC3	0.000644087
SHC1P1	0.000643872
PDPR	0.000643585
FDXR	0.000643515
POU2F3	0.000642951
RPP25	0.000642886
RHO	0.000641963
SMIM17	0.00064087
ACVR2B	0.000640763
GALNT13	0.000640684
MAGOH2P	0.000640417
FSHB	0.000640385
CREB5	0.000640248
MMP27	0.000639793
OR2S2	0.000639185
SPATA22	0.000638896
OR51B5	0.000638585
PHOSPHO2	0.00063855
ANKRD20A11P	0.000638454
GPR62	0.000638288
FNDC7	0.000637264
SYCE3	0.000636761
STUM	0.000635783
NEFM	0.000635563
CCDC144CP	0.000635298
ZG16B	0.0006352
TSC22D3	0.000634313
ANXA10	0.000634106
CADM3	0.000633374
VN1R1	0.000633155
GLI4	0.000632931
IFNW1	0.000632908
AMER2	0.000632783
GUCY2D	0.000632749
TBR1	0.000632607
GPR17	0.000632388
GABRA4	0.000631783
FGF20	0.000631739
ZNF229	0.000630792
CTAGE11P	0.00063073
NBEAP1	0.000630406
NAGS	0.000629759
TPTE2P6	0.000629748
OR2M4	0.000629387
IRGQ	0.000629035
UXS1	0.000629015
RPGRIP1	0.000628441
SEC1P	0.000628357
AATF	0.000628274
FAM217A	0.000628269
HSD17B14	0.000628251
TNFSF9	0.000627774
FRMD8P1	0.000627088
AANAT	0.000626717
TIGD3	0.00062621
C3orf14	0.00062569
TMEM255A	0.000625569
SPRR4	0.000624914
RHAG	0.00062457
WDR38	0.000623772
OR7A5	0.000623676
HEATR9	0.000623255
ZPBP2	0.000623226
MCOLN3	0.000623201
CFC1B	0.00062253
DAZL	0.000622018
ALMS1P1	0.000621748
PKDREJ	0.000621605
TSPYL6	0.000621224
TIGD6	0.000621033
FRG2EP	0.000620845
POLR2J2	0.000620676
SLC6A2	0.000620334
KRTAP5-8	0.000620264
CHRNB3	0.000619864
CPNE7	0.000618421
BARX1	0.000618393
SALL4	0.000617575
KIAA1210	0.000616675
RRN3P2	0.000616564
MIXL1	0.000616367
SP5	0.000616333
GTF2IRD2B	0.00061613
SLC25A44	0.000616013
VMO1	0.000615466
CCDC182	0.000615433
CLEC11A	0.000615288
TM4SF1	0.000614994
TGIF1	0.000614868
CLEC4F	0.00061462
NLRP3	0.000614376
SORCS2	0.000614002
IRGC	0.00061387
UBE2DNL	0.000612941
ATP6V1G3	0.000612835
GPR153	0.000612488
KLRG1	0.000611998
KCNAB3	0.00061188
ZPLD1	0.000610877
CHPF	0.000610854
SULF2	0.000610479
UGT2B28	0.000609463
CYSLTR2	0.000609276
CIB3	0.000608809
ARMC10	0.000608608
SPEM1	0.000608437
DEFB124	0.000608383
WDR72	0.000608357
FSCN2	0.000607494
ZNF506	0.000607255
IGFBP1	0.000607064
DAAM2	0.00060703
GNB1L	0.000606278
S100A7A	0.000606245
ASCL3	0.000606203
COL21A1	0.000606199
TNFRSF17	0.000606085
RHOXF1	0.000605881
TSPYL2	0.000605452
VN1R5	0.000605384
MCM10	0.000605301
PMCH	0.000604946
CLEC4M	0.00060482
SMCO3	0.000604156
ZNF23	0.00060382
CFHR3	0.000603324
PRSS54	0.000602561
COL20A1	0.00060245
TAS2R10	0.000602132
LCN8	0.000601983
LYSMD2	0.00060133
DSCR8	0.000600635
WIF1	0.000600632
VGF	0.000600626
CORIN	0.000600167
RNF19A	0.000600027
CRYBB2	0.000599831
FAM170B	0.000599512
OR1A2	0.000599042
LIPI	0.000598179
MBNL3	0.00059709
KLHDC7B	0.000595643
DDX53	0.000595298
MLN	0.000595128
SCIN	0.000594982
CLDN23	0.000594766
ZIM3	0.000594646
NXF3	0.000594612
LCN1	0.000594596
OR1G1	0.000593879
PKNOX2	0.000593828
TTC41P	0.000593308
ABCA11P	0.000593244
DLX2	0.000593143
HPSE2	0.000593021
MMP8	0.000592924
EFNA2	0.000592755
GPR107	0.000592569
RFX4	0.000592284
GRM3	0.000592223
NOTUM	0.00059197
TMEM62	0.000591083
HBE1	0.000590945
GZMK	0.000590549
C7orf31	0.000590405
SLC45A2	0.000590319
IFNA2	0.000588953
ANXA2P1	0.000588781
HLA-G	0.000588775
KRTAP19-1	0.00058847
TGM4	0.000588149
TBC1D28	0.000588105
GPR50	0.000587943
SLC6A3	0.000587784
REC114	0.000587186
CNGB3	0.000586824
TRBV16	0.000586029
GTF2B	0.000585595
SLC7A3	0.000585589
ZNF675	0.000585226
HPDL	0.000584767
DNASE2B	0.000584708
ZNF705G	0.000584313
C7orf57	0.000584269
GJD3	0.000584182
ZP1	0.000583482
SMCP	0.000583395
SIAH3	0.000583322
OBP2A	0.000583308
SEMG1	0.000583025
PDGFRB	0.000582186
UBE2U	0.000582008
SLC25A41	0.00058182
PER2	0.000581138
IGFALS	0.000580967
CUX2	0.000580948
GNGT1	0.000580827
GPR55	0.000580537
OR8G1	0.00058047
TBRG1	0.000580111
OR3A3	0.00057974
DAOA	0.000579618
PRG4	0.000579442
SATB2	0.000579382
EPHB2	0.000578964
C9orf131	0.000578361
DRICH1	0.000577771
PSG6	0.000577526
CRYBA4	0.000577266
LTA	0.000577199
CNOT4	0.000576736
TACR3	0.000576688
WBP1L	0.000576531
RPS2P45	0.000576504
PRDM15	0.000576231
SLC22A2	0.000576166
TYMS	0.000576159
SLC12A5	0.000576029
FEZF2	0.000575824
ERCC6L	0.00057579
NXNL2	0.000575291
ARHGAP22	0.000575261
HRH4	0.000574886
C3orf36	0.00057478
CHD3	0.00057429
COL28A1	0.000574175
LCMT2	0.000574146
C10orf62	0.000573979
VPS16	0.000573917
MUC3A	0.000573706
MANEAL	0.000573494
CLVS2	0.000573409
RNF212B	0.000572878
DMRT1	0.000572832
DMRTA1	0.000572354
SLC2A6	0.000571969
CDKN1A	0.00057154
ACTBP9	0.000571204
CLIC1P1	0.000571048
RNF114	0.000570992
CCDC154	0.000570354
OVOL3	0.000570287
NAA11	0.000569893
PLD6	0.00056985
CNBD1	0.000569207
NAALADL1	0.000569118
TMEM61	0.000568426
FUT11	0.000568281
PURG	0.000568279
ZNF589	0.000568218
CHST7	0.000567854
LPA	0.000566342
FFAR1	0.000566288
ADAMTS4	0.000566184
A4GNT	0.000565138
OR2B6	0.000565009
DLL3	0.000564365
SLC22A1	0.000564175
ZNF223	0.000563717
TRIM64EP	0.000563276
PTH	0.000563095
MIER2	0.000562128
TBC1D10A	0.000561376
KCNK16	0.000560949
PAGE5	0.0005605
MFAP5	0.000560025
EDA	0.000559807
TM4SF18	0.000559388
ZNF541	0.000559336
HES4	0.000558926
NRIP1	0.00055878
C3orf22	0.000558357
MFSD14C	0.000558344
HMGB3	0.000557252
SSX1	0.00055723
COG4	0.000556519
TVP23B	0.000556496
KRT75	0.000556324
PCDHGA10	0.000556241
DMP1	0.000555883
PRB1	0.000555825
PHOSPHO1	0.000555787
SLIT1	0.000555336
OR7A10	0.000554865
PLAT	0.000554258
ESR1	0.000554246
NOL4	0.000553866
PCDHB16	0.000553865
FAM221B	0.000553857
GRM5	0.00055329
SSMEM1	0.000552823
NLRP9	0.000552695
NKAP	0.000552564
SLAMF9	0.000551307
HADHAP1	0.000550973
TLX2	0.000550922
TTR	0.000550756
GPHA2	0.000550459
MYCN	0.000550396
DIRAS3	0.000549647
CNPY1	0.000549447
OR3A2	0.000549442
NRG3	0.000549378
CCL26	0.000548901
FGG	0.000548571
ZNF813	0.000548564
SHCBP1L	0.000547905
USH1C	0.000547797
MSLN	0.000547422
RBM45	0.00054695
AIM2	0.00054638
RIPPLY3	0.000545661
CACNG5	0.000545356
MUC16	0.000545092
ZNF440	0.000544957
CCDC172	0.000544515
PENK	0.000543171
GJC2	0.000542399
IZUMO2	0.000542346
DCAKD	0.000542148
SLC22A24	0.000542058
DCT	0.000541869
CA5A	0.000541855
RCAN1	0.000541537
C10orf53	0.0005413
IRS4	0.000541298
XKR4	0.000541115
APOF	0.000540893
NTNG2	0.000540845
TPSD1	0.000540844
TBCD	0.000540836
HS2ST1	0.00054048
MMP10	0.000540129
PREX2	0.00053993
CCT8	0.000539895
ZNF274	0.000539398
GXYLT2	0.000539358
KHDC1L	0.000538939
GPHB5	0.000538759
OR5P2	0.000538679
TADA3	0.000537999
NR4A2	0.000537898
RFPL1	0.000537884
KCNA1	0.000537704
CA5B	0.000537487
COMP	0.000537235
FIBCD1	0.000536549
PTH2	0.000536504
HLA-DPA2	0.000535978
OCM2	0.000535743
GLYATL2	0.000535529
KRTAP7-1	0.000535446
IL1RAPL1	0.000535364
EIF1AY	0.000534739
OTP	0.000534609
ZNF254	0.000534545
C5orf46	0.00053452
ZSCAN1	0.00053431
PDE6B	0.00053419
CAGE1	0.000533817
ZNF629	0.000533591
PLSCR2	0.00053337
ZAR1	0.000533285
SLC47A2	0.000533222
S100Z	0.000533161
TRH	0.000533033
KRT40	0.000532928
DEFB119	0.000532811
ARR3	0.000532524
TMCO2	0.000532484
PVALB	0.000532368
MIF	0.000532234
FAM9B	0.000532137
MCM8	0.000531894
PPP1R10	0.000531572
ELK2AP	0.000531483
RGMB	0.00053133
ISM1	0.000531256
TEKT2	0.000530378
CYLC1	0.000530355
MS4A5	0.000530299
DIO3	0.000529582
ALPP	0.000529513
SPSB1	0.000529405
SLC22A3	0.000528966
POM121L2	0.000528873
HBB	0.000528854
VN1R2	0.00052878
ALLC	0.000528635
ZNF560	0.000528295
UBE2Q2L	0.000527928
KCNA10	0.000527894
MTO1	0.000527544
PCDHA9	0.00052747
TERF2IP	0.000527321
PLCZ1	0.000527301
C12orf40	0.000526923
TSPO2	0.000526835
SERTM1	0.000526428
FOXR1	0.000526239
LCT	0.000526167
CROCCP2	0.000526005
MAP3K19	0.000525577
SLC16A11	0.000525121
ANKRD33	0.000524644
HDGFL1	0.000524644
PASD1	0.000524573
C3orf49	0.000524454
APLN	0.000523985
ACKR4	0.000523543
SOCS2	0.000522818
FRZB	0.000521749
ZRSR2	0.000521637
SEC31B	0.000521317
SPINK13	0.000521044
SLC7A9	0.000520939
SMLR1	0.000520931
ATP6V1E2	0.000520871
NLRP5	0.000520616
S100G	0.000520567
LRRC10B	0.00052002
ACOT4	0.000519982
PROKR2	0.000519632
PIGS	0.000518901
RPA3	0.000518521
TERB2	0.000518365
PPY2P	0.000518295
TIGD4	0.000518192
ERI2	0.000517866
PSMG4	0.000517145
GPR101	0.000516961
SUMO4	0.000516804
UCMA	0.000516714
KRT17P5	0.000516618
CXCL9	0.000516468
EFCAB13	0.000516443
IL9	0.000516352
CCT8L2	0.000516258
ZNF157	0.000515937
FAM169B	0.00051582
PDZD9	0.00051567
AADACL2	0.000515475
C2orf50	0.000515444
OXT	0.00051537
CDK15	0.000515116
KLRD1	0.000514963
MOS	0.00051455
OR51B4	0.000514226
SLFN13	0.000514138
EID3	0.00051392
SGCG	0.000513914
SLC41A1	0.000513861
ANXA2R	0.000513794
DMRTC2	0.000513773
FOLH1B	0.000513672
MEGF10	0.000513647
MC2R	0.000513532
TSPAN10	0.000513272
SSTR1	0.000513134
LMNTD1	0.000513074
SLC16A8	0.000512871
TUBB1	0.000512652
DNAJB7	0.000512252
TCL1B	0.000511989
MYH2	0.000511973
MROH2A	0.00051123
MEGF6	0.00051104
IGDCC4	0.000511021
TXNL4B	0.000510998
FCRLB	0.0005107
RLN2	0.000510658
MTNR1A	0.000510285
TIMP3	0.000510223
PCGF5	0.000510201
HSF2BP	0.000510109
RSPO4	0.000509595
TTC9B	0.000509476
GALP	0.000509388
MEP1B	0.000509306
ERC2	0.000509058
THADA	0.000508901
HSD17B12	0.000508837
ARL16	0.000508751
EIF4A2	0.00050865
MGA	0.000508388
CCL22	0.000508117
LUZP4	0.000507908
INSM1	0.000507829
MBTPS1	0.00050777
NUMBL	0.000507707
ZPBP	0.000507703
C11orf16	0.000507471
GCNT7	0.0005072
IRGM	0.00050711
FOXB1	0.00050682
GUSBP1	0.000506452
CLIC6	0.000506093
RSAD1	0.000505857
APOL5	0.000505226
RET	0.000505179
GUCY2F	0.000505158
TRIB3	0.000504997
RSAD2	0.000504728
MC3R	0.000504631
SSTR5	0.000503692
PMS2P5	0.000503246
TMEM52	0.000503237
KRTAP10-11	0.000503044
ADH4	0.000503003
IGKV1OR2-118	0.000502487
DIRAS2	0.000502482
IFNA8	0.000502342
COL2A1	0.000502249
CNBD2	0.000502183
DEFB125	0.000502146
KRT37	0.000502114
CDYL	0.0005021
GAA	0.000502098
IFNB1	0.000501791
OR7A17	0.000501634
KLRC3	0.000501613
RRM2B	0.000501306
GALR3	0.000501027
F8	0.000500819
SERPINE1	0.000500817
KCNG3	0.000500764
STC1	0.000500741
TAAR2	0.000500582
KRTAP4-2	0.000500053
GH1	0.000499984
HTR1D	0.000499971
ERN2	0.00049997
BEND2	0.000499548
IL21	0.000499256
OLFM2	0.000498988
SPP1	0.000498899
CALR3	0.000498519
CLHC1	0.000497996
ARHGAP42	0.000497562
WNT16	0.00049728
ANKRD22	0.000496548
COL11A1	0.000496207
CYB5D1	0.000496176
NPLOC4	0.000495877
NEB	0.000495601
PITRM1	0.000495144
ADAM21	0.000494358
CCL1	0.000493942
FMR1NB	0.000493326
ZNF835	0.000492333
STIP1	0.000492309
AHSG	0.00049218
LRGUK	0.000492172
THAP2	0.000492117
KRTDAP	0.000492074
U2AF1	0.000492027
NTN5	0.000491936
SKAP2	0.000491629
CTHRC1	0.000491571
TNFRSF10D	0.000491484
HNRNPA0	0.000491461
GTPBP6	0.000491271
NEUROD4	0.000491159
MYLIP	0.000491144
MMP13	0.000491064
PHYHD1	0.000490866
CXXC4	0.000490543
MACROD2	0.000490468
IGHD	0.000490161
ASIP	0.000489839
MAP1LC3C	0.000489688
TAF1L	0.00048958
ZNF781	0.000489227
ADGRA2	0.000489128
TEX13B	0.000489094
TAF1D	0.000488492
GAL3ST4	0.000488152
CECR2	0.00048804
PKD2L2	0.000488009
WDR25	0.00048787
HCRT	0.000487422
IL22	0.000487127
RFESD	0.000486547
DPEP3	0.000486511
KRTAP13-1	0.000486449
SIRPD	0.00048608
POM121L10P	0.000485117
POU5F2	0.000484715
WDR64	0.000484604
SVOPL	0.000484279
GAPDHS	0.000484099
CPNE1	0.000484057
ALX3	0.000483726
PAXIP1	0.000483619
UBBP2	0.000483595
USP26	0.000483444
SIX3	0.000483312
TTLL10	0.000483195
F2RL3	0.000482928
MT1H	0.00048213
KLKB1	0.000482056
IGDCC3	0.00048176
HTR2B	0.000481277
UBE2NL	0.000481037
MEIG1	0.000480627
DPY19L1P1	0.000480282
MRGPRX4	0.000480239
BMP5	0.000479852
TECTB	0.000479745
IGHV3-75	0.000479447
GHRH	0.000479398
FHIT	0.000479051
CDC20B	0.00047897
LELP1	0.000478943
LZIC	0.000478911
PPP3R2	0.000478887
BNC1	0.000478725
CIB2	0.000478581
TULP2	0.000478346
MAGEC1	0.000478239
GPX5	0.00047798
RYR3	0.000477803
PMS2P2	0.000477679
KLHL14	0.000477128
POU4F3	0.000477043
LOXHD1	0.000476978
ATXN3L	0.000476814
HTR2C	0.000476798
TMIGD2	0.000476716
TDRD3	0.000476293
DBIL5P2	0.000476233
MDGA2	0.000476222
MOG	0.000476033
WNT9B	0.000475986
LMO7DN	0.000475717
CALB1	0.000475406
TECRL	0.000475068
SERPINA2	0.000475068
JAKMIP1	0.00047484
VSIG1	0.000474736
MAT1A	0.000474564
FDFT1	0.000474532
C11orf87	0.000474093
HCN1	0.000474007
SLC12A4	0.000473691
C1orf167	0.00047272
CBLN1	0.000472318
ERVFRD-1	0.000472251
AKAP10	0.000471852
TEX14	0.000471754
SEMA4F	0.000471607
GUSBP5	0.000471539
PRR18	0.000471244
PDC	0.000471203
PRR9	0.000470825
DNMT3L	0.000470645
ANKUB1	0.000470518
VILL	0.000469783
ZNF593	0.000469515
SHISA2	0.000469203
CIB4	0.000469159
DPPA2	0.000468984
IAPP	0.000468827
BLK	0.000468774
GHRL	0.000468625
TAS2R7	0.000468559
C2CD4B	0.000468329
RANGRF	0.00046785
PRL	0.000467299
POU6F2	0.000467009
TRPC3	0.000466924
BTN2A2	0.00046642
GKN1	0.000466362
SCGB3A1	0.000465928
ARNTL	0.00046583
CDC42EP4	0.000465285
XPNPEP2	0.000465245
BPIFA4P	0.000465209
PAPOLB	0.000465174
SP1	0.000465037
CATSPER3	0.000464896
NPPA	0.000464644
CCDC33	0.000464413
PRSS16	0.000464327
CFAP99	0.00046396
C17orf98	0.000463877
TMC2	0.000463645
PRR34	0.000463588
CD248	0.00046346
PRSS33	0.000463269
C11orf94	0.000462995
ADAMTSL1	0.000462448
C22orf15	0.000462402
KCNJ6	0.000461997
ZNF442	0.000461406
IL2RA	0.000461242
NPHS2	0.000460488
KCNRG	0.000460419
LIF	0.000460383
ZBTB32	0.000460143
TSPY1	0.000459825
RGS13	0.000459815
ACSBG2	0.000459759
CFAP161	0.000459628
ACTR3C	0.00045962
CCDC17	0.000459566
CLK1	0.000459491
OR1I1	0.00045936
U2AF1L4	0.000459048
CLCN1	0.000458886
OR2L1P	0.000458829
TLL2	0.000458559
SLC9A2	0.000458474
CETP	0.00045827
PCDH11X	0.000458192
GCM1	0.000458091
TAS2R40	0.000457762
DDX4	0.000457714
GCNT4	0.00045763
HYAL1	0.00045738
DDX11	0.000457266
ADAM20	0.000457201
CALCR	0.000457098
GBP6	0.000456999
LGALS14	0.000456773
CREB3L4	0.000456576
VWA8	0.000456372
LRRC37A5P	0.00045553
SLCO6A1	0.000455283
CANT1	0.000455043
FRG1HP	0.000454137
BTN1A1	0.000454054
CYP2A7P1	0.000453942
NTRK1	0.000453935
SCGB3A2	0.000453875
KRTAP4-12	0.000453832
ZNF284	0.000453406
HLA-DRB6	0.000452901
C19orf81	0.000452634
SLC25A35	0.000452418
PSMA8	0.000452025
MRPL52	0.000451992
SAGE1	0.000451345
PCP4L1	0.000451237
LINGO1	0.000451206
TDRD1	0.000451144
PRPS1L1	0.000450502
NTN3	0.000450429
SOCS1	0.000450174
SPATC1	0.000450138
KCNH1	0.000449923
CHORDC1	0.000449635
TDO2	0.000448836
FLT3	0.000448696
TSPAN16	0.000448476
IL3	0.000448399
OR1D5	0.000448234
FRG1BP	0.000448022
MLXIPL	0.000447782
OR10D1P	0.000447514
DUSP5P1	0.00044745
KMO	0.000447435
KISS1R	0.000447152
ADCY10P1	0.000446735
MAGEA4	0.000446365
C7orf33	0.000446323
PTPRT	0.00044596
PSRC1	0.000445941
FBXL13	0.000445603
CRISPLD1	0.000445436
TFCP2L1	0.000445392
STK32A	0.000445322
ASTN2	0.000445208
CHRNA3	0.000444671
BTNL2	0.000444375
ZSWIM2	0.000444274
CCL18	0.000444022
SLC17A6	0.000443992
CDX4	0.000443778
GABRD	0.000443504
CRYGS	0.000443496
F7	0.000443477
ESRRB	0.000442529
CLEC12A	0.000442338
FCRL3	0.000442223
ACOT6	0.000442111
HSPB9	0.000441774
NKX2-8	0.000441731
GLS2	0.00044172
ALPL	0.000441674
WFDC9	0.00044159
DSCC1	0.000441455
TRIM37	0.000441199
NCOA7	0.000440893
PAX1	0.000440856
SP7	0.000440811
KCNG1	0.000440576
FAM187B	0.000440289
ULBP2	0.000440031
PNLDC1	0.000440004
IMPG1	0.000439952
TUBA8	0.00043977
BARHL1	0.000439754
COL22A1	0.00043971
INSRR	0.000439543
FKBP6	0.000439406
HACE1	0.00043931
BORCS8	0.000438671
ZNF133	0.00043837
FAM170A	0.000438331
KLK13	0.000438275
DEXI	0.000438084
EXO5	0.000437862
ADAMTSL2	0.000437559
KRTAP5-9	0.00043684
SYT6	0.000436189
SDCBPP2	0.00043611
CEP104	0.000436076
INSM2	0.000435692
GPR15	0.000435615
OR51E2	0.000435396
TMEM145	0.000435253
GBX2	0.000434997
FOXD1	0.000434988
TMPRSS11D	0.000434846
SLC10A1	0.000434723
DPP3	0.000434568
CLEC4C	0.000434452
RNASE7	0.00043429
GOLGA6A	0.000434201
DSTYK	0.000434066
OTOR	0.000433974
VCX2	0.000433793
AKAP3	0.000433788
FAM205BP	0.000433189
C7orf77	0.000433043
SLC25A26	0.000432923
KIR2DL1	0.000432545
CCDC97	0.000432488
OR2C3	0.000432385
C20orf173	0.000432066
PKD2L1	0.000432041
SLC28A1	0.000431916
METTL18	0.000431877
NRTN	0.000431694
NGEF	0.000431415
POU4F2	0.000431271
IFNA5	0.000431211
OR4D1	0.000431151
PHLDA1	0.000431035
HHIPL2	0.000431024
TRDV3	0.000430779
CDKN2C	0.000430355
FBXO43	0.000430025
PGK2	0.00042986
VLDLR	0.000429572
PPIEL	0.000429542
IMPG2	0.000429525
LRTM1	0.000429295
ZNF2	0.000429181
TMEM222	0.000429032
TIGAR	0.000428996
ZBED1	0.000428946
GPIHBP1	0.000428922
OR5J2	0.000428578
KCNK4	0.000428351
TTC36	0.000428229
HCN4	0.000428109
RTP4	0.0004278
CCL7	0.000427672
E2F8	0.00042754
OBSCN	0.000427434
KRTAP4-11	0.000427431
CHI3L1	0.000427412
CLEC3A	0.000427329
HCG22	0.0004266
AQP2	0.00042653
FBXL8	0.000426521
PROSER3	0.000426479
MMP16	0.000426064
DEFB127	0.000426037
GABRB2	0.000425647
MSX1	0.000424839
SRSF3	0.00042481
KRTAP9-4	0.00042386
GOT1L1	0.000423364
TCAM1P	0.000422995
PLPPR5	0.000422456
SCGB1A1	0.000422338
GPCPD1	0.000422307
NFKBIA	0.000422173
SPATA8	0.000422136
PMS2P3	0.000422126
TRIM47	0.000421716
RETN	0.000421312
MC5R	0.00042114
H6PD	0.000421067
CPN1	0.000421065
TRPC2	0.000421042
MAEL	0.00042093
MYL10	0.000420906
GRM2	0.000420846
ARL15	0.000420844
ATXN1	0.000420778
ZNF154	0.000420507
HCAR1	0.000420294
HERC2P7	0.00042
SMIM21	0.000419725
RP1	0.000419628
ADCK2	0.000419187
RSBN1L	0.000418949
THAP3	0.000418773
KLF2	0.0004185
CLEC1A	0.000418457
KRTAP2-1	0.000418399
MRLN	0.000418069
DYNLRB2	0.000417785
IGKV1OR2-108	0.000417742
SREBF1	0.000417497
TEKT5	0.000417497
UBQLN3	0.000417465
GCM2	0.000417061
PRPH	0.000417036
RNF144B	0.000416766
RBM3	0.000416552
TYRO3P	0.000416414
HSD17B7P2	0.00041632
PTCHD1	0.000416213
TTLL2	0.000416094
ACADL	0.000416039
ADGRB2	0.000415551
RPS4Y1	0.000415313
OR10A5	0.000415093
BHLHE41	0.000414344
OR7E24	0.000414155
MYOC	0.000413995
ACMSD	0.000413752
LPAR4	0.000413444
FAM124B	0.000413305
SFTPB	0.000413107
SPACA7	0.000413098
CABP2	0.000413059
KRT38	0.000412901
DTHD1	0.000412612
SHISA8	0.000412531
FCRL4	0.000412491
ENPP7	0.000412307
GZF1	0.000412134
CRELD1	0.000412039
KRTAP4-8	0.000412018
SND1	0.000412013
CXCR3	0.000411827
PCDHAC2	0.000411767
ZSCAN32	0.00041161
STXBP5	0.000411534
ATP6AP1L	0.000411276
RSPH4A	0.00041127
OR51A1P	0.000411261
CHRNE	0.000411255
FOXE3	0.000411156
STAB2	0.000411094
KRT33B	0.000411068
RERG	0.000411037
CXCL17	0.000410356
MPV17L2	0.000410164
ZNF404	0.000409565
FAM205A	0.000409204
LGI3	0.000409037
NKAIN3	0.000408913
NANOS3	0.000408673
SLC12A1	0.000408461
KRT84	0.000408253
RIMBP2	0.000408125
BFSP2	0.000407592
PHF10	0.000407338
ACHE	0.000407032
KRT81	0.000406942
C2CD4A	0.000406785
IL5	0.000406724
TNNI3	0.000406407
TEDDM1	0.000406244
PSG7	0.000406237
VPREB3	0.000406146
SIGLEC8	0.000405729
ATP6V1C1	0.000405698
ADAM30	0.000405028
CALCB	0.000405027
DSPP	0.000404927
CYMP	0.00040481
SLC12A2	0.000404657
TUBB7P	0.000404602
SSX3	0.000404591
RGS8	0.000404482
STARD6	0.000404467
OR7E2P	0.000404184
TSSK6	0.000403889
ST6GALNAC1	0.000403514
REG1CP	0.000403472
OXCT2	0.000403228
C2orf73	0.000403225
FGF5	0.000402972
CASP5	0.000402894
TMPRSS15	0.000402801
SPATS2	0.000402686
PNLIP	0.00040211
ABCG8	0.000402037
RP9	0.000401841
SLC17A8	0.000401574
SPSB2	0.000401434
SHISA3	0.000401029
TDRD12	0.000400987
MRPL23	0.000400982
AKNAD1	0.000400938
CBY3	0.000400806
GNG3	0.000400791
GRIK1	0.00040018
ANKRD26P3	0.000400129
ST8SIA2	0.000400114
ZFP82	0.000400054
COLEC11	0.000399744
ZNF550	0.00039961
B3GLCT	0.000399391
CDC14C	0.000399287
SLC1A7	0.000399109
FABP7	0.000399106
NME8	0.000399081
MED15P9	0.000398953
ZSCAN22	0.000398134
VSTM2A	0.000398055
CLRN1	0.000397808
PRKCG	0.000397727
AREL1	0.000397712
ADRA2C	0.000397596
CBLN2	0.000397503
KIAA0586	0.000397134
SPIDR	0.000396847
TAS2R8	0.000396742
C17orf58	0.000396713
CIART	0.000396243
PTH1R	0.000396198
DLEU7	0.000395918
OR1A1	0.000395834
SPATA12	0.000395596
HTR3C	0.000395547
C11orf97	0.000395345
FBP2	0.000395092
TBC1D7	0.000395004
POTEM	0.000394468
SP3P	0.000394458
COX8C	0.000394372
CCR8	0.000394286
WDR87	0.000394118
PP2D1	0.000393783
ENPP3	0.000393722
DPM3	0.000393719
APOBEC4	0.000393356
BEGAIN	0.000393236
OSBPL6	0.000392791
NT5E	0.000392754
BRDT	0.000392676
KRTAP9-9	0.000392343
CR1L	0.000392306
GRIA1	0.000392236
NUTM2B	0.000392039
BPIFB1	0.000391899
NPTX2	0.000391742
ADA	0.000391724
FAM166A	0.000391447
TRIM42	0.000391445
RRM2	0.000391234
TRAV12-2	0.000391145
C16orf95	0.000391038
OLFML1	0.000390782
FABP2	0.000390709
RRH	0.000390621
GHRHR	0.000390601
ZNF257	0.000390383
TEX11	0.000390296
MCF2	0.00039028
MMP11	0.000390018
RAB40AL	0.000389973
ZNF492	0.000389776
PCK1	0.000389508
TMEM37	0.000389393
THBS4	0.000389308
PTHLH	0.000389235
TAS2R3	0.000389221
STPG2	0.000389161
FAM163B	0.000388916
TEX19	0.00038879
ZNF782	0.000388783
B3GALT1	0.000388506
CABLES2	0.000388268
ARL6IP4	0.000388221
SAXO1	0.000388094
GLG1	0.000387949
RERGL	0.000387874
SOHLH2	0.000387668
PDCD6	0.000387653
HIPK1	0.000387373
CREG2	0.000387227
TOX2	0.000386979
TEX28	0.000386868
BTF3P13	0.00038684
P2RX3	0.000386716
CBX5	0.000386693
UPK1B	0.000386635
PCDHB14	0.000386596
NMUR2	0.000386524
GAL3ST2	0.000386341
OR10H1	0.000386211
DNMT3B	0.00038604
ROS1	0.00038594
PRSS30P	0.000385713
KCNK13	0.000385318
C12orf42	0.000384993
TMEM132E	0.000384573
LIPF	0.000383931
OR7E47P	0.000383887
RTN4R	0.000383578
OIP5	0.000383572
TAS2R9	0.000383488
TDRD6	0.000383264
WDPCP	0.0003831
COX4I2	0.000382775
CST9	0.000382717
PRPH2	0.000382651
ANAPC7	0.000382649
HYDIN2	0.000382284
HMGB3P1	0.000382269
TRIM71	0.000382242
PCSK2	0.000381953
CYP4F30P	0.000381726
PRSS36	0.000381693
SERPINI1	0.000381669
SLC52A3	0.000381632
FDPSP2	0.000381559
DEFB1	0.000381289
AGBL1	0.000381171
ELSPBP1	0.000380671
CD80	0.000380643
OR2L2	0.000380558
SPC24	0.000380492
PTTG3P	0.000380426
ZMAT4	0.000380426
PSPC1	0.000380419
IL2	0.000380326
ARHGAP36	0.000380213
IQCF5	0.000380171
OR7C2	0.000379828
COL5A3	0.000379525
ZNF792	0.00037913
TAAR1	0.000379106
EBLN2	0.000378921
TBC1D24	0.000378799
TRAT1	0.000378746
SMKR1	0.000378518
STAC	0.000378389
DNAJB8	0.000378382
TMEM132D	0.00037838
SLC35E4	0.000378327
OR7D2	0.000378212
ZNF266	0.000378059
DKKL1	0.000377961
HDC	0.000377295
FANCD2OS	0.000377285
PGBD2	0.000377026
ADGRG2	0.000376999
OR52K3P	0.000376979
IBA57	0.000376779
BACE1	0.000376394
QRFPR	0.000376317
KRT32	0.000376238
KLHL21	0.000376212
TM2D1	0.000376132
MAGEC3	0.000376004
SLC46A3	0.000375938
C8orf82	0.000375902
NRIP2	0.000375688
ADCK1	0.000375566
TMEM207	0.000375487
HCG4	0.000375394
CPEB1	0.000375365
TTC12	0.000374951
FBXO15	0.000374941
C1orf87	0.000374837
ADAMTS18	0.00037457
KIAA0319	0.000374208
MYBPC3	0.000374175
LMX1A	0.000374049
ZNF322	0.000374043
ADGRF3	0.000374001
PHF14	0.000373664
OR8B8	0.000373562
PLK5	0.000373514
SLC13A1	0.000373177
TSKS	0.000373142
AGK	0.000372854
TEX35	0.000372759
C5orf58	0.000372498
NPAP1	0.000372374
MUC7	0.000372316
C9orf57	0.000372247
F3	0.000372225
CYP4F2	0.000372127
[truncated: 14,740 more rows]

## Sheet: Supplementary Table 8
Supplementary Table 8. Metrics for multimodal transformer-based case-control classifiers with and without pretraining on aging data.
Disease_name_RAW	FNR	FPR	ACC	PREC	REC	F1	AUROC	AUPRC	FNR_RAW	FPR_RAW	ACC_RAW	PREC_RAW	REC_RAW	F1_RAW	AUROC_RAW	AUPRC_RAW	BETTER	DELTA	CASE	CONTROL
pulmonary fibrosis	0.103	0.615	0.588	0.593	0.897	0.714	0.707	0.794	0	0.744	0.574	0.574	1	0.729	0.493	0.574	TRUE	0.214	145	195
chronic obstructive pulmonary disease	0.436	0.256	0.64	0.688	0.564	0.62	0.667	0.639	0	0.923	0.52	0.52	1	0.684	0.453	0.483	TRUE	0.214	180	195
Parkinson's disease	0.69	0.31	0.517	0.5	0.31	0.383	0.635	0.587	0.793	0.103	0.567	0.667	0.207	0.316	0.583	0.599	TRUE	0.052	155	145
heart failure	0	0.764	0.567	0.567	1	0.724	0.552	0.658	0	0.764	0.567	0.567	1	0.724	0.466	0.553	TRUE	0.086	210	275
Columns description:
FNR	False negative rate with pretrainig
FPR	False positive rate with pretrainig
ACC	Accuracy with pretrainig
PREC	Precision with pretrainig
REC	Recall with pretrainig
F1	F1 score with pretrainig
AUROC	AUROC with pretrainig
AUPRC	AUPRC with pretrainig
FNR_RAW	False negative rate without pretrainig
FPR_RAW	False positive rate without pretrainig
ACC_RAW	Accuracy without pretrainig
PREC_RAW	Precision without pretrainig
REC_RAW	Recall without pretrainig
F1_RAW	F1 score without pretrainig
AUROC_RAW	AUROC without pretrainig
AUPRC_RAW	AUPRC without pretrainig
BETTER	Whether pretrainig gave AUROC quality improvement
DELTA	AUROC-AUROC_RAW
CASE	Total number of case samples used
CONTROL	Total number of control samples used
